# Supplementary material for: An Unbiased Approach to Identify Cellular Reprogramming Inducible Enhancers
Source: Preprints.org preprint supplement (doi:10.20944/preprints202410.2527.v1), 2024-10-31
Supplement: Supplementary file 1 [file supplementary]

## Sheet: norm counts
Table S6: Day 2 Upp1800-GFP(+) and GFP(-) RNA-seq dataset (normalized counts and DEGs list) (Referred to Figure 4).
Day 2 Upp1-800-GFP(+) and Upp1-800-GFP(-) RNA-seq normalized counts (estimateSizeFactors, DESeq2)
	Upp1-800-GFP(+) no1	Upp1-800-GFP(+) no2	Upp1-800-GFP(-) no1	Upp1-800-GFP(-) no2
0610005C13Rik	0	0	0	0
0610009B22Rik	191.021	205.616	281.759	284.502
0610009E02Rik	1.72091	2.12706	1.76651	1.8355
0610009L18Rik	4.30227	7.79923	10.5991	7.34199
0610009O20Rik	765.804	788.432	731.337	770.909
0610010B08Rik	0	0	0	0
0610010F05Rik	332.135	343.166	350.653	411.152
0610010K14Rik	767.525	731.001	1333.72	980.156
0610012G03Rik	1022.22	1040.84	1277.19	732.364
0610030E20Rik	215.974	165.202	189.017	258.805
0610031O16Rik	0	0	0	0
0610037L13Rik	451.738	495.606	694.24	534.13
0610038B21Rik	2.58136	3.54511	8.83257	3.671
0610039H22Rik	0	0	0	0
0610039K10Rik	1.72091	1.41804	1.76651	0
0610040B10Rik	6.02318	7.79923	13.2489	16.5195
0610040F04Rik	0.860454	0	0	0
0610040J01Rik	6.88363	4.96315	2.64977	5.50649
0610043K17Rik	0	0.709021	1.76651	0
1010001N08Rik	0	2.12706	0.883257	1.8355
1110002J07Rik	0	0	0	1.8355
1110002L01Rik	236.625	259.502	202.266	242.286
1110004F10Rik	1353.49	1354.23	1731.18	1600.55
1110006O24Rik	18.0695	17.0165	19.4317	9.17749
1110008L16Rik	335.577	370.818	296.774	310.199
1110008P14Rik	234.043	273.682	401.882	299.186
1110012L19Rik	483.575	512.622	482.259	446.026
1110015O18Rik	0	0	0	0
1110017D15Rik	1.72091	0	0	0
1110019D14Rik	55.0691	34.742	44.1629	29.368
1110020A21Rik	6.02318	4.96315	9.71583	3.671
1110025L11Rik	0	0	0	0
1110028F11Rik	0	0	0	0
1110028F18Rik	0	0	0	0
1110032A03Rik	85.1849	102.099	90.9755	82.5974
1110032F04Rik	21.5113	36.8691	13.2489	7.34199
1110036E04Rik	0	0	0	0
1110038B12Rik	1734.68	1794.53	2561.45	1712.52
1110038F14Rik	678.038	641.664	947.735	776.416
1110046J04Rik	3.44182	2.83609	12.3656	9.17749
1110051M20Rik	695.247	719.657	568.818	539.636
1110058D11Rik	0.860454	0	0.883257	0
1110059E24Rik	404.413	423.286	525.538	519.446
1110059G10Rik	153.161	165.202	225.231	218.424
1110065P20Rik	597.155	614.722	998.081	675.463
1190002N15Rik	523.156	467.954	502.573	488.242
1190005I06Rik	11.1859	12.7624	14.1321	9.17749
1190007I07Rik	110.999	126.206	161.636	93.6104
1190028D05Rik	0	0	0	0
1300002E11Rik	70.5572	69.4841	93.6253	71.5844
1300017J02Rik	0.860454	0	1.76651	0
1500004A13Rik	0.860454	3.54511	4.41629	0
1500009C09Rik	0	0	0	0
1500009L16Rik	76.5804	92.1728	117.473	86.2684
1500011B03Rik	93.7895	116.279	125.423	88.1039
1500011K16Rik	440.552	475.044	756.952	521.281
1500012K07Rik	0	0	0	0
1500015A07Rik	258.136	248.157	264.094	231.273
1500015L24Rik	0	0	0	0
1500015O10Rik	44.7436	41.1232	149.27	106.459
1500026H17Rik	0.860454	2.12706	0	0
1600002D24Rik	0	0	0	0
1600002K03Rik	136.812	160.948	211.099	152.346
1600010M07Rik	0	0	0	0
1600012H06Rik	355.367	388.544	418.664	405.645
1600014C10Rik	1276.91	1281.2	1063.44	945.282
1600014C23Rik	0	0	0	3.671
1600015I10Rik	0	0	0	0
1600019K03Rik	0	0	0	0
1600020E01Rik	29.2554	34.033	37.9801	34.8745
1600023N17Rik	2.58136	0.709021	0	0
1600025M17Rik	0	0	0	0
1600027J07Rik	0	0.709021	0	0
1600029I14Rik	0	0	0	0
1600029O15Rik	0	0	0	0
1700001C02Rik	0	0	0	0
1700001C19Rik	0	0.709021	0	0
1700001D01Rik	0	0	0	0
1700001F09Rik	0	0	0	0
1700001G01Rik	0	0	0	0
1700001G11Rik	13.7673	18.4346	7.06606	9.17749
1700001G17Rik	5.16272	6.38119	7.94932	5.50649
1700001J03Rik	0	0	0	0
1700001J11Rik	0	0	0	0
1700001K19Rik	0.860454	0.709021	0	0
1700001K23Rik	0	0	0	0
1700001L05Rik	24.9532	29.7789	22.9647	9.17749
1700001L19Rik	1.72091	4.25413	4.41629	5.50649
1700001O22Rik	9.46499	14.1804	17.6651	14.684
1700001P01Rik	6.02318	5.67217	2.64977	5.50649
1700003C15Rik	0	0	0	0
1700003D09Rik	0	0	0	0
1700003E16Rik	61.0922	48.2135	37.0968	29.368
1700003E24Rik	0	0	0	0
1700003F12Rik	12.9068	7.79923	15.8986	20.1905
1700003G13Rik	0	0	0	0
1700003G18Rik	0	0	0	0
1700003H04Rik	0	0	0	0
1700003I22Rik	0	0	0	0
1700003L19Rik	0	0	0	0
1700003M07Rik	67.1154	73.0292	30.0308	23.8615
1700003P14Rik	0	0	0	0
1700006A11Rik	0	0	0	0
1700006F04Rik	0	0	0	0
1700006H21Rik	0	0	0	0
1700007F19Rik	0	0	0	0
1700007J10Rik	0	0.709021	0	0
1700007K13Rik	276.206	269.428	158.103	117.472
1700007L15Rik	21.5113	19.1436	45.9294	27.5325
1700007P06Rik	0	0.709021	0	0
1700008C04Rik	0	0	0	0
1700008J07Rik	39.5809	44.6683	45.0461	22.026
1700008K24Rik	0	0	0	0
1700008O03Rik	8.60454	7.79923	4.41629	3.671
1700008P02Rik	0	0	0	0
1700009C05Rik	0	0	0	0
1700009J07Rik	0	0	0	0
1700009N14Rik	0.860454	0	0	0
1700010B08Rik	0	0	0	1.8355
1700010D01Rik	0	0	0	0
1700010I02Rik	0	0	0	0
1700010I14Rik	18.93	9.9263	9.71583	16.5195
1700010J16Rik	0	0	0	0
1700010K23Rik	0	0.709021	0	3.671
1700010N08Rik	0	0	0	0
1700011B04Rik	0	0	0	0
1700011C11Rik	0	0	0	0
1700011L22Rik	0	0	0	0
1700011M02Rik	0	0	0	0
1700012A03Rik	0	0	0	0
1700012B07Rik	0	0	0.883257	0
1700012B09Rik	0	0	0	0
1700012C14Rik	0	0	0	0
1700012D01Rik	7.74409	10.6353	7.06606	18.355
1700012D14Rik	0	4.96315	0.883257	0
1700012D16Rik	0	0	0	0
1700012H19Rik	0	0	0	0
1700012I11Rik	0	0	0	0
1700012P22Rik	0	0	0	0
1700013D24Rik	0	0	0	0
1700013F07Rik	0	0.709021	0	0
1700013G24Rik	0.860454	0	0	0
1700013H16Rik	0	0	0	0
1700015F17Rik	0	0	2.64977	0
1700015G11Rik	0	0	0	0
1700016A09Rik	0.860454	4.25413	0.883257	0
1700016C15Rik	0	0	0	0
1700016D06Rik	0	0	0	0
1700016G22Rik	0	0	0	0
1700016H13Rik	0.860454	2.12706	0.883257	1.8355
1700016K05Rik	0	0	0.883257	0
1700016K19Rik	0	0.709021	0.883257	0
1700016L04Rik	0.860454	0	0	0
1700016L21Rik	0	0	0	0
1700016P04Rik	0	0	0	0
1700017B05Rik	945.639	957.179	958.334	961.801
1700017D01Rik	0	0	0	0
1700017G19Rik	0	0	0	0
1700017J07Rik	0	0	0	0
1700017L05Rik	0	0	0	0
1700017N19Rik	0	0	0	0
1700018A04Rik	0	0	0	1.8355
1700018B08Rik	0.860454	0	0	0
1700018B24Rik	0	0	0	0
1700018F24Rik	0	0	0	0
1700018G05Rik	0	0	0	0
1700018L02Rik	3.44182	4.96315	3.53303	3.671
1700019A02Rik	0	0	0	1.8355
1700019C18Rik	0	0	0	0
1700019D03Rik	82.6036	90.0457	40.6298	56.9004
1700019E08Rik	0	0	0	0
1700019G24Rik	0	0	0	0
1700019M22Rik	0	0	0	0
1700019N19Rik	0	0	0	0
1700019P21Rik	0	0	0	0
1700020A23Rik	0	0	0	0
1700020D05Rik	8.60454	7.09021	2.64977	0
1700020D14Rik	0	0	0	0
1700020G17Rik	0	0	0	0
1700020I14Rik	363.972	385.708	433.679	513.939
1700020L24Rik	0.860454	0	1.76651	0
1700020M21Rik	0	0	0	0
1700020N01Rik	0	0	0	0
1700020N15Rik	0	0	0	0
1700020N18Rik	0	0	0	0
1700021F02Rik	0	0	0	0
1700021F05Rik	362.251	406.269	481.375	447.862
1700021F07Rik	0	0	0	0
1700021N21Rik	0	0	0	0
1700022A21Rik	0	0	0	0
1700022A22Rik	0	0	0	0
1700022E09Rik	0	0	0	0
1700022H01Rik	0	0	0	0
1700022H16Rik	0	0	0	0
1700022I11Rik	0	0	0	0
1700023C21Rik	0	0	0	0
1700023D09Rik	0	1.41804	5.29954	1.8355
1700023F02Rik	0	0	0	0
1700023F06Rik	1.72091	2.12706	0.883257	0
1700024B18Rik	0	0	0	0
1700024F13Rik	0	3.54511	3.53303	1.8355
1700024G13Rik	0	0	0	0
1700024I08Rik	0	0	0	0
1700024N05Rik	0	0	0	0
1700024P04Rik	0	0	0	0
1700025B11Rik	0	0	0	0
1700025C18Rik	0	0	0	0
1700025F22Rik	0	0	0	0
1700025F24Rik	0	0	0	0
1700025G04Rik	341.6	328.986	355.953	390.961
1700025J12Rik	0	0	0	0
1700025K24Rik	0	0	0	0
1700025M24Rik	0.860454	0	0	3.671
1700025N23Rik	0	0	0	0
1700026D11Rik	0	0	0	0
1700026F02Rik	0	0	0	0
1700026J14Rik	0	0	0	0
1700027A15Rik	0	0	0	0
1700027F06Rik	0	0	0	0
1700027F09Rik	0	0	0	0
1700027H10Rik	0	0	0	0
1700027I24Rik	0	0	0	0
1700027J07Rik	0	0	0	0
1700028B04Rik	0	0	0	0
1700028D13Rik	0	0	0	0
1700028E10Rik	0	0.709021	0	0
1700028I16Rik	2.58136	0.709021	1.76651	0
1700028J19Rik	6.88363	3.54511	7.94932	9.17749
1700028K03Rik	0	0	0	0
1700028M03Rik	0	0.709021	0	0
1700028P14Rik	0.860454	0	0	1.8355
1700028P15Rik	0	0	0	0
1700029B22Rik	0	0	0	0
1700029F12Rik	0	0	0	0
1700029H14Rik	0.860454	0	0.883257	0
1700029I15Rik	1.72091	2.83609	1.76651	3.671
1700029J03Rik	0	0	0	0
1700029J07Rik	13.7673	12.0534	7.06606	3.671
1700029M20Rik	0	0.709021	0	0
1700029N11Rik	0	0	0	0
1700029P11Rik	0	0	0	0
1700030A11Rik	0	0	0	0
1700030C10Rik	43.8832	41.8323	52.9954	29.368
1700030C14Rik	0	0	0	0
1700030F04Rik	0	0	0	0
1700030F18Rik	0	0	0	0
1700030J22Rik	19.7904	9.9263	11.4823	7.34199
1700030K09Rik	198.765	198.526	234.063	170.701
1700030L20Rik	0	0	0	0
1700030M09Rik	0	0	0.883257	0
1700030N03Rik	0	0	0	0
1700030O20Rik	0	0	0	0
1700031A10Rik	0	0	0	0
1700031F05Rik	0	0	0	0
1700031L13Rik	0	0	0	0
1700031M16Rik	0	0	0	0
1700031P21Rik	0	0	0	0
1700034E13Rik	0	0	0	0
1700034G24Rik	0	0	0	0
1700034H15Rik	6.02318	0.709021	7.06606	1.8355
1700034I23Rik	0	0	0	0
1700034J05Rik	0	0	0	0
1700034K08Rik	0	0	0	0
1700034P13Rik	0.860454	0	2.64977	1.8355
1700036G14Rik	0.860454	0.709021	3.53303	0
1700037C18Rik	23.2323	19.1436	43.2796	25.697
1700037H04Rik	1400.82	1471.93	1723.24	1218.77
1700039E22Rik	0	0	0	0
1700039M10Rik	0	0	0	0
1700040D17Rik	0.860454	0	0	1.8355
1700041A01Rik	0	0	0	0
1700041C23Rik	0	0	0	0
1700041M19Rik	0	0	0	0
1700042G07Rik	0	0	0	0
1700042G15Rik	0	0	0	0
1700042O10Rik	17.2091	17.0165	19.4317	9.17749
1700044C05Rik	0	0	0	0
1700044K03Rik	0	0	0	0
1700045H11Rik	0	0	0	0
1700046C09Rik	0	0	0	0
1700047A11Rik	0	0	0	0
1700047E10Rik	0	0	0	0
1700047G03Rik	0	0	0	0
1700047I17Rik2	0	0	0	0
1700047L14Rik	0	0	0	0
1700047M11Rik	0	0	0	0
1700048M11Rik	0	0	0	0
1700048O20Rik	55.9295	49.6315	60.9448	69.7489
1700049E15Rik	0	0	0	0
1700049E17Rik1	0	0	0	0
1700049E17Rik2	0	0	0	0
1700049E22Rik	0	0	0	0
1700049L16Rik	0	0	0	0
1700051A21Rik	0	0	0	0
1700052I22Rik	0	0	0	0
1700052K11Rik	61.9527	69.4841	87.4425	64.2424
1700054A03Rik	0	0	0	0
1700054K19Rik	0	0	0	0
1700054M17Rik	0	0	0	0
1700055C04Rik	0	0	0	0
1700055D16Rik	0	0	0	0
1700056E22Rik	18.93	19.1436	26.4977	5.50649
1700057G04Rik	0.860454	0.709021	0	0
1700057H15Rik	0	0	0	0
1700057H21Rik	0	0	0	0
1700060C16Rik	0	0	0	0
1700060C20Rik	0	0	0	0
1700061F12Rik	0	0	0	0
1700061G19Rik	0	0.709021	0	1.8355
1700061I17Rik	4.30227	2.12706	0.883257	1.8355
1700061J23Rik	0	0	0	0
1700061N14Rik	0.860454	0.709021	0.883257	1.8355
1700063A18Rik	0	0	0	0
1700063D05Rik	1.72091	0	0	0
1700063H04Rik	0	0	0	0
1700063O14Rik	0	0	0	0
1700064J06Rik	0	0	0	0
1700064M15Rik	0	0	0	0
1700065D16Rik	2.58136	0	3.53303	0
1700065I16Rik	0	0	0	0
1700065J11Rik	0	0	0	0
1700065J18Rik	0	0	0	0
1700065L07Rik	0	0	0	0
1700065O20Rik	0	0	0	0
1700066B17Rik	0	0	0	0
1700066B19Rik	0.860454	0	1.76651	1.8355
1700066C05Rik	0	0	0	0
1700066J03Rik	0	0	0.883257	0
1700066M21Rik	154.882	128.333	185.484	205.576
1700066N21Rik	0	0	0	0
1700066O22Rik	0	0	0	0
1700067G17Rik	0	0	0	0
1700067K01Rik	2.58136	2.12706	1.76651	0
1700067P10Rik	0	0	0	0
1700069L16Rik	0	0	0	0
1700069P05Rik	0	0	0	0
1700071K01Rik	0	0	0	0
1700071M16Rik	0	0	0	0
1700072B07Rik	0	0	0	0
1700072I22Rik	0	0	0	0
1700072O05Rik	0	0	0	0
1700073E17Rik	0	0	0	0
1700074H08Rik	0	0	0	0
1700074P13Rik	0	0	0	0
1700080E11Rik	0	0	0	0
1700080N15Rik	0	0	0	0
1700080O16Rik	0	0	0	0
1700081H04Rik	0	0	0	0
1700083H02Rik	0	0	0	0
1700084D21Rik	0	0	0	0
1700084E18Rik	1.72091	8.50826	10.5991	1.8355
1700084F23Rik	0	0	0	0
1700084J12Rik	0	0	0	0
1700084M14Rik	0	0	0	0
1700085C21Rik	0	0	0	0
1700086L19Rik	0	0	0	0
1700086O06Rik	30.1159	30.4879	24.7312	22.026
1700088E04Rik	12.9068	7.79923	7.94932	12.8485
1700091H14Rik	0	0	0	0
1700092C02Rik	0	0	0	0
1700092C10Rik	0	0	0	0
1700092E19Rik	0	0	0	0
1700092K14Rik	0	0	0	0
1700092M07Rik	12.9068	9.21728	1.76651	5.50649
1700093K21Rik	0.860454	0	2.64977	0
1700094D03Rik	36.9995	45.3774	35.3303	44.052
1700094J05Rik	0	0	0	0
1700094M24Rik	0	0	0	0
1700095A21Rik	0	0	0	0
1700095B10Rik	0	0	0	0
1700095J03Rik	0.860454	2.83609	0	0
1700095J12Rik	0	0	0	0
1700096J18Rik	0	0	0	0
1700096K18Rik	18.0695	17.0165	25.6145	25.697
1700096P03Rik	0	0	0	0
1700097N02Rik	0	0	0.883257	0
1700099I09Rik	0	0	1.76651	0
1700100I10Rik	0	0	0	0
1700100L14Rik	0	0	0	0
1700101I11Rik	0	0	2.64977	0
1700101O22Rik	0	0	0	0
1700102H20Rik	2.58136	3.54511	8.83257	3.671
1700102P08Rik	4.30227	4.96315	1.76651	3.671
1700104L18Rik	0	0	0	0
1700105P06Rik	2.58136	2.12706	0	0
1700108F19Rik	0	0	0	0
1700108J01Rik	0	0	0	0
1700109G14Rik	0	0	0	1.8355
1700109G15Rik	0	0	0	0
1700109H08Rik	6.88363	7.79923	3.53303	11.013
1700109I08Rik	0	0	0	0
1700109K24Rik	0	0	0	0
1700110C19Rik	0	0	0.883257	0
1700110I01Rik	0	0	0	0
1700110I07Rik	0	0	0	0
1700110K17Rik	0	0	0	0
1700111N16Rik	0	0	0	0
1700112H15Rik	0	0	0	0
1700112J05Rik	0	0	0	0
1700112J16Rik	0	1.41804	1.76651	1.8355
1700113A16Rik	13.7673	11.3443	15.0154	14.684
1700113B09Rik	0	0	0	0
1700113H08Rik	0	2.12706	0	0
1700116B05Rik	0	0	0	0
1700119H24Rik	2.58136	1.41804	0	0
1700120C14Rik	0.860454	0	0	0
1700120E14Rik	0	0	0	0
1700120G07Rik	0	0	0	0
1700120K04Rik	0	1.41804	2.64977	1.8355
1700121L16Rik	0	0	0	0
1700121N20Rik	0	0	0	0
1700122C19Rik	0	0	0	0
1700122H20Rik	0	0	0	0
1700122O11Rik	0	0	0	0
1700123J17Rik	0	0	0	0
1700123K08Rik	0	0	0	0
1700123L14Rik	0	0	0	0
1700123M08Rik	4.30227	7.79923	18.5484	5.50649
1700123O12Rik	0	0	0	0
1700123O20Rik	561.876	598.414	791.399	658.944
1700123O21Rik	0	0	0	0
1700124L16Rik	6.88363	0.709021	5.29954	1.8355
1700125G02Rik	0	0	0	0
1700125G22Rik	0	2.12706	0	0
1700125H03Rik	0	0	0	0
1700125H20Rik	0	0.709021	0	0
1700126H18Rik	0	0	0	0
1700128A07Rik	0	0	0	0
1700128F08Rik	0.860454	0	0	0
1700129C05Rik	0	0	0	0
1810006J02Rik	0	0	0	0
1810007C17Rik	0	0	0	0
1810007D17Rik	0	0	0	0
1810008I18Rik	0	0	0	0
1810009A15Rik	40.4413	51.7586	54.762	56.9004
1810009J06Rik	0	0	0	0
1810010D01Rik	2.58136	2.12706	0.883257	1.8355
1810010H24Rik	22.3718	25.5248	18.5484	20.1905
1810012K16Rik	0.860454	0.709021	0	0
1810013A23Rik	0	0	0	0
1810013L24Rik	499.924	493.479	455.761	457.039
1810014B01Rik	45.6041	48.9225	52.1122	36.71
1810018F18Rik	0	0	0	0
1810019D21Rik	11.1859	7.79923	7.06606	3.671
1810020O05Rik	0	0	0	0
1810021B22Rik	6.88363	19.1436	24.7312	7.34199
1810022K09Rik	442.273	504.823	755.185	774.58
1810024B03Rik	1.72091	6.38119	5.29954	3.671
1810026B05Rik	215.974	199.944	287.942	150.511
1810030O07Rik	491.319	494.897	550.269	524.952
1810032O08Rik	474.11	463.7	569.701	486.407
1810034E14Rik	18.0695	15.5985	6.1828	14.684
1810037I17Rik	610.922	581.397	922.121	647.931
1810041H14Rik	4.30227	5.67217	6.1828	3.671
1810043G02Rik	186.719	197.108	224.347	196.398
1810044D09Rik	15.4882	16.3075	23.8479	14.684
1810046K07Rik	0	0	0	0
1810053B23Rik	0	0	0	0
1810055G02Rik	785.594	825.301	729.571	888.381
1810058I24Rik	1325.96	1360.61	1631.38	1200.42
1810062G17Rik	18.93	29.7789	24.7312	16.5195
1810062O18Rik	3.44182	3.54511	1.76651	3.671
1810063I02Rik	0	0	0	0
1810064F22Rik	0	0	0	0
1810065E05Rik	0	0	0.883257	1.8355
2010001A14Rik	42.1622	36.8691	63.5945	38.5455
2010003K11Rik	0	0	0	0
2010005H15Rik	0	0	0	0
2010009K17Rik	0	0	0	0
2010010A06Rik	0.860454	0	0	0
2010016I18Rik	0	0	0	0
2010106C02Rik	0	0	0	0
2010106E10Rik	0	0	0	0
2010109A12Rik	0.860454	0.709021	0	1.8355
2010109I03Rik	0	0	0	0
2010111I01Rik	1571.19	1643.51	2404.23	2074.11
2010204K13Rik	350.205	299.916	491.091	398.303
2010300C02Rik	12.9068	21.9797	7.94932	9.17749
2010308F09Rik	0.860454	0	0.883257	1.8355
2010310C07Rik	0	2.83609	0	0
2010315B03Rik	42.1622	60.9758	45.9294	53.2294
2010320M18Rik	118.743	130.46	154.57	115.636
2200002D01Rik	119.603	110.607	187.251	91.7749
2200002J24Rik	0	0	0	0
2210010C04Rik	0	0	0	0
2210011C24Rik	2.58136	2.83609	8.83257	12.8485
2210016F16Rik	1116.87	1096.15	1477.69	908.572
2210016L21Rik	746.014	715.403	761.368	616.727
2210039B01Rik	0.860454	0	0	1.8355
2210404E10Rik	0.860454	0	0	0
2210406O10Rik	4.30227	2.83609	1.76651	1.8355
2210407C18Rik	0	0	0	0
2210408F21Rik	27.5345	29.0699	29.1475	22.026
2210408I21Rik	55.9295	61.6849	52.1122	67.9134
2210409D07Rik	0	0	0	0
2210409E12Rik	0	0	0	0
2210414B05Rik	0	0	0	0
2210416O15Rik	0.860454	1.41804	13.2489	3.671
2210417A02Rik	0	0	0	0
2210418O10Rik	0	0	0	0
2210420H20Rik	0	0	0	0
2300002M23Rik	14.6277	9.21728	27.381	18.355
2300003K06Rik	0	0	0	0
2300009A05Rik	67.1154	99.972	138.671	78.9264
2310001H17Rik	9.46499	11.3443	7.06606	7.34199
2310001K24Rik	0.860454	0	0	0
2310002D06Rik	0	0	0	0
2310002F09Rik	5.16272	6.38119	11.4823	3.671
2310002L09Rik	0	0	0	0
2310003N18Rik	0	0	0	0
2310005A03Rik	0	0	0	0
2310005E17Rik	0	0	0	0
2310007B03Rik	0.860454	0.709021	1.76651	3.671
2310008N11Rik	0	0.709021	0	0
2310009A05Rik	86.0454	80.8284	94.5085	77.0909
2310009B15Rik	160.905	148.894	227.88	150.511
2310010J17Rik	14.6277	17.0165	18.5484	12.8485
2310011J03Rik	801.943	764.325	977.766	690.147
2310015A10Rik	42.1622	47.5044	44.1629	44.052
2310015D24Rik	0	0	0	0
2310016D03Rik	0	0	0	0
2310016G11Rik	0	0	0	0
2310020H05Rik	0	0	0	0
2310022A10Rik	643.62	592.033	564.401	519.446
2310022B05Rik	4501.03	4537.74	6108.61	5603.78
2310030A07Rik	0	0	0	0
2310030G06Rik	48.1854	51.7586	57.4117	45.8875
2310033P09Rik	493.04	505.532	729.571	484.571
2310034C09Rik	0	0	1.76651	0
2310034G01Rik	17.2091	14.8894	21.1982	16.5195
2310034O05Rik	0	0	0	0
2310035C23Rik	522.296	522.549	399.232	468.052
2310039H08Rik	311.484	299.207	415.131	249.628
2310039L15Rik	0	0	0	0
2310040G24Rik	0	0.709021	1.76651	0
2310043L19Rik	0	0	0	0
2310043M15Rik	18.93	20.5616	12.3656	5.50649
2310043O21Rik	0	0	0	0
2310050C09Rik	0	0.709021	0	0
2310057J18Rik	0	0	0	0
2310057M21Rik	258.136	250.994	249.079	271.654
2310057N15Rik	1.72091	1.41804	0	0
2310061I04Rik	743.432	735.255	968.933	691.983
2310061N02Rik	0	0	0	0
2310065F04Rik	0	0	0	0
2310068J16Rik	6.02318	3.54511	13.2489	3.671
2310069B03Rik	0.860454	0	0	0
2310069G16Rik	2.58136	0.709021	5.29954	5.50649
2310075C17Rik	0	0	0	0
2310079G19Rik	0	0	0	0
2310081J21Rik	0	0	0	0
2400006E01Rik	0	0	0	0
2410002F23Rik	1143.54	1167.05	1232.14	1086.61
2410003L11Rik	0	0	0.883257	0
2410004B18Rik	357.949	341.748	476.076	363.429
2410004I01Rik	0.860454	0	0.883257	0
2410004P03Rik	4.30227	4.96315	5.29954	7.34199
2410006H16Rik	2647.62	2961.58	4140.71	3166.23
2410012E07Rik	0	0	0	0
2410015M20Rik	1202.91	1323.03	1725	1398.65
2410017I17Rik	0	0	0	0
2410018L13Rik	17.2091	23.3977	22.9647	33.039
2410021H03Rik	0	0	0	0
2410022M11Rik	37.86	36.1601	69.7773	51.3939
2410124H12Rik	1.72091	1.41804	0	1.8355
2410131K14Rik	369.135	348.129	307.374	315.706
2410137M14Rik	1.72091	0.709021	0	0
2410141K09Rik	0	0	0	0
2500002B13Rik	40.4413	48.2135	51.2289	44.052
2500004C02Rik	24.9532	37.5781	28.2642	38.5455
2510002D24Rik	243.508	249.576	295.008	264.312
2510003B16Rik	4.30227	5.67217	11.4823	3.671
2510009E07Rik	431.087	409.814	414.248	567.169
2510039O18Rik	2360.23	2280.92	2269.97	1642.77
2610001J05Rik	596.295	565.799	708.372	629.576
2610002M06Rik	297.717	308.424	276.46	306.528
2610005L07Rik	50.7668	48.2135	20.3149	58.7359
2610008E11Rik	117.022	126.915	139.555	183.55
2610016A17Rik	0.860454	2.12706	0	1.8355
2610020C07Rik	10.3254	6.38119	5.29954	11.013
2610024D14Rik	0.860454	0	0	0
2610027K06Rik	3.44182	4.25413	1.76651	1.8355
2610028E06Rik	0.860454	0	0	0
2610028H24Rik	0.860454	0	0	1.8355
2610035D17Rik	34.4182	40.4142	51.2289	38.5455
2610035F20Rik	0	0	0.883257	0
2610037D02Rik	0.860454	1.41804	0.883257	0
2610042L04Rik	0	0	0.883257	0
2610044O15Rik8	62.8131	59.5578	86.5592	95.4459
2610203C22Rik	3.44182	3.54511	2.64977	5.50649
2610206C17Rik	0	0.709021	0	1.8355
2610301B20Rik	208.23	227.596	229.647	275.325
2610306M01Rik	58.5109	46.7954	81.2597	55.0649
2610307P16Rik	1.72091	5.67217	2.64977	0
2610316D01Rik	2.58136	2.83609	7.06606	5.50649
2610318M16Rik	0	0	0	0
2610318N02Rik	80.0222	80.1194	105.108	104.623
2610507B11Rik	4590.52	4498.03	3018.97	4260.19
2610507I01Rik	3.44182	2.83609	1.76651	3.671
2610524H06Rik	174.672	156.694	299.424	223.931
2610528A11Rik	1.72091	1.41804	3.53303	1.8355
2610528J11Rik	0	0.709021	0	0
2700012I20Rik	0	1.41804	2.64977	0
2700038G22Rik	49.0459	53.1766	77.7267	82.5974
2700046A07Rik	0	0	0	0
2700046G09Rik	30.1159	31.906	30.0308	29.368
2700049A03Rik	307.182	282.9	279.993	262.476
2700054A10Rik	8.60454	9.21728	10.5991	1.8355
2700062C07Rik	164.347	152.44	244.662	227.602
2700069I18Rik	0.860454	0.709021	10.5991	3.671
2700070H01Rik	1.72091	0	1.76651	0
2700081O15Rik	1233.03	1191.16	950.385	1093.96
2700089I24Rik	0	0	0	0
2700097O09Rik	135.091	143.222	142.204	167.03
2700099C18Rik	129.929	150.313	184.601	163.359
2810001G20Rik	49.9063	41.1232	81.2597	73.4199
2810002D19Rik	59.3713	51.7586	85.676	75.2554
2810004N23Rik	889.709	894.076	1192.4	987.498
2810006K23Rik	186.719	174.419	248.195	218.424
2810013P06Rik	65.3945	46.7954	68.8941	82.5974
2810021J22Rik	197.044	207.034	132.489	176.208
2810025M15Rik	850.128	883.441	1153.53	1073.77
2810029C07Rik	21.5113	39.7052	27.381	12.8485
2810032G03Rik	5.16272	10.6353	13.2489	12.8485
2810047C21Rik1	1.72091	4.96315	1.76651	1.8355
2810049E08Rik	0	0	0	0
2810403A07Rik	852.71	911.801	771.967	994.84
2810403D21Rik	9.46499	12.0534	15.8986	29.368
2810404M03Rik	0	0	0	0
2810405F15Rik	0	0	0	0
2810408A11Rik	49.9063	48.9225	53.8787	75.2554
2810408I11Rik	49.0459	68.7751	110.407	91.7749
2810410L24Rik	30.9763	25.5248	30.0308	31.2035
2810414N06Rik	9.46499	7.09021	11.4823	12.8485
2810429I04Rik	12.9068	14.1804	12.3656	16.5195
2810433D01Rik	3.44182	10.6353	14.1321	7.34199
2810442N19Rik	6.02318	1.41804	7.06606	5.50649
2810454H06Rik	2.58136	5.67217	6.1828	9.17749
2810459M11Rik	0.860454	9.9263	2.64977	1.8355
2810468N07Rik	11.1859	7.79923	15.0154	9.17749
2810471M01Rik	0	0	0	0
2900005J15Rik	46.4645	38.2872	17.6651	27.5325
2900009J06Rik	10.3254	5.67217	9.71583	3.671
2900011O08Rik	20.6509	21.2706	10.5991	16.5195
2900026A02Rik	735.688	706.185	651.844	638.753
2900040C04Rik	0	0	0	0
2900041M22Rik	27.5345	22.6887	39.7466	31.2035
2900052L18Rik	62.8131	73.0292	59.1782	58.7359
2900052N01Rik	0	0	0	0
2900055J20Rik	0	0	0	0
2900057B20Rik	0.860454	0	0	0
2900060B14Rik	0	0	1.76651	0
2900076A07Rik	41.3018	60.2668	72.4271	69.7489
2900079G21Rik	0	1.41804	0	0
2900092C05Rik	0	0	0	0
2900092D14Rik	0	0	0.883257	0
2900093K20Rik	2.58136	8.50826	4.41629	3.671
2900097C17Rik	961.987	935.908	1035.18	1086.61
3000002C10Rik	15.4882	21.9797	11.4823	16.5195
3010001F23Rik	6.88363	7.79923	3.53303	5.50649
3010003L21Rik	22.3718	30.4879	32.6805	27.5325
3100003L05Rik	0	0	0	0
3110009E18Rik	17.2091	14.8894	35.3303	29.368
3110009F21Rik	0	0	0	0
3110015C05Rik	0	0	0	0
3110021A11Rik	1.72091	0.709021	5.29954	1.8355
3110039I08Rik	94.6499	140.386	189.017	242.286
3110039M20Rik	0.860454	0	0.883257	0
3110040N11Rik	278.787	277.227	355.069	244.121
3110043O21Rik	181.556	175.128	157.22	200.069
3110045C21Rik	9.46499	14.8894	17.6651	11.013
3110056K07Rik	14.6277	18.4346	28.2642	34.8745
3110062M04Rik	277.927	258.084	300.308	231.273
3110070M22Rik	6.02318	11.3443	13.2489	14.684
3110082I17Rik	758.06	759.362	1030.76	789.264
3110082J24Rik	1.72091	2.83609	4.41629	9.17749
3110099E03Rik	0	2.12706	0	0
3200001D21Rik	0	0	0	0
3300002I08Rik	8.60454	17.0165	6.1828	5.50649
3300002P13Rik	0	0	0	0
3300005D01Rik	0	1.41804	0	0
3425401B19Rik	0	0	0	0
3632454L22Rik	8.60454	5.67217	4.41629	0
3830403N18Rik	9.46499	7.79923	12.3656	14.684
3830406C13Rik	216.834	226.178	270.277	245.957
3830408C21Rik	16.3486	19.8526	15.0154	16.5195
3830417A13Rik	0	0	0	0
3830432H09Rik	0.860454	0	0	0
3930402G23Rik	10.3254	6.38119	10.5991	7.34199
4430402I18Rik	13.7673	13.4714	12.3656	14.684
4631405J19Rik	0	0	0	0
4632404H12Rik	15.4882	24.8157	15.8986	25.697
4632415L05Rik	216.834	197.108	171.352	187.221
4632427E13Rik	2.58136	15.5985	15.8986	16.5195
4632428C04Rik	1.72091	3.54511	0.883257	3.671
4732414G09Rik	0	0	0.883257	0
4732416N19Rik	2.58136	2.83609	0.883257	1.8355
4732471J01Rik	1.72091	2.12706	6.1828	1.8355
4732490B19Rik	0.860454	0.709021	0.883257	0
4732491K20Rik	12.0464	19.1436	20.3149	29.368
4831407H17Rik	0	0	0	0
4831440E17Rik	3.44182	4.96315	1.76651	3.671
4833411C07Rik	0	0	0	0
4833412C05Rik	0.860454	1.41804	0.883257	5.50649
4833415N18Rik	4.30227	6.38119	2.64977	3.671
4833417C18Rik	9.46499	9.21728	9.71583	9.17749
4833418N02Rik	6.88363	9.9263	2.64977	5.50649
4833419F23Rik	5.16272	2.12706	4.41629	11.013
4833420G17Rik	382.902	394.925	373.618	389.126
4833422C13Rik	0	0.709021	0	0
4833422M21Rik	0	0	0	0
4833423E24Rik	0	0	0	0
4833427F10Rik	0	0	0	0
4833427G06Rik	75.7199	90.0457	52.1122	58.7359
4833428L15Rik	0	0	0.883257	0
4833438C02Rik	73.999	82.2465	79.4932	77.0909
4833439L19Rik	1099.66	1149.32	1290.44	1264.66
4921501E09Rik	0	0	0	0
4921504A21Rik	8.60454	9.9263	6.1828	5.50649
4921504E06Rik	0	0	0	0
4921507G05Rik	0	0	1.76651	0
4921507P07Rik	14.6277	12.7624	4.41629	9.17749
4921508D12Rik	0	0	0	0
4921509C19Rik	0	0	0	0
4921509O07Rik	0	0	0	0
4921511C10Rik	0	0	0	0
4921511C20Rik	0	0	0	0
4921511I17Rik	0	0	0	0
4921511M17Rik	0	0	0	0
4921513H07Rik	0	0	0	0
4921513I03Rik	0	0	0	0
4921515E04Rik	0	0	0	0
4921517D22Rik	0	0	0	0
4921518K17Rik	0	0	0	0
4921524J17Rik	265.88	258.793	338.288	317.541
4921524L21Rik	0	0	0	0
4921525O09Rik	0.860454	0	0	0
4921529L05Rik	0	0	0	0
4921530L21Rik	0	0	0	0
4921531C22Rik	15.4882	16.3075	22.9647	20.1905
4921531P14Rik	0	0	0	0
4921533I20Rik	0	0	0	0
4921534H16Rik	0	0	0	0
4921536K21Rik	11.1859	9.9263	10.5991	14.684
4921539E11Rik	0	0	0	0
4922502B01Rik	0	0	0	0
4922502D21Rik	0	0	0	0
4922502H24Rik	0	0	0	0
4922502N22Rik	0	0	0	0
4930401C15Rik	0	0	0	0
4930401O10Rik	0	0	0	0
4930401O12Rik	0	0	0	0
4930402F06Rik	0	0	2.64977	0
4930402F11Rik	0	0	0	0
4930402H24Rik	455.18	506.241	339.171	412.987
4930402K13Rik	0	0	0	0
4930404A05Rik	0	0	0	0
4930404H11Rik	0.860454	0	0	0
4930404I05Rik	0	0	0	0
4930404N11Rik	5.16272	1.41804	4.41629	1.8355
4930405A10Rik	0	0	0	0
4930405A21Rik	1.72091	2.12706	8.83257	7.34199
4930405D11Rik	0	0	0	0
4930405J17Rik	0	0	0	0
4930405L22Rik	0	0	0	0
4930405O22Rik	0.860454	0.709021	0	0
4930406D18Rik	0	0	0	0
4930407G08Rik	0	0	0	0
4930407I10Rik	0	0	0	0
4930407I19Rik	0	0	0	0
4930412B13Rik	0	0	0	1.8355
4930412C18Rik	21.5113	19.8526	7.94932	16.5195
4930412O13Rik	0	0	0.883257	1.8355
4930413E15Rik	0	0	0	0
4930413F20Rik	0.860454	0	0	0
4930413G21Rik	5.16272	2.83609	0	3.671
4930413M19Rik	0	0	0	0
4930414N06Rik	0	0	0	0
4930415L06Rik	0	0	0	0
4930415O20Rik	0	0	0	0
4930417O13Rik	0	0	0	0
4930417O22Rik	0	0	0	0
4930419G24Rik	0	0	0	0
4930422M22Rik	0	0	0	0
4930423M02Rik	0	0	0	0
4930425K10Rik	0	0	0	0
4930425L21Rik	0	0	0	0
4930425O10Rik	0	0	0	0
4930426D05Rik	0.860454	0	0	0
4930426L09Rik	4.30227	1.41804	0	1.8355
4930428D20Rik	0	0	0	0
4930428E07Rik	0	0	0	0
4930428G15Rik	0	0	0	0
4930428O21Rik	0	0	0	0
4930429B21Rik	130.789	144.64	107.757	88.1039
4930429D17Rik	0	0	0	0
4930429F11Rik	0	0	0	0
4930429F24Rik	1.72091	0.709021	0	0
4930429H19Rik	0	0	0	0
4930430A15Rik	0	0	0	0
4930430F08Rik	183.277	187.891	225.231	220.26
4930430F21Rik	0.860454	0	0.883257	0
4930430J02Rik	0	0	0	0
4930431F12Rik	0	0	0	0
4930431P03Rik	0	0.709021	0	0
4930431P22Rik	0	0	0	0
4930432J09Rik	0	0	0	0
4930432K21Rik	11.1859	9.9263	13.2489	7.34199
4930432L08Rik	1.72091	0	0	0
4930432M17Rik	0	0	0	0
4930432O09Rik	0	0	0	0
4930433B08Rik	0	0	0	0
4930433I11Rik	0	0	0	0
4930433N12Rik	0	0	0	0
4930434J06Rik	0	0	0	0
4930435E12Rik	0	0	0	0
4930435F18Rik	0	0	0	0
4930438E09Rik	0	0	0	0
4930440C22Rik	0	0	0	0
4930440I19Rik	0	0	0	0
4930441H08Rik	0	0	0	0
4930441J16Rik	0	0	0	0
4930442J19Rik	0	0	0	0
4930442L01Rik	0	0	0	0
4930443O20Rik	0	0	0	0
4930444F02Rik	0	0	0	0
4930444G20Rik	0	0	0	0
4930444M15Rik	0	0	1.76651	0
4930444P10Rik	2.58136	4.25413	5.29954	5.50649
4930445N18Rik	0.860454	0	0	0
4930447A16Rik	0	0	0	0
4930447C04Rik	6.88363	6.38119	5.29954	5.50649
4930447F24Rik	0.860454	4.25413	6.1828	3.671
4930447J18Rik	0	0	0	0
4930447K03Rik	4.30227	4.96315	1.76651	1.8355
4930447M23Rik	0.860454	0	0	0
4930447N08Rik	0	0	0	0
4930448C13Rik	0	0	0	0
4930448F12Rik	0	0	0	0
4930448H16Rik	0	0	0	0
4930448I06Rik	0	0	0	0
4930448I18Rik	0	0	0	0
4930448K20Rik	0	0	0	0
4930449E01Rik	0	0	0	0
4930449E18Rik	0	0	0	0
4930449I24Rik	0	0	0	0
4930451G09Rik	6.02318	5.67217	5.29954	5.50649
4930451I11Rik	0	0	0	0
4930452A19Rik	0	0	0	0
4930452B06Rik	98.9522	79.4104	84.7927	88.1039
4930452G13Rik	0	0	0	0
4930452N14Rik	0	0.709021	0.883257	0
4930453H23Rik	0	0	0	0
4930453L07Rik	0	0	0	0
4930453N24Rik	392.367	391.38	643.011	524.952
4930455B14Rik	0	0	0	0
4930455C13Rik	0	0	0	0
4930455D15Rik	0	0	0.883257	0
4930455F16Rik	0	0	0	0
4930455G09Rik	0	0	0	0
4930455H04Rik	0	0	0	0
4930455J16Rik	0	0	0	0
4930456L15Rik	0	0	0	0
4930459C07Rik	0	0	0	0
4930459L07Rik	0	0	0	0
4930461G14Rik	0	1.41804	2.64977	0
4930463O16Rik	0	0	0	0
4930465K10Rik	0	0.709021	0	1.8355
4930465M20Rik	0	0	0	0
4930467D21Rik	0	0	0	0
4930467E23Rik	0	0	0	0
4930467J12Rik	0	0	0	0
4930467K11Rik	0	0.709021	0	0
4930469K13Rik	1.72091	0	0	0
4930470G03Rik	0.860454	1.41804	0.883257	0
4930470H14Rik	0	0	0	0
4930470O06Rik	0	0	0	0
4930470P17Rik	0	0	0	0
4930471C04Rik	0	0	0	0
4930471G03Rik	0	0	0	0
4930471G24Rik	0	0	0	0
4930471M09Rik	0	0	0	0
4930473A02Rik	0.860454	1.41804	0	0
4930473O22Rik	0	0	0	0
4930474G06Rik	0	0	0	0
4930474H20Rik	0	0	0	0
4930474M22Rik	0	0	0	0
4930474N05Rik	0	0	0	0
4930474N09Rik	0	0	0	0
4930477N07Rik	0	0	0	0
4930478L05Rik	0	0	0	0
4930478P22Rik	0	0	0	0
4930479D17Rik	0	0	1.76651	3.671
4930480E11Rik	0	0	0	0
4930480G23Rik	0	0	0	0
4930480K15Rik	0	0	0	0
4930480K23Rik	6.88363	3.54511	2.64977	9.17749
4930480M12Rik	0	0	0	0
4930481A15Rik	5.16272	6.38119	6.1828	3.671
4930482G09Rik	0	0	0	0
4930483J18Rik	0	0	0.883257	0
4930483K19Rik	0	0	0	0
4930483O08Rik	0	0	0	0
4930484H19Rik	0	0	0	0
4930486F22Rik	0	0	0	0
4930486I03Rik	0	0	0	0
4930486L24Rik	0	0.709021	0.883257	1.8355
4930487D11Rik	0	0	0	0
4930487H11Rik	0	0	0	0
4930488B22Rik	0	0	0	0
4930488L21Rik	0	0	0	0
4930500F04Rik	0	0	0	0
4930500G05Rik	0.860454	0	0	0
4930500L23Rik	0.860454	0	0	0
4930502A04Rik	0	0	0	0
4930502E09Rik	0.860454	0.709021	0	1.8355
4930502E18Rik	1.72091	0	0	3.671
4930503B20Rik	0	0.709021	0.883257	0
4930503E14Rik	0	0	0	0
4930503E24Rik	0	0	0.883257	0
4930503F20Rik	0	0	0	0
4930503H13Rik	0	0	0	0
4930503L19Rik	170.37	168.747	192.55	245.957
4930503O07Rik	0	0	0	0
4930504C09Rik	0	0	0	0
4930504O13Rik	0	0	0	0
4930505A04Rik	0	0.709021	0.883257	1.8355
4930505G20Rik	0	0	0	0
4930505K13Rik	0	0	0	0
4930505K14Rik	0	0	0	0
4930505N22Rik	0	0	0	0
4930506A18Rik	0	0	0	0
4930506C21Rik	0	0.709021	0.883257	1.8355
4930507D05Rik	0	3.54511	6.1828	1.8355
4930507D10Rik	0	0	0	0
4930509E16Rik	7.74409	5.67217	9.71583	20.1905
4930509G22Rik	1.72091	0.709021	1.76651	1.8355
4930509J09Rik	0	0	0	0
4930509K18Rik	0	0	0	0
4930511A02Rik	1.72091	0	0	0
4930511A08Rik	0	0.709021	0.883257	0
4930511E03Rik	0	0	0	0
4930511M06Rik	3.44182	3.54511	0	0
4930512B01Rik	0	0	0.883257	0
4930512J16Rik	0	0	0	0
4930512M02Rik	0	0	0	0
4930513D17Rik	0	0	0	0
4930513N10Rik	28.395	23.3977	21.1982	25.697
4930513O06Rik	0	0	0	0
4930515B02Rik	0	0	0	0
4930515G01Rik	12.9068	17.7255	15.8986	14.684
4930515G16Rik	0	0	0	0
4930515L03Rik	0	0	0	0
4930515L19Rik	0	0	0	0
4930517E11Rik	0	0	0	0
4930517M08Rik	0	0	0	0
4930518J21Rik	0	0	0	0
4930518P08Rik	0	0	0	0
4930519D14Rik	0	0	0	0
4930519F16Rik	1.72091	1.41804	0	1.8355
4930519F24Rik	0	0	0	0
4930519G04Rik	0	0	0	0
4930519H02Rik	0	0	0	0
4930519K11Rik	0	0	0	0
4930519L02Rik	0	0	0	0
4930520O04Rik	4.30227	3.54511	3.53303	12.8485
4930520P13Rik	0	0	0	0
4930521E06Rik	0	0	0	0
4930521O11Rik	0	0	0	0
4930521O17Rik	0	0	0	0
4930522H14Rik	0	0	0	0
4930522O17Rik	0	0	0	0
4930522P08Rik	0.860454	2.12706	2.64977	1.8355
4930523C07Rik	103.254	114.861	98.0416	89.9394
4930523O13Rik	0	0	0	0
4930524B15Rik	0	0	0	0
4930524B17Rik	0	0	0	0
4930524C18Rik	0	0	0	0
4930524N10Rik	0	0	0	0
4930524O05Rik	0	0	0	0
4930524O08Rik	0	0	0	0
4930525C09Rik	0	0	0	0
4930525D18Rik	0.860454	0	0	1.8355
4930525G20Rik	2.58136	1.41804	0.883257	0
4930526H09Rik	0	0	0.883257	1.8355
4930526I15Rik	104.975	82.9555	92.742	45.8875
4930526L06Rik	0	0	0	0
4930527F14Rik	0	0	0	0
4930527G23Rik	0	0	0	0
4930528A17Rik	5.16272	7.09021	5.29954	0
4930528D03Rik	0	0	0	0
4930528G23Rik	0	0	0	1.8355
4930528H21Rik	0.860454	0	0	0
4930528P14Rik	0	0	0	0
4930529C04Rik	0.860454	0	0	0
4930529K09Rik	0	0	0	0
4930529L06Rik	0	0	0	0
4930529N20Rik	0	0	0	0
4930532I03Rik	0	0	0	0
4930532M18Rik	0	0	0	0
4930533B01Rik	0	0	0	0
4930533N22Rik	0	0	0	0
4930533P14Rik	0	0	0	0
4930534H03Rik	0	0	0	0
4930539C22Rik	0	0	0	0
4930539E08Rik	0	0	0	0
4930539J05Rik	1.72091	0	0.883257	1.8355
4930539M17Rik	0	0	0	0
4930539N22Rik	0	0	0	0
4930540M03Rik	0	0	0	0
4930542C21Rik	0	0	0	0
4930542D17Rik	0	0	0	0
4930542M03Rik	0	0	0	0
4930543E12Rik	0.860454	0	0	0
4930543N07Rik	0	0	0	0
4930544D05Rik	0	1.41804	0	1.8355
4930544G11Rik	0	0	0	0
4930544M13Rik	0	0.709021	0	0
4930545E07Rik	0	0	0	0
4930545H06Rik	0	0	0	0
4930545L23Rik	0	0	0	0
4930546C10Rik	0	0	0	0
4930546K05Rik	0	0	0	1.8355
4930547E08Rik	0	0	0	0
4930547E14Rik	0	0	0	0
4930548G14Rik	0	0	0	0
4930548H24Rik	1.72091	0.709021	0.883257	0
4930548J01Rik	0	0	0	0
4930548K13Rik	0	0	0	0
4930549C15Rik	0	0	0	0
4930549G23Rik	0	1.41804	0	0
4930550C14Rik	10.3254	16.3075	15.0154	11.013
4930550C17Rik	0	0	0	0
4930550L24Rik	0.860454	4.25413	0	1.8355
4930552N02Rik	0	0	0	0
4930552P12Rik	0	0	0	0
4930553C11Rik	0	0	0	0
4930553E22Rik	0	0	0	0
4930553J12Rik	0	0	0	0
4930553P18Rik	2.58136	0.709021	0	0
4930554C24Rik	0	0	0	0
4930554G24Rik	0	0	0	0
4930554H23Rik	0	0	0	0
4930554I06Rik	0	0	0	0
4930555B11Rik	0.860454	0	0	0
4930555B12Rik	0	0	0	0
4930555G01Rik	0	0	0	0
4930555G21Rik	0	0	0	0
4930555K05Rik	0	0	0	0
4930555K19Rik	0	0	0	0
4930556C24Rik	0	0	0	0
4930556G01Rik	0	0	0	0
4930556J02Rik	0	0	0	0
4930556L07Rik	0	0	0	0
4930556M19Rik	20.6509	31.1969	19.4317	22.026
4930556N09Rik	0	0	0	0
4930556N13Rik	0	0	0	0
4930557F10Rik	0	0	0	0
4930557J02Rik	0	0	0	0
4930557K07Rik	0	0	0	0
4930558C23Rik	0	0	0	0
4930558F17Rik	0	0	0	0
4930558G05Rik	0	0	0	0
4930558J18Rik	19.7904	23.3977	28.2642	29.368
4930558K02Rik	0	0.709021	0	0
4930559C10Rik	0	0	0	0
4930562C15Rik	0	0	0	0
4930562F07Rik	0	0	0	0
4930563D23Rik	0	0	0	0
4930563E18Rik	0	0.709021	0	0
4930563E22Rik	12.9068	17.7255	13.2489	14.684
4930563F08Rik	0	0	0	0
4930563H07Rik	0	0	0	0
4930563J15Rik	0	0	0	0
4930563M20Rik	0	0	0	0
4930563M21Rik	0	0	0	0
4930564C03Rik	0	0	0	0
4930564D02Rik	0	0	0	0
4930565D16Rik	0	0	0	0
4930565N06Rik	0	0	0	0
4930567H12Rik	0	0	0	0
4930567H17Rik	0	0	0	0
4930567J20Rik	0	0	0	0
4930567K12Rik	0	0	0	0
4930567K20Rik	0	0	0	0
4930568D16Rik	0	0	0	0
4930568E12Rik	0	0	0	0
4930568G15Rik	0	0	0	0
4930570G19Rik	15.4882	9.9263	4.41629	5.50649
4930571K23Rik	0	0	0	0
4930571O06Rik	0.860454	0	0	0
4930572K03Rik	0	0	0	0
4930572O03Rik	0	0	0	0
4930572O13Rik	0	0	0	0
4930573H18Rik	0	0	0	0
4930573O16Rik	0	0	0	0
4930577N17Rik	12.9068	8.50826	27.381	25.697
4930578C19Rik	0	0	0	0
4930578E11Rik	0	0	0	0
4930578G10Rik	0	0	0	0
4930578I06Rik	0	0	0	0
4930578L24Rik	0.860454	3.54511	7.06606	1.8355
4930578M01Rik	0.860454	0.709021	0	0
4930578N18Rik	0	0	0	0
4930579D09Rik	0	0	0	0
4930579F01Rik	0	0	0	0
4930579G18Rik	0	0	2.64977	0
4930579G24Rik	244.369	217.67	264.977	227.602
4930579H20Rik	0	0	0	0
4930579J19Rik	0	0	0	0
4930579K19Rik	3.44182	2.83609	6.1828	5.50649
4930579P08Rik	0	0	3.53303	0
4930581F22Rik	10.3254	12.7624	15.0154	23.8615
4930583I09Rik	0	0	0	0
4930583K01Rik	0.860454	0	0	0
4930583P06Rik	0	0	0	0
4930584F24Rik	0	0	0	0
4930586N03Rik	0	0	0	0
4930587E11Rik	0	0	0	0
4930589L23Rik	0	0.709021	0	0
4930590A17Rik	0	0	0	0
4930590J08Rik	0.860454	0.709021	0.883257	0
4930590L20Rik	0	0	0	0
4930591A17Rik	0	0	0	0
4930591E09Rik	0	0	0	0
4930592A05Rik	0	0.709021	0	0
4930592C13Rik	0	0	0.883257	0
4930592I03Rik	0	0	0	0
4930593A02Rik	0	0.709021	0	0
4930593C16Rik	0	0	0	0
4930594C11Rik	5.16272	2.83609	3.53303	3.671
4930594O21Rik	0	0	0	0
4930595D18Rik	0	0	0	0
4930595M18Rik	0	0	0	0
4930596D02Rik	0	0	0	0
4930596I21Rik	0.860454	0	0.883257	1.8355
4930597A21Rik	0	0	0	0
4930597G03Rik	0	0	0	0
4930598F16Rik	0	0	0	0
4930599N23Rik	2.58136	2.12706	3.53303	5.50649
4931402G19Rik	0	0	0	0
4931403E22Rik	0	0	0	0
4931403G20Rik	0	0	0	0
4931406B18Rik	0	0	0	1.8355
4931406C07Rik	218.555	222.633	155.453	192.727
4931406H21Rik	0.860454	2.12706	0	0
4931406P16Rik	942.197	918.183	548.503	892.052
4931408C20Rik	0	1.41804	0	0
4931408D14Rik	0	0	0	0
4931409K22Rik	0	0	0	0
4931414P19Rik	174.672	200.653	199.616	168.866
4931417E11Rik	0	0	0	0
4931419H13Rik	0	0	0	0
4931420L22Rik	0	0	0	0
4931422A03Rik	0	0	0	0
4931423N10Rik	0.860454	0	0	0
4931428F04Rik	274.485	270.846	276.46	266.147
4931428L18Rik	0	0	0	0
4931429L15Rik	0	0	0	0
4931429P17Rik	0	0	0	0
4931430N09Rik	0	0	0	0
4931431B13Rik	0	0	0	0
4931431C16Rik	0	1.41804	0	0
4931440F15Rik	0	0	0.883257	1.8355
4931440J10Rik	0.860454	0.709021	0	0
4931440P22Rik	30.1159	26.9428	27.381	14.684
4932411N23Rik	0	0	0	0
4932412D23Rik	0	0	0	0
4932413F04Rik	0	0	0	0
4932414J04Rik	0	0	0	0
4932414N04Rik	0	0	0	0
4932415M13Rik	0	0	0	0
4932429P05Rik	0	0	0	0
4932435O22Rik	0	0	0	0
4932438A13Rik	476.691	481.425	208.449	488.242
4932438H23Rik	0	0	0	0
4932441J04Rik	5.16272	0	0.883257	0
4932702P03Rik	0	0	0	0
4933400A11Rik	0	0	0	0
4933400B14Rik	0	0	0	0
4933400C23Rik	0	0	0	0
4933400F21Rik	0	0	0	0
4933400L20Rik	0	0	0	0
4933401B06Rik	0	0	0	0
4933401D09Rik	0	0	0	0
4933401H06Rik	0	0	0	0
4933402C06Rik	0	0	0	0
4933402D24Rik	0	0	0	0
4933402E13Rik	8.60454	9.9263	0.883257	1.8355
4933402J07Rik	0.860454	0	0	0
4933402J10Rik	0	0	0	0
4933402J15Rik	0	0	0	0
4933402N03Rik	0	0	0	0
4933402N22Rik	0	0	0	0
4933403O08Rik	0	0	0	0
4933404G15Rik	0	0	0	0
4933404K08Rik	0	0	0	0
4933404K13Rik	0	0	0	0
4933404O12Rik	204.788	228.305	212.865	240.45
4933405D12Rik	2.58136	0.709021	0.883257	0
4933405E24Rik	0	0	0	0
4933405L10Rik	0.860454	0.709021	1.76651	0
4933405O20Rik	0	0	0	0
4933406C10Rik	0.860454	2.83609	0	0
4933406D12Rik	0	0	0	1.8355
4933406F09Rik	0	0	0	0
4933406G16Rik	0	0	0	0
4933406I18Rik	0	0.709021	0	1.8355
4933406J09Rik	0	0	0	0
4933406J10Rik	0	0	0	0
4933406K04Rik	0	0	0	0
4933406M09Rik	0	0	0	0
4933407E24Rik	0	0	0	0
4933407G14Rik	0	0	0	0
4933407I05Rik	0	0	0	0
4933407K13Rik	51.6272	60.2668	33.5638	36.71
4933407L21Rik	0.860454	0	0	0
4933408B17Rik	7.74409	5.67217	5.29954	3.671
4933408J17Rik	5.16272	6.38119	9.71583	9.17749
4933408N05Rik	0	0	0	0
4933409F18Rik	0	0	0	0
4933409G03Rik	0	0	0	0
4933409K07Rik	2.58136	0.709021	0	0
4933411E08Rik	0	0	1.76651	3.671
4933411G06Rik	0	0	0	0
4933411K16Rik	3.44182	2.83609	1.76651	1.8355
4933412E12Rik	50.7668	39.7052	48.5792	49.5584
4933412E24Rik	0	0	0	0
4933412O06Rik	0	0	0	0
4933413J09Rik	0	0	0	1.8355
4933413L06Rik	0	0	0	0
4933415F23Rik	0	0	0	0
4933416C03Rik	0	0	0	0
4933416E03Rik	0	0	0	0
4933416I08Rik	0	0	0	0
4933416M06Rik	0	0	0	0
4933416M07Rik	0.860454	0	0	0
4933416O17Rik	0	0	0	0
4933417A18Rik	0	0	0	0
4933417D19Rik	1.72091	0.709021	0	0
4933417E11Rik	0	0	0	0
4933417G07Rik	0	0	0	0
4933417O13Rik	0	0	0	0
4933421I07Rik	0	0	0	0
4933421O10Rik	26.6741	30.4879	42.3964	27.5325
4933422A05Rik	1.72091	0.709021	0	1.8355
4933424G05Rik	0	0.709021	0	0
4933424G06Rik	0	1.41804	0	1.8355
4933424L21Rik	0	0	0	0
4933425B07Rik	0	0	0	0
4933425L06Rik	0	0	0	0
4933427D06Rik	3.44182	0	0.883257	1.8355
4933427D14Rik	394.088	415.487	319.739	370.771
4933427E11Rik	1.72091	2.12706	1.76651	0
4933427E13Rik	0	0	0	0
4933427I22Rik	0	0	0	0
4933428C19Rik	0	0	0	0
4933428G20Rik	1.72091	2.12706	1.76651	0
4933428M09Rik	0	0	0	0
4933429K18Rik	0	0	0	0
4933429O19Rik	0	0	0	0
4933430H16Rik	0	0	0	0
4933430I17Rik	5.16272	0.709021	5.29954	0
4933430M04Rik	0	0	0	0
4933430N04Rik	0	0	0	0
4933431E20Rik	184.137	201.362	165.169	167.03
4933431G14Rik	0	0	0	0
4933432G23Rik	0	0	0	0
4933432I03Rik	0	0.709021	0	0
4933432I09Rik	0.860454	1.41804	0.883257	0
4933432K03Rik	0	0	0	0
4933433F19Rik	0	0	0	0
4933433G08Rik	0	0	0	0
4933433G15Rik	0	1.41804	0	0
4933433G19Rik	0	0	0	0
4933433H22Rik	1.72091	0	0	0
4933434E20Rik	632.434	643.791	919.471	813.126
4933436E23Rik	0	0	0	0
4933436H12Rik	0	0	0	0
4933436I01Rik	0	0	0	0
4933438B17Rik	0	0	0	0
4933438K21Rik	0	0	0	0
4933439C10Rik	145.417	160.239	130.722	135.827
4933439K11Rik	0	1.41804	0	0
4933440J02Rik	0	0	0	0
4933440M02Rik	0	0	0	0
5031410I06Rik	0	0	0	0
5031425E22Rik	106.696	85.7916	116.59	91.7749
5031425F14Rik	0	0	0	0
5031426D15Rik	0	0	0	0
5031434C07Rik	0	0	0	0
5031434O11Rik	2.58136	1.41804	0.883257	3.671
5031439G07Rik	2903.17	2836.79	2996.01	2666.98
5033403F01Rik	5.16272	6.38119	0.883257	3.671
5033403H07Rik	0	0	0	0
5033404E19Rik	0	0	0	0
5033406O09Rik	9.46499	7.79923	8.83257	5.50649
5033417F24Rik	0.860454	2.83609	5.29954	5.50649
5033428I22Rik	5.16272	4.25413	5.29954	7.34199
5330411J11Rik	0	0	0	0
5330413P13Rik	0	0	0	0
5330416C01Rik	0	0	0	0
5330417C22Rik	4.30227	1.41804	1.76651	1.8355
5330434G04Rik	0	0	0	0
5330439B14Rik	0	0	0	0
5430401F13Rik	0	0	0	0
5430402E10Rik	0	0	0	0
5430402O13Rik	5.16272	2.12706	0	1.8355
5430403N17Rik	5.16272	2.83609	3.53303	9.17749
5430405H02Rik	16.3486	19.8526	22.0814	18.355
5430416N02Rik	234.904	243.903	333.871	291.844
5430419D17Rik	0	0	0	0
5430421F17Rik	0	0	0	0
5430425K12Rik	0	0	0	0
5430427M07Rik	0	0	0	0
5430427O19Rik	0	1.41804	0.883257	3.671
5430428K19Rik	0	0	0	0
5430431A17Rik	0	0	0	0
5430434I15Rik	0	0	0	0
5430437J10Rik	0	0	0	0
5430440P10Rik	0.860454	0	0	0
5530400C23Rik	0	0	0	0
5530401A14Rik	0	0	0	0
5530601H04Rik	72.2781	95.0089	101.575	102.788
5730403I07Rik	0	0	0	3.671
5730405O15Rik	2.58136	1.41804	5.29954	0
5730408K05Rik	47.325	63.8119	149.27	91.7749
5730409E04Rik	294.275	304.17	292.358	269.818
5730412P04Rik	0	0	0	0
5730416F02Rik	0.860454	0	0	0
5730420D15Rik	0.860454	1.41804	0.883257	1.8355
5730422E09Rik	0.860454	1.41804	2.64977	3.671
5730435O14Rik	0	0	0	0
5730455P16Rik	388.925	393.507	361.252	424
5730460C07Rik	0	0	0	0
5730480H06Rik	18.93	18.4346	14.1321	16.5195
5730488B01Rik	0	0	0	0
5730507C01Rik	12.9068	17.0165	15.8986	11.013
5730522E02Rik	1.72091	1.41804	0	3.671
5830408C22Rik	0.860454	0	0	0
5830411N06Rik	0	0	0	0
5830416I19Rik	0	0	0	0
5830417I10Rik	536.063	526.094	398.349	519.446
5830418P13Rik	9.46499	14.1804	1.76651	1.8355
5830428M24Rik	0	0	0	0
5830432E09Rik	0	0.709021	2.64977	1.8355
5830444B04Rik	0.860454	3.54511	0	1.8355
5830454E08Rik	5.16272	14.1804	15.0154	3.671
5830473C10Rik	0.860454	0.709021	0	0
5930403L14Rik	43.0227	38.9962	56.5285	36.71
5930412G12Rik	1.72091	1.41804	1.76651	0
5930430L01Rik	32.6972	35.4511	36.2136	51.3939
5930438M14Rik	0.860454	0	0	1.8355
6030407O03Rik	0	0	0	0
6030408B16Rik	0	0.709021	1.76651	3.671
6030419C18Rik	467.226	455.192	828.495	600.208
6030440G07Rik	0	0	0	0
6030443J06Rik	7.74409	7.79923	0.883257	3.671
6030458C11Rik	416.46	421.868	338.288	412.987
6030466F02Rik	0	0	0	0
6030468B19Rik	0	0	0	0
6030469F06Rik	0	0	0	0
6030471H07Rik	0	0	0	0
6030498E09Rik	0	0	0	0
6230400D17Rik	0.860454	0.709021	8.83257	3.671
6330403K07Rik	11.1859	16.3075	12.3656	5.50649
6330407A03Rik	0	0	0	0
6330409D20Rik	0	0	0	0
6330410L21Rik	0	0	0	0
6330415B21Rik	0	0	0	0
6330415G19Rik	5.16272	8.50826	4.41629	1.8355
6330418K02Rik	26.6741	36.1601	28.2642	34.8745
6330549D23Rik	8.60454	6.38119	5.29954	9.17749
6430411K18Rik	0.860454	1.41804	1.76651	3.671
6430503K07Rik	0	0	0	0
6430531B16Rik	1.72091	4.25413	1.76651	1.8355
6430548M08Rik	55.0691	38.9962	57.4117	77.0909
6430550D23Rik	4.30227	9.21728	2.64977	5.50649
6430553K19Rik	0	0	0	0
6430562O15Rik	0	0	0	0
6430571L13Rik	6.88363	9.21728	7.94932	9.17749
6430584L05Rik	0	0	0	0
6430628N08Rik	0	0	0	0
6430706D22Rik	0	0	0	0
6430710C18Rik	0	0.709021	0	0
6530402F18Rik	74.8595	70.1931	53.8787	47.723
6530403H02Rik	0	0	0	0
6530411M01Rik	0	0	0.883257	0
6720468P15Rik	6.02318	4.25413	0	1.8355
6720483E21Rik	4.30227	0.709021	0	1.8355
6720489N17Rik	94.6499	94.2998	144.854	183.55
6820408C15Rik	2.58136	5.67217	1.76651	0
6820426E19Rik	0	0	0	0
6820431F20Rik	62.8131	63.8119	42.3964	71.5844
7420426K07Rik	0	0	0	0
7420700N18Rik	0	0	0	0
7420701I03Rik	0	0	0	0
7530416G11Rik	0	0	0	0
7630403G23Rik	0	0	0	0
8030411F24Rik	0	0	0	0
8030423F21Rik	0	0	0	0
8030423J24Rik	0	0	0	0
8030442B05Rik	0	0	0	0
8030443G20Rik	0	0	0	0
8030451O07Rik	0	0	0	0
8030455M16Rik	0	0	0	0
8030462N17Rik	389.786	358.765	201.383	306.528
8030474K03Rik	0.860454	0.709021	1.76651	3.671
8430422H06Rik	0	0	0	0
8430423G03Rik	0	1.41804	0	3.671
8430426J06Rik	0	0	0.883257	0
8430429K09Rik	66.255	69.4841	74.1936	91.7749
8430430B14Rik	0	0	0	3.671
8430431K14Rik	0	0	0	0
8430436N08Rik	4.30227	3.54511	13.2489	16.5195
8430437L04Rik	0	0	0	0
9030025P20Rik	9.46499	10.6353	8.83257	11.013
9030204H09Rik	0	0	0	0
9030404E10Rik	0	0	1.76651	0
9030612E09Rik	0	1.41804	0.883257	1.8355
9030616G12Rik	0	0	0	0
9030619P08Rik	1.72091	0.709021	0	0
9030624G23Rik	23.2323	25.5248	19.4317	33.039
9030624J02Rik	1048.89	1084.8	922.121	1009.52
9030625G05Rik	0	0	0	0
9130008F23Rik	96.3708	106.353	83.0262	115.636
9130015A21Rik	0	0	0	0
9130015G15Rik	0	0	0	0
9130015L21Rik	0	0	0	0
9130019O22Rik	54.2086	53.8856	28.2642	44.052
9130019P16Rik	0	0.709021	0	1.8355
9130023H24Rik	97.2313	102.099	87.4425	93.6104
9130024F11Rik	11.1859	19.1436	14.1321	9.17749
9130204L05Rik	0	0	0	0
9130209A04Rik	0	0	0	0
9130221F21Rik	0	0	0	0
9130221H12Rik	81.7431	90.7547	124.539	97.2814
9130227L01Rik	0	0	0	0
9130230L23Rik	0	0	0	0
9130401M01Rik	1026.52	1074.17	1395.55	1115.98
9130409I23Rik	0	0.709021	0.883257	1.8355
9230009I02Rik	0	0	0	0
9230019H11Rik	0	0	0	0
9230020A06Rik	0	0	0	0
9230102K24Rik	0	0	0	0
9230102O04Rik	0	0	0	0
9230104L09Rik	0	0	0	0
9230105E05Rik	0.860454	0.709021	1.76651	0
9230110F15Rik	0	0	0	0
9230112D13Rik	0	0	0	0
9230112J17Rik	0	0	0	0
9230114K14Rik	136.812	141.095	91.8588	93.6104
9230116L04Rik	4.30227	1.41804	0.883257	3.671
9230116N13Rik	9.46499	1.41804	8.83257	9.17749
9230117E06Rik	0	0	0	0
9330020H09Rik	18.93	21.9797	16.7819	16.5195
9330102E08Rik	15.4882	17.0165	5.29954	12.8485
9330104G04Rik	25.8136	26.2338	19.4317	16.5195
9330111N05Rik	0.860454	0	0	0
9330117O12Rik	0.860454	1.41804	0	0
9330133O14Rik	38.7204	53.8856	45.9294	36.71
9330136K24Rik	2.58136	2.12706	1.76651	0
9330151L19Rik	91.2081	104.935	94.5085	89.9394
9330158H04Rik	0	0	0	0
9330159F19Rik	0.860454	0.709021	1.76651	0
9330159M07Rik	24.9532	19.1436	14.1321	31.2035
9330162012Rik	1.72091	3.54511	0.883257	7.34199
9330162B11Rik	0	0	0	0
9330175E14Rik	0	0	0	0
9330175M20Rik	0	0	0	0
9330178D15Rik	0	0	0	0
9330179D12Rik	0.860454	2.12706	3.53303	3.671
9330182L06Rik	84.3245	57.4307	44.1629	34.8745
9330182O14Rik	0	0	0	0
9330188P03Rik	6.88363	8.50826	8.83257	9.17749
9330198I05Rik	1.72091	2.12706	0.883257	0
9330199G10Rik	0	0	0	0
9430007A20Rik	0	0	0	0
9430014N10Rik	0	0	0	0
9430015G10Rik	581.667	622.521	643.011	702.996
9430018G01Rik	0	1.41804	0	0
9430019J16Rik	0	0	0	0
9430021M05Rik	0	0	0	0
9430037G07Rik	10.3254	7.79923	7.94932	9.17749
9430038I01Rik	73.999	74.4472	131.605	102.788
9430041J12Rik	0	2.83609	0.883257	0
9430060I03Rik	1.72091	0	0	1.8355
9430065F17Rik	4.30227	2.12706	5.29954	0
9430069I07Rik	0	0	0	0
9430078K24Rik	9.46499	2.83609	7.94932	7.34199
9430083A17Rik	9.46499	7.79923	7.06606	7.34199
9430091E24Rik	6.88363	9.21728	7.06606	9.17749
9530002B09Rik	0	0	0	0
9530003J23Rik	0	0	0	0
9530014B07Rik	0	0	0	0
9530020I12Rik	0	0	0	0
9530026F06Rik	0	0	0	0
9530026P05Rik	1.72091	2.12706	1.76651	3.671
9530027J09Rik	0	0	0	3.671
9530036O11Rik	0	0	0	0
9530051G07Rik	6.02318	0.709021	0.883257	0
9530052C20Rik	9.46499	9.21728	13.2489	7.34199
9530052E02Rik	1.72091	2.83609	4.41629	1.8355
9530053A07Rik	346.763	284.318	248.195	156.017
9530059O14Rik	0	1.41804	0	0
9530062K07Rik	1.72091	2.83609	3.53303	1.8355
9530068E07Rik	3721.46	3869.84	3443.82	3505.8
9530077C05Rik	17.2091	24.8157	12.3656	27.5325
9530080O11Rik	0	0	0	0
9530082P21Rik	7.74409	9.21728	17.6651	1.8355
9530091C08Rik	3.44182	7.09021	2.64977	5.50649
9630001P10Rik	0	0	0	0
9630013A20Rik	0	0	0	0
9630013K17Rik	0	0	0	0
9630028B13Rik	0	0	0	0
9630028H03Rik	0	0	0	0
9630028I04Rik	0	0	0	0
9830107B12Rik	0	0	0	0
9830132P13Rik	0	0	0	0
9830166K06Rik	0	0	0	0
9930012K11Rik	43.0227	44.6683	70.6606	56.9004
9930014A18Rik	68.8363	48.9225	49.4624	60.5714
9930021J03Rik	405.274	395.634	226.997	288.173
9930104L06Rik	265.02	258.084	225.231	229.437
9930111H07Rik	0	0	0	0
9930111J21Rik1	3.44182	1.41804	0	1.8355
9930111J21Rik2	0	0	0	0
A030001D20Rik	30.9763	31.1969	35.3303	51.3939
A130010J15Rik	163.486	154.567	187.251	185.385
A130030D18Rik	0	0	0	0
A130077B15Rik	0	0	0	0
A1bg	0	0	0	0
A1cf	0	0	0	0
A230001M10Rik	0	0	0	0
A230009B12Rik	0	0	0	0
A230020J21Rik	0	0	0	0
A230028O05Rik	0.860454	0.709021	0.883257	1.8355
A230050P20Rik	232.323	277.227	310.907	277.16
A230051N06Rik	0	0	0	0
A230056J06Rik	0	0	0	0
A230056P14Rik	18.0695	12.0534	15.0154	7.34199
A230057D06Rik	15.4882	17.0165	2.64977	1.8355
A230070E04Rik	0	0.709021	0	0
A230072C01Rik	30.1159	28.3609	23.8479	27.5325
A230072E10Rik	0	0	0	0
A230077H06Rik	0	0	0	0
A230083G16Rik	0	0	0	0
A230103J11Rik	9.46499	9.21728	3.53303	3.671
A230107N01Rik	0	0.709021	1.76651	1.8355
A230108P19Rik	0	0	0	0
A2m	2.58136	2.83609	0	3.671
A2ml1	1.72091	0	0	1.8355
A330008L17Rik	0	0	0	0
A330009N23Rik	18.0695	7.79923	18.5484	12.8485
A330015K06Rik	1.72091	2.12706	2.64977	1.8355
A330023F24Rik	3.44182	1.41804	1.76651	0
A330032B11Rik	0.860454	0	0	0
A330033J07Rik	1.72091	0	0	1.8355
A330035P11Rik	15.4882	14.1804	7.94932	18.355
A330040F15Rik	0	0	0.883257	0
A330041J22Rik	5.16272	12.0534	13.2489	11.013
A330048O09Rik	0.860454	0.709021	0	0
A330049N07Rik	0	0	0	0
A330069E16Rik	4.30227	12.7624	9.71583	3.671
A330070K13Rik	0	0	0	0
A330074K22Rik	8.60454	9.21728	7.94932	18.355
A330076C08Rik	0	0	0	0
A330076H08Rik	18.93	19.8526	5.29954	5.50649
A330093E20Rik	0	0	0	0
A330094K24Rik	0	0.709021	0	0
A330102I10Rik	3.44182	1.41804	1.76651	1.8355
A3galt2	2.58136	8.50826	1.76651	1.8355
A430005L14Rik	357.088	376.49	526.421	401.974
A430033K04Rik	253.834	234.686	173.118	159.688
A430035B10Rik	3.44182	2.83609	3.53303	0
A430046D13Rik	14.6277	24.8157	24.7312	5.50649
A430057M04Rik	9.46499	12.7624	13.2489	14.684
A430078G23Rik	0	0	0	0
A430078I02Rik	0.860454	0.709021	0.883257	1.8355
A430085M09Rik	0	0	0	0
A430088P11Rik	0	0	0	0
A430089I19Rik	0	0	0	0
A430090L17Rik	0	0	0	0
A430093F15Rik	0	0	0	0
A4galt	12.9068	16.3075	33.5638	47.723
A4gnt	0	0	0	0
A530006G24Rik	0	0	0	0
A530010L16Rik	0	0	0	0
A530013C23Rik	5.16272	12.7624	4.41629	1.8355
A530016L24Rik	0	0	0	0
A530021J07Rik	0	0	0	0
A530032D15Rik	0	0	0	0
A530046M15Rik	0	0	0	0
A530050N04Rik	0	0	0	0
A530053G22Rik	0	0	0	0
A530058N18Rik	0	0	0	0
A530064D06Rik	0	0	0.883257	0
A530065N20Rik	0	0	0	0
A530072M11Rik	6.88363	2.83609	0.883257	1.8355
A530088E08Rik	0	0	0	0
A530099J19Rik	0	0	0	0
A630001G21Rik	12.0464	12.0534	22.0814	22.026
A630001O12Rik	0.860454	0	0	0
A630010A05Rik	0	0	0	0
A630012P03Rik	0	0	0	0
A630019I02Rik	0	0	0	0
A630023A22Rik	0.860454	0	1.76651	1.8355
A630023P12Rik	0	0	0	0
A630066F11Rik	18.93	15.5985	15.0154	29.368
A630072M18Rik	55.9295	61.6849	50.3457	40.381
A630073D07Rik	0	0	0	0
A630075F10Rik	0	0	0	0
A630076J17Rik	0	0	0	0
A630077J23Rik	0	0	0	0
A630089N07Rik	51.6272	64.5209	35.3303	51.3939
A630095E13Rik	0	0	0	0
A630095N17Rik	0	0	0	0
A730004F24Rik	0	0	0	0
A730006G06Rik	0	0	0	0
A730008H23Rik	2.58136	1.41804	0.883257	0
A730013G03Rik	0	0	1.76651	0
A730017C20Rik	0	0.709021	0	0
A730017L22Rik	24.0927	23.3977	22.9647	33.039
A730018C14Rik	0	0	0	0
A730020E08Rik	2.58136	2.12706	7.94932	5.50649
A730020M07Rik	0	0	0	0
A730035I17Rik	2.58136	2.12706	2.64977	1.8355
A730036I17Rik	0	0	0	0
A730043L09Rik	0	0	0	0
A730046J19Rik	0.860454	6.38119	1.76651	1.8355
A730056A06Rik	6.88363	4.96315	2.64977	3.671
A730063M14Rik	26.6741	21.2706	19.4317	25.697
A730081D07Rik	2.58136	0.709021	0	3.671
A730082K24Rik	0.860454	0.709021	0	0
A730085K08Rik	0	0	0	0
A730090N16Rik	8.60454	7.79923	3.53303	7.34199
A730098A19Rik	0	0	0	0
A830009L08Rik	0	0	0	0
A830010M20Rik	54.2086	56.7217	42.3964	33.039
A830011K09Rik	0	0	0	0
A830018L16Rik	2.58136	3.54511	1.76651	1.8355
A830019L24Rik	0	0	0	0
A830019P07Rik	0	0	0	1.8355
A830029E22Rik	0	0	0	0
A830035O19Rik	8.60454	7.79923	0.883257	7.34199
A830036E02Rik	0	0	0	0
A830052D11Rik	4.30227	4.25413	6.1828	5.50649
A830082K12Rik	45.6041	40.4142	34.447	38.5455
A830082N09Rik	17.2091	11.3443	12.3656	11.013
A930001A20Rik	0	0	0	1.8355
A930001C03Rik	86.0454	87.2096	57.4117	45.8875
A930002C04Rik	0	0	0	0
A930003A15Rik	0	0	0	0
A930003O13Rik	0	0	0	0
A930004D18Rik	141.975	151.022	106.874	128.485
A930005H10Rik	86.0454	71.6112	113.94	75.2554
A930006I01Rik	0	0	0	0
A930006K02Rik	4.30227	3.54511	1.76651	9.17749
A930007A09Rik	65.3945	62.3939	37.0968	38.5455
A930007I19Rik	4.30227	6.38119	1.76651	7.34199
A930009A15Rik	0	0	0	0
A930011G23Rik	0	0	0	0
A930012L18Rik	1.72091	1.41804	3.53303	0
A930013F10Rik	16.3486	30.4879	13.2489	29.368
A930015D03Rik	7.74409	7.79923	3.53303	12.8485
A930016O22Rik	0	0	2.64977	0
A930017K11Rik	2.58136	0.709021	0	0
A930017M01Rik	8.60454	9.9263	3.53303	1.8355
A930018P22Rik	1.72091	0.709021	0	0
A930019D19Rik	0	0	0	0
A930024E05Rik	24.0927	35.4511	21.1982	31.2035
A930031H19Rik	0	0	0	0
A930033H14Rik	18.93	27.6518	31.7973	14.684
A930037H05Rik	4.30227	5.67217	5.29954	7.34199
A930041C12Rik	0	0	0	0
AA387883	0	0	0	0
AA388235	98.0917	74.4472	42.3964	66.0779
AA413626	0	2.12706	0	3.671
AA414768	726.223	687.042	610.331	530.459
AA465934	307.182	278.645	524.655	365.264
AA467197	0	0.709021	3.53303	0
AA536875	0.860454	0	0	1.8355
AA543186	5.16272	2.12706	11.4823	9.17749
AA543401	0	0	0	0
AA545190	0	0	0	0
AA619741	0	0	0	0
AA792892	0	0	0	0
AA986860	16.3486	14.1804	12.3656	16.5195
AB124611	2.58136	3.54511	19.4317	3.671
AF067061	0	0	0	0
AF067063	0	0	0	0
AF357355	0	1.41804	0	1.8355
AF357359	10.3254	7.79923	8.83257	14.684
AF357399	4.30227	6.38119	6.1828	12.8485
AF357425	0	0	0	0
AF357426	1.72091	0.709021	0	0
AF366264	0	0	0	0
AF529169	2.58136	2.12706	0	0
AI115009	0	0	0	0
AI182371	1.72091	1.41804	2.64977	3.671
AI197445	3.44182	0	0	0
AI314278	0	0	0	0
AI413582	209.951	229.014	251.728	185.385
AI427809	15.4882	12.7624	7.94932	1.8355
AI429214	18.0695	25.5248	17.6651	11.013
AI450353	5.16272	3.54511	4.41629	5.50649
AI463170	0	0	0	0
AI464131	712.456	657.972	453.111	532.294
AI467606	3.44182	3.54511	17.6651	5.50649
AI504432	4.30227	6.38119	1.76651	3.671
AI506816	135.952	162.366	77.7267	148.675
AI507597	0	1.41804	0	0
AI593442	14.6277	7.09021	2.64977	0
AI597479	354.507	360.892	332.105	341.403
AI606473	0.860454	0	0	0
AI646519	0	0	0	0
AI661453	28.395	21.2706	11.4823	25.697
AI662270	2.58136	1.41804	5.29954	5.50649
AI837181	649.643	670.734	829.379	675.463
AI839979	1.72091	0.709021	0.883257	1.8355
AI847159	0	0	0	0
AI854703	18.93	43.2503	24.7312	14.684
AI987944	143.696	155.985	136.022	185.385
AU015228	0	0	0	0
AU015791	0	0	0	0
AU015836	0	0	0	1.8355
AU016765	0	0	0	0
AU018091	0.860454	0.709021	0	0
AU019990	0	0	0	0
AU021063	0	0.709021	0	0
AU021092	3.44182	2.12706	2.64977	12.8485
AU022252	259.857	250.994	364.785	310.199
AU022751	0	0	0	0
AU022754	0	0	0	0
AU022793	0	0.709021	0	0
AU023762	0	0	0	0
AU040320	1175.38	1215.97	891.207	1044.4
AU040972	3.44182	0.709021	2.64977	1.8355
AU041133	30.1159	24.8157	35.3303	38.5455
AV026068	4.30227	7.79923	7.94932	5.50649
AV039307	2.58136	2.12706	0.883257	7.34199
AV051173	4.30227	0	2.64977	3.671
AV064505	0	0	0	0
AV205837	0	0	0	0
AV320801	0	0	0	0
AW011738	18.0695	7.79923	25.6145	22.026
AW046200	2.58136	2.12706	5.29954	1.8355
AW112010	0	0	0.883257	0
AW146154	45.6041	70.1931	63.5945	91.7749
AW209491	366.553	350.966	323.272	352.416
AW495222	0	0	0	0
AW549542	2.58136	0	0.883257	0
AW549877	696.107	741.636	463.71	664.45
AW551984	135.952	132.587	104.224	93.6104
AW554918	143.696	131.169	113.057	143.169
AW822252	0.860454	0.709021	0	0
AY074887	0	0	1.76651	5.50649
AY358078	0	2.12706	0	0
AY512915	0	0	0	0
AY512931	0	0	0	0
AY702102	1.72091	0	0	1.8355
AY702103	0	0	0	0
AY761184	0	0	0	0
AY761185	0	0	0	0
Aaas	1984.21	1951.94	1767.4	1852.02
Aacs	2256.11	2118.56	2481.07	2094.3
Aadac	11.1859	10.6353	0.883257	1.8355
Aadacl2	0	0.709021	0	1.8355
Aadacl3	0	0	0	0
Aadacl4	0	0	0	0
Aadat	9.46499	8.50826	6.1828	7.34199
Aaed1	165.207	209.161	169.585	205.576
Aagab	552.411	516.877	567.935	447.862
Aak1	1311.33	1258.51	659.793	1079.27
Aamdc	338.158	337.494	303.841	317.541
Aamp	3534.74	3544.4	4782.84	3384.66
Aanat	0	0	0.883257	0
Aar2	670.294	576.434	708.372	618.563
Aard	0.860454	1.41804	1.76651	1.8355
Aars	5099.91	4741.93	6167.79	6051.64
Aars2	532.621	530.348	605.031	499.255
Aarsd1	905.198	870.678	1335.49	851.671
Aasdh	192.742	169.456	144.854	154.182
Aasdhppt	529.179	484.262	620.047	539.636
Aass	108.417	113.443	30.0308	62.4069
Aatf	1068.68	981.286	1034.29	972.814
Aatk	12.9068	14.8894	16.7819	11.013
Abat	529.179	508.368	158.103	178.043
Abca1	2655.36	2202.93	561.752	1161.87
Abca12	0.860454	0	0.883257	0
Abca13	0	0.709021	2.64977	0
Abca14	0	0	0.883257	1.8355
Abca15	0	0	0	0
Abca16	0	1.41804	0	0
Abca17	0	0.709021	0	0
Abca2	1661.54	1694.56	990.132	1466.56
Abca3	969.732	949.38	495.507	737.87
Abca4	5.16272	1.41804	0.883257	5.50649
Abca5	60.2318	53.1766	32.6805	73.4199
Abca6	1.72091	6.38119	0	3.671
Abca7	715.037	725.329	770.2	912.243
Abca8a	0	0.709021	0.883257	0
Abca8b	43.8832	39.7052	7.94932	16.5195
Abca9	2.58136	2.83609	7.94932	1.8355
Abcb10	1457.61	1394.64	1428.23	1404.16
Abcb11	0	0	0	0
Abcb1a	7.74409	48.9225	9.71583	5.50649
Abcb1b	1002.43	961.433	566.168	611.221
Abcb4	11.1859	4.25413	7.06606	5.50649
Abcb5	0	0	0	0
Abcb6	589.411	659.39	699.54	578.182
Abcb7	372.577	397.761	405.415	495.584
Abcb8	696.107	643.791	770.2	741.541
Abcb9	12.9068	7.79923	4.41629	14.684
Abcc1	2703.55	2483.7	1523.62	2239.31
Abcc10	302.88	333.949	219.931	264.312
Abcc12	44.7436	38.2872	34.447	33.039
Abcc2	0	0	0	0
Abcc3	21.5113	19.8526	36.2136	23.8615
Abcc4	410.437	415.487	249.079	286.338
Abcc5	1229.59	1260.64	673.925	1005.85
Abcc6	4.30227	8.50826	0.883257	3.671
Abcc8	1.72091	0.709021	0.883257	0
Abcc9	0	0.709021	0	0
Abcd1	432.808	484.971	481.375	480.9
Abcd2	43.0227	38.9962	15.8986	29.368
Abcd3	835.501	824.592	835.561	890.217
Abcd4	345.902	368.691	337.404	293.68
Abce1	3646.6	3593.32	4068.28	4601.59
Abcf1	4830.59	4570.35	5178.54	4385
Abcf2	3749.86	3701.09	4381.84	4262.03
Abcf3	985.22	981.286	1196.81	1158.2
Abcg1	31.8368	34.033	25.6145	23.8615
Abcg2	600.597	583.525	611.214	629.576
Abcg3	0	1.41804	1.76651	7.34199
Abcg4	13.7673	24.8157	16.7819	11.013
Abcg5	0	0	0	0
Abcg8	0	0	0	0
Abhd1	58.5109	48.9225	52.1122	42.2165
Abhd10	228.02	221.215	291.475	227.602
Abhd11	788.176	816.084	860.293	640.589
Abhd11os	30.9763	27.6518	15.0154	9.17749
Abhd12	798.501	793.395	901.806	780.087
Abhd12b	0	0	0	0
Abhd13	604.899	670.734	651.844	631.411
Abhd14a	702.13	702.64	718.088	499.255
Abhd14b	209.09	234.686	190.784	192.727
Abhd15	30.9763	24.8157	42.3964	22.026
Abhd16a	724.502	720.366	811.714	708.502
Abhd16b	0	0	0	0
Abhd17a	2240.62	2351.11	2868.82	1839.17
Abhd17b	453.459	415.487	523.772	363.429
Abhd17c	1769.95	1674.71	1679.07	1310.55
Abhd18	31.8368	38.9962	37.0968	47.723
Abhd2	480.994	438.884	181.068	368.935
Abhd3	18.93	21.2706	10.5991	9.17749
Abhd4	2611.48	2615.58	1457.37	1637.26
Abhd5	1079.87	1116.71	1075.81	1138.01
Abhd6	307.182	269.428	228.764	273.489
Abhd8	1799.21	1917.9	2266.44	1723.53
Abi1	1513.54	1571.19	1320.47	1530.81
Abi2	494.761	516.168	449.578	504.762
Abi3	15.4882	15.5985	26.4977	12.8485
Abi3bp	34.4182	41.1232	56.5285	99.1169
Abl1	3607.02	3523.13	2943.01	3355.29
Abl2	1099.66	1028.08	514.939	901.23
Ablim1	540.365	499.151	203.149	337.732
Ablim2	3.44182	2.83609	0.883257	1.8355
Ablim3	1.72091	2.12706	0.883257	7.34199
Abo	0	0	0	0
Abr	1856	1700.94	1048.43	1455.55
Abra	0	0	0	0
Abracl	1060.08	1107.49	1759.45	1646.44
Abraxas1	137.673	176.546	180.185	176.208
Abraxas2	343.321	363.019	338.288	330.39
Abt1	462.064	461.573	605.915	475.394
Abtb1	262.438	268.01	249.962	233.108
Abtb2	552.411	575.725	377.151	414.823
Acaa1a	1419.75	1318.78	1542.17	1229.78
Acaa1b	47.325	36.8691	18.5484	23.8615
Acaa2	1952.37	1983.84	2084.49	2022.72
Acaca	1117.73	997.593	670.392	1013.19
Acacb	74.8595	79.4104	44.1629	66.0779
Acad10	55.0691	51.0495	33.5638	45.8875
Acad11	484.436	444.556	281.759	330.39
Acad12	54.2086	40.4142	30.914	27.5325
Acad8	1393.07	1278.37	1235.68	1040.73
Acad9	2140.81	2164.64	2237.29	2209.94
Acadl	1251.1	1264.19	1654.34	1451.88
Acadm	727.084	745.181	896.506	901.23
Acads	1903.32	1873.94	2346.81	1829.99
Acadsb	1040.29	953.634	740.17	961.801
Acadvl	1805.23	1863.31	2188.71	1800.62
Acan	15.4882	14.8894	5.29954	7.34199
Acap1	0	1.41804	0	0
Acap2	2450.57	2457.47	1712.64	2052.09
Acap3	1057.5	1009.65	970.7	939.775
Acat1	2423.04	2448.96	2751.35	2637.61
Acat2	715.898	784.178	996.314	855.342
Acat3	4.30227	2.12706	5.29954	1.8355
Acbd3	789.036	735.964	678.342	754.39
Acbd4	320.089	343.166	537.02	403.81
Acbd5	646.201	616.14	372.735	521.281
Acbd6	1351.77	1493.91	1694.09	1161.87
Acbd7	2.58136	3.54511	0.883257	1.8355
Accs	473.25	499.86	336.521	332.225
Accsl	0	0	0	1.8355
Acd	551.551	545.237	646.544	603.879
Ace	18.0695	7.79923	15.0154	14.684
Ace2	1.72091	0.709021	0.883257	1.8355
Ace3	0	0	0	0
Acer1	0	0	0	3.671
Acer2	31.8368	24.8157	9.71583	33.039
Acer3	285.671	294.953	401.882	401.974
Ache	1.72091	2.83609	0.883257	0
Acin1	3681.02	3518.87	4076.23	3555.36
Ackr1	1.72091	0.709021	0.883257	1.8355
Ackr2	0.860454	1.41804	0	0
Ackr3	60.2318	52.4676	112.174	93.6104
Ackr4	13.7673	13.4714	11.4823	5.50649
Acly	5651.46	5242.5	4026.77	4880.59
Acmsd	0	0	0	0
Acnat1	0	2.12706	0	0
Acnat2	0	0	0	1.8355
Aco1	1322.52	1286.16	1355.8	1440.87
Aco2	5183.37	5012.07	5083.15	5174.27
Acod1	0	0	1.76651	0
Acot1	820.013	806.866	702.19	572.675
Acot10	0	0	0.883257	1.8355
Acot11	18.93	19.1436	17.6651	7.34199
Acot12	0	0	0	0
Acot13	381.181	431.085	466.36	409.316
Acot2	180.695	156.694	211.099	124.814
Acot3	0	0	0.883257	0
Acot4	6.88363	2.83609	4.41629	1.8355
Acot5	0	0	0	0
Acot6	20.6509	28.3609	18.5484	31.2035
Acot7	4013.16	3933.65	5139.67	3990.37
Acot8	171.23	191.436	225.231	176.208
Acot9	1225.29	1170.59	1548.35	1530.81
Acox1	744.293	689.878	521.122	625.905
Acox2	0	0	0.883257	0
Acox3	472.389	438.884	217.281	308.364
Acoxl	0	0.709021	0	0
Acp1	723.642	764.325	1000.73	952.624
Acp2	499.063	521.84	491.974	513.939
Acp4	0	0	0	0
Acp5	12.9068	28.3609	31.7973	23.8615
Acp6	1104.82	1075.59	1346.08	1178.39
Acp7	0	0	0	0
Acpp	12.9068	5.67217	6.1828	9.17749
Acr	0	0	0	0
Acrbp	31.8368	19.8526	30.0308	25.697
Acrv1	0	0	0	0
Acsbg1	1327.68	1248.59	520.239	567.169
Acsbg2	3.44182	1.41804	0.883257	1.8355
Acsf2	576.504	579.979	445.162	495.584
Acsf3	445.715	407.687	486.675	420.329
Acsl1	225.439	219.088	248.195	299.186
Acsl3	517.133	500.569	673.042	715.844
Acsl4	707.293	662.935	553.802	701.16
Acsl5	1437.82	1354.94	1486.52	1527.13
Acsl6	67.1154	60.9758	33.5638	31.2035
Acsm1	0	0	0.883257	1.8355
Acsm2	0	0	0	0
Acsm3	21.5113	20.5616	25.6145	12.8485
Acsm4	0	0	0	0
Acsm5	0	0	0	0
Acss1	17.2091	21.9797	25.6145	25.697
Acss2	316.647	304.17	380.684	293.68
Acss2os	0	0	0	0
Acss3	4.30227	4.96315	2.64977	3.671
Acta1	19.7904	24.1067	22.9647	31.2035
Acta2	13854.2	13972.7	25582.7	21132.1
Actb	41186.5	43341.8	60208.1	55118.2
Actbl2	0	0	0	0
Actc1	1.72091	0.709021	0	1.8355
Actg1	13511.7	13869.2	14789.3	14359.1
Actg2	1123.75	1011.06	1254.23	1149.02
Actl10	0	2.83609	1.76651	0
Actl11	0	0	0	0
Actl6a	1022.22	1055.02	1274.54	1180.23
Actl6b	0	0	0	0
Actl7a	0	0	0	0
Actl7b	1.72091	2.12706	0.883257	1.8355
Actl9	0.860454	0	0	0
Actn1	6676.26	6565.54	5634.3	7090.53
Actn2	2.58136	2.12706	1.76651	1.8355
Actn3	51.6272	46.7954	30.0308	22.026
Actn4	17214.2	17078.2	15564.8	17283.1
Actr10	1087.61	1179.81	1626.08	1488.59
Actr1a	2555.55	2575.17	3028.69	3028.57
Actr1b	2719.89	2713.42	2893.55	2806.48
Actr2	2658.8	2556.73	2741.63	3039.58
Actr3	3809.23	3779.08	4858.8	4862.23
Actr3b	104.975	99.263	87.4425	93.6104
Actr5	345.902	321.896	354.186	348.745
[truncated: 22,973 more rows]

## Sheet: DEGs
Table S6: Day 2 Upp1800-GFP(+) and GFP(-) RNA-seq dataset (normalized counts and DEGs list) (Referred to Figure 4).
Day 2 Upp1-800-GFP(+) and Upp1-800-GFP(-) RNA-seq DEGs (DESeq2)
	Log2FC	p-adjusted
Gad2	5.6554	0.00344961
Tyrp1	4.50795	0.00793758
Adcy5	4.06555	0.0214832
Nkx2-9	3.6926	3.01194e-05
Ctnna2	3.2136	1.24868e-05
Nefl	3.14503	0.00294131
Hecw1	3.05662	0.0166868
Ube2ql1	3.05399	0.0243271
Rtl1	2.95421	0.00658256
Hoxd3	2.8333	1.23117e-05
Sytl2	2.83233	5.29794e-06
Kctd8	2.82896	0.000106045
Nfasc	2.79606	1.27282e-05
Nptx1	2.6753	3.01285e-17
Lonrf2	2.65983	0.001998
Ccdc85a	2.54235	0.000723418
Tmem255a	2.49158	0.0340579
Apba2	2.47223	0.0123791
Scn3b	2.46521	0.024886
Upk1b	2.44087	0.000188165
Mylk4	2.39347	0.000859458
Fzd10	2.38259	0.00294131
Grem2	2.37821	2.88564e-05
Dusp15	2.31674	2.24944e-05
Dcaf12l1	2.31555	3.57836e-08
Grin2b	2.31087	0.041652
Strip2	2.2909	4.78217e-08
Miat	2.25176	2.91334e-09
Shank2	2.25115	0.0142383
Kcnk13	2.22802	0.000596269
Apc2	2.2266	2.91334e-09
Cpz	2.19772	2.3061e-13
Prox1	2.18823	0.00273913
Anks1b	2.16134	5.51753e-07
Ppp2r2c	2.13596	0.0278254
Dync1i1	2.13508	4.18106e-05
Bhlha15	2.13287	0.0400999
Btn1a1	2.13185	0.0113374
Zic1	2.13035	0.000150885
Nlrc5	2.12813	0.0241564
Naalad2	2.11206	0.00448713
Gpr149	2.09056	0.00783528
Tmc3	2.08643	0.00173581
Pla2r1	2.0735	0.000576667
Slc16a12	2.06826	0.00467403
Map3k13	2.06436	3.81445e-05
Rbm20	2.01231	0.00498803
Sowaha	2.01024	0.0202575
Avil	2.00438	8.65859e-31
Gdf7	1.99998	0.000511735
Syt1	1.97802	5.99685e-08
Gabrb3	1.96796	0.000329918
Svop	1.95842	0.00177984
Rapgef5	1.92901	0.0294028
Ryr2	1.92037	3.77707e-05
Dsp	1.91771	3.04752e-11
Grip1	1.90016	0.00173581
H2-Eb1	1.89467	4.16395e-06
Snhg11	1.89144	0.00312867
Chsy3	1.87792	1.47005e-08
Prrg4	1.87259	2.53162e-06
Lrrc15	1.86815	0.0304219
Abca8b	1.8594	0.0347597
Apba1	1.84782	1.60069e-11
Aldh1a1	1.82933	4.32973e-16
Rgs20	1.82846	0.0139813
Cd200r2	1.82485	0.0159161
Dtna	1.82239	1.25536e-08
Drp2	1.80448	1.08513e-06
C1qtnf3	1.79041	0.00755739
Plch2	1.78926	0.0196269
Egflam	1.78293	0.01601
Tshr	1.78118	8.76794e-05
Gpx3	1.77192	4.02938e-12
Unc5d	1.74969	6.80891e-05
Sec14l5	1.74717	0.00375786
Sp9	1.73944	0.000150381
Negr1	1.73825	4.08187e-07
Zdbf2	1.73407	5.31658e-07
Hoxd4	1.72716	0.000373217
Col4a6	1.71975	0.000298894
Snx29	1.71855	0.0303732
Lrrc7	1.71657	0.0200715
Cep85l	1.71527	0.014263
Sv2c	1.71039	0.00149183
Ugt1a6b	1.7073	0.000429242
Trim9	1.70549	0.000346889
Gm53	1.70133	0.000125598
Lingo3	1.70034	5.24551e-05
Adnp	1.69055	8.88433e-07
Cdh3	1.67984	7.8805e-10
Htr2a	1.67703	0.0299896
Fam196a	1.67371	0.000816201
Prss12	1.66709	7.61302e-08
Kif1a	1.66135	1.05522e-14
Mst1	1.65759	6.94442e-08
Klrg2	1.6444	2.19262e-11
Abat	1.63502	3.95755e-11
Lancl3	1.63302	0.0109556
Fras1	1.62325	5.3224e-09
Itga4	1.62301	8.95296e-08
Npy2r	1.61856	0.00668743
Scnn1a	1.61756	0.0190415
Pcsk1n	1.61686	7.52278e-07
Sytl1	1.61038	1.24226e-05
Ano3	1.60784	8.19646e-09
Lama1	1.60561	1.60069e-11
Stab2	1.60475	0.0123791
Tspyl3	1.5961	0.00565065
Hoxb3	1.58926	1.03885e-05
Cyp27a1	1.58779	3.75417e-05
Trh	1.58131	0.000312538
Syt14	1.56338	0.0223905
Fetub	1.55952	2.21021e-11
Ndst3	1.5526	0.00489268
Klf4	1.54466	0.0311359
Tmtc1	1.54148	0.00930523
Jag2	1.53692	5.80258e-11
Moxd1	1.52913	2.95836e-10
Celf5	1.52656	4.60234e-06
Ces2g	1.5208	0.0119103
Rgs7bp	1.52074	0.000828622
Ptpdc1	1.51072	6.70875e-11
Nr4a3	1.51052	0.0215109
Zfp750	1.50944	0.00054583
Arhgap26	1.50633	0.00294959
Slc10a4	1.50533	0.0489468
Abca1	1.50355	7.122e-07
Adam22	1.49326	1.79326e-05
Lrrn3	1.49299	0.0166115
Tcaf2	1.49197	3.55182e-10
Exph5	1.48908	0.00196934
Peg3	1.4882	4.60234e-06
Col9a3	1.48729	0.0294078
Arhgef33	1.48407	0.0312287
Rapgef4	1.47823	4.24302e-08
Fbxo32	1.46694	2.4469e-10
Gap43	1.46354	4.02938e-12
P2ry1	1.45791	0.00600591
Syne1	1.45783	1.04253e-06
Ctsf	1.45483	1.02297e-12
Ptprv	1.45417	0.000185529
Greb1	1.45359	0.0082974
Hoxc4	1.44468	0.0306103
Pygl	1.44287	2.73108e-06
Slc2a9	1.43824	0.00272264
Sox2	1.43749	6.05261e-12
Tmprss5	1.4366	1.40646e-05
Sult4a1	1.42568	0.0468854
Gldc	1.4198	0.00571598
Dmxl2	1.41498	2.08417e-07
Syt17	1.41342	0.0304895
Nrcam	1.4125	0.000255777
Crispld1	1.40944	0.00352376
Pcsk9	1.4085	2.3061e-13
Ltb4r2	1.40347	0.000576667
Hoxb4	1.40144	0.0110245
Dlk1	1.39795	2.95836e-10
Fam49a	1.3979	1.34183e-06
Kif5a	1.38909	0.00623922
Pde8b	1.38893	1.88753e-07
Pip5k1b	1.37861	0.000561501
Adcy2	1.37774	0.00381349
Notch3	1.37332	6.97049e-11
Dpysl5	1.36216	0.0038705
Kdr	1.35915	0.00999013
Rims1	1.35606	0.0383163
1700003M07Rik	1.35588	0.0322481
Rec8	1.34486	4.44104e-06
Hoxb8	1.34404	0.0445288
Rgs6	1.34382	0.0464644
Ptprz1	1.338	0.000763207
Tbc1d8	1.32587	1.42154e-07
Aass	1.32486	0.0145482
Msln	1.31654	7.11447e-05
St14	1.31641	1.84713e-07
Tgm3	1.31435	0.00293158
Prickle2	1.31077	2.24944e-05
Lpin1	1.30998	1.82745e-09
Pga5	1.30883	0.0374336
Npnt	1.29567	2.95836e-10
Cyfip2	1.29412	0.000469284
Fhdc1	1.29141	0.00969605
Fam84a	1.29124	0.00669037
Chst11	1.27558	3.01194e-05
Magi2	1.26593	0.00893177
Pnpla3	1.25847	0.0101287
Mxd4	1.25788	6.93691e-10
Susd4	1.25539	0.0348292
Slc29a4	1.25249	0.0289469
Acsbg1	1.24772	2.92594e-10
Prrg3	1.2453	2.39651e-05
Dmrtc2	1.24512	0.0444392
Ttyh1	1.24448	5.57713e-05
Hoxb6	1.24055	0.0275234
Prr18	1.23642	3.28612e-06
Sox21	1.23526	0.00296746
Uprt	1.23314	0.0283241
Dsc2	1.23239	0.0299896
Mmp15	1.22945	9.38637e-07
Slit3	1.21855	4.5432e-12
Osbp2	1.21643	7.841e-06
Nap1l5	1.21182	0.0289469
Ehd3	1.20742	4.95202e-05
Adrb3	1.20643	0.00460324
Map7d2	1.20062	0.00558768
Cxxc4	1.19674	0.0118497
Lrp4	1.19639	8.66273e-07
Satb1	1.19454	0.0225652
Ppfia4	1.19295	0.00011398
Hoxc5	1.19275	0.0198949
Hmgcll1	1.18617	0.0435833
Igdcc4	1.18243	1.13235e-07
Nbea	1.18129	1.97253e-05
Hoxc6	1.1779	0.00109626
Col7a1	1.16959	0.0135325
Adcy9	1.1685	0.000361121
Ogdhl	1.16727	5.63783e-11
Tox3	1.16656	0.0341043
Tmem200a	1.16608	0.00137631
Nhsl2	1.16147	0.00646978
Perp	1.15869	3.35242e-08
Maml3	1.15697	0.00873779
Akap13	1.14189	4.0267e-05
Adgrl3	1.1416	0.0316723
Wdr47	1.1323	1.43868e-05
Sema5a	1.12567	0.000195638
Nat8l	1.12449	1.31299e-05
Fam83h	1.12194	4.73649e-05
Tbc1d2	1.12133	4.40272e-07
Sesn3	1.12033	0.00134515
Mycl	1.11059	2.70097e-05
Dst	1.10934	0.000299086
Cobl	1.10892	0.000103742
Bcl11b	1.10731	0.000852133
Pamr1	1.1036	0.0403928
Prkg2	1.09981	0.00869453
Mcam	1.09918	3.35242e-08
Arhgap27	1.09624	0.000985521
Wasf3	1.09149	0.00149183
Tnik	1.09101	0.00356179
Ikbke	1.09049	3.28754e-06
Armcx4	1.09034	3.35242e-08
Adcy1	1.08275	0.000126439
Afap1l1	1.08237	8.00936e-06
Frat1	1.07986	0.0167372
Rbm24	1.07935	0.000306172
Wnt16	1.07922	3.8359e-05
Rprm	1.07721	0.00167958
Nt5dc3	1.07712	3.20242e-08
Cdc42bpg	1.07584	1.83317e-08
Itpr2	1.07465	0.000680614
Rpl39l	1.07448	0.0337636
Ppp1r14a	1.07392	0.0015839
Foxo3	1.07161	0.000398728
Thbd	1.069	7.20555e-07
Lpl	1.06771	1.42398e-05
Sema6d	1.06638	0.0482361
Igsf9b	1.06606	4.28891e-06
Slc26a2	1.05724	0.00507902
Reep2	1.05724	0.00205079
Atp9a	1.05004	4.44104e-06
Tmtc3	1.04792	3.40567e-05
Ank3	1.04598	6.76762e-05
Gm2115	1.04552	0.00421692
En1	1.04494	0.0142383
Arhgap44	1.04377	0.000338215
Dennd2c	1.04249	0.00344961
Whrn	1.0422	4.66505e-05
Phldb3	1.04199	0.00958771
Car12	1.03987	4.0267e-05
Pigb	1.03895	0.0196948
Trp53inp1	1.03295	6.51152e-08
Brwd3	1.03251	0.0120948
Vps13c	1.03205	0.0051397
Gatad2b	1.03183	0.0043178
Arap2	1.02955	7.18718e-05
Tcn2	1.02501	2.82035e-05
Kat6b	1.02439	0.00273913
Slitrk5	1.02274	0.0301116
Itpr1	1.02244	9.01477e-05
Lgr5	1.02188	0.0450178
Hspa12a	1.02109	0.0252806
Vnn1	1.01959	0.00014073
Snap91	1.01924	0.0140841
Egr2	1.01695	0.0326363
Ccdc9b	1.00566	0.0122784
Tert	1.00515	0.00110878
Inhbb	1.00497	0.00813173
Podn	1.00154	0.00874389
Epb41l4a	1.00109	0.00521021
Plcl1	1.00101	1.80538e-05
Gpm6b	1.0008	7.49864e-06
Thbs2	0.998088	7.45039e-07
Lif	0.995741	0.000550938
Mab21l3	0.995217	0.00710653
Mapre3	0.994982	0.000193355
Vtcn1	0.994243	0.0111656
Sema4g	0.991564	0.0251318
B630019K06Rik	0.990326	0.000707181
Eda	0.990104	0.00537603
Asah2	0.988911	0.0199441
Tulp4	0.988695	0.00213851
Scn1b	0.986943	3.8359e-05
Clcn5	0.98654	0.0270381
Ly75	0.986459	0.0110076
Ptprg	0.986423	0.000125598
Shisa8	0.985602	0.000192254
Lmbrd2	0.981626	0.0358532
Dapk1	0.980939	1.08033e-05
Gramd1b	0.980771	0.0419551
Coq8a	0.974678	0.0228236
Ankrd6	0.973689	0.00223236
Ptk2b	0.973361	1.04749e-05
Plekhg1	0.973229	0.0119134
Plxdc2	0.968315	3.01288e-05
Rora	0.968035	0.0318967
1700007K13Rik	0.96529	0.00445541
Slc7a4	0.964788	0.0427048
Ablim1	0.962995	0.00256422
Iqsec2	0.96124	0.000953819
Tarbp1	0.959471	0.00114692
Fgf13	0.957948	0.0270446
Ptpn14	0.956511	0.000228425
Svep1	0.953958	0.00256422
Gse1	0.95324	3.53879e-05
Ccdc3	0.950367	0.00510501
Slc12a6	0.945618	0.000632252
Lama2	0.944175	0.000439436
Gucy1b1	0.942856	0.0012985
Kif13b	0.942821	0.0169218
Nmnat2	0.942154	0.0193084
Mib1	0.936017	0.00561431
Patj	0.93463	0.003394
Azin2	0.933875	1.77712e-05
Ppp1r9a	0.924913	0.0276723
Man2b1	0.924472	1.84713e-07
Kcnq5	0.924191	0.0172562
Gpr135	0.923461	0.0379638
Kif5c	0.922479	0.00292446
Pltp	0.920286	1.77176e-06
Ccdc88c	0.919589	0.00312893
Rtkn	0.919202	6.41129e-06
Hyal1	0.918916	0.00352041
Mast4	0.918302	0.00981999
Uggt2	0.917638	0.00202423
Tcp11l2	0.916964	0.0352922
Pitpnc1	0.915546	0.00291355
Kif21b	0.915356	0.0269395
Arhgef28	0.914924	0.00773454
Inka2	0.914139	0.000125598
Ccdc85c	0.913534	0.00238948
Enc1	0.90787	0.000478674
Pla2g7	0.907351	0.018755
Spock2	0.906713	0.00229217
Pkp2	0.904679	0.000124784
Ddi2	0.903716	0.0291789
Dgkq	0.90334	0.000638115
Cacna1a	0.901847	0.000891627
Dll1	0.90164	0.00916592
Cacna2d1	0.901621	0.000733726
Ralgps2	0.901065	0.0065587
Adamts12	0.898768	0.0222757
Pgm2l1	0.898376	0.0100494
Stox2	0.897318	0.00149183
Plekhh1	0.895752	0.00115298
Zbtb4	0.895055	0.000901605
Lnpep	0.894737	0.0199831
Kank3	0.893682	0.00272264
Synm	0.892521	0.0392362
Pik3r3	0.88887	0.00149331
Ptch2	0.888726	0.0300227
Eml5	0.885078	0.0444392
Ccdc92	0.883643	0.0170541
Cox6b2	0.883439	1.21055e-05
Dock9	0.883307	0.00104601
Zfhx2	0.8819	0.012087
Ank2	0.881133	0.00860575
Dclk2	0.880811	0.000109609
Neat1	0.875353	0.000311187
Hs3st3b1	0.873595	0.00792396
Fez1	0.872496	1.90223e-05
Ttc9	0.87236	0.000125598
Col4a5	0.871695	0.000456145
Disp1	0.870451	0.000952106
Epb41	0.869614	0.000167272
Armcx1	0.869282	2.70643e-06
C77080	0.868159	9.32786e-05
Vps13d	0.866884	0.00282426
Myc	0.864599	2.08417e-07
Trim7	0.863876	0.000456494
Syngap1	0.8622	0.00657494
Ralgapa2	0.861782	0.00435684
Pak3	0.858251	9.32786e-05
Ephb6	0.857845	0.00780002
Enpp5	0.854348	0.00659207
Arhgef4	0.854162	0.0114397
Tanc2	0.850502	0.032427
Dzip1	0.842796	0.000513972
Tpp1	0.84079	2.70643e-06
Gnai1	0.840453	6.17145e-05
Plppr3	0.837739	2.19648e-05
Trerf1	0.834115	0.000134394
Trp53i11	0.832776	0.00869453
Atp7a	0.83259	0.00855069
Firre	0.832086	0.0166922
Lamb1	0.831477	7.11447e-05
Rftn1	0.830506	0.000985521
Tro	0.829023	0.0380585
Nabp1	0.828772	0.0063713
Plk2	0.827973	4.95202e-05
Plekha7	0.827651	0.000608584
Klhl29	0.827107	0.0234068
Wdr35	0.825069	0.000346889
Tbc1d16	0.821711	0.000891627
Serpine2	0.820802	4.16395e-06
Usp32	0.81802	0.00111402
Zfp704	0.817502	0.000263713
Kdm6b	0.81659	0.00149183
Adam23	0.816451	8.48147e-05
Aldh3a1	0.814841	0.000161951
Ubr4	0.813357	0.00666369
Zfp516	0.812912	0.000263713
Malt1	0.812772	0.0170137
Notch2	0.810962	0.00293425
Acox3	0.810291	0.00795422
Aplp1	0.809945	0.0147412
Hpcal1	0.807769	0.000124187
Gria3	0.805728	0.0065587
Tmtc4	0.799795	0.00223659
Tap1	0.799515	0.000100246
Foxn3	0.798808	0.0260312
Itpr3	0.797998	0.000245091
Itpripl2	0.797075	0.00103109
Huwe1	0.79568	0.0140169
Tram1l1	0.795495	0.0229938
Rragd	0.794567	0.0243271
Med12	0.794343	0.0247405
Lonrf1	0.794223	0.00710653
Rapgef2	0.793664	0.00249751
Gli2	0.792959	0.00490219
Wdfy3	0.789923	0.0109556
Dgka	0.789507	0.000886477
Slc25a42	0.78932	0.00716487
Ston1	0.789167	0.0193084
Dgkh	0.786613	0.0251339
Fam198b	0.782681	0.000161951
Phlpp1	0.782446	0.0010947
Tmem229b	0.782359	0.000899529
Hist1h2bc	0.781653	0.00659207
Arhgap24	0.780677	0.00747001
Calcoco1	0.780614	0.00043885
Tmem64	0.780088	5.28397e-05
Atp13a2	0.779314	5.17979e-05
Klf3	0.778568	0.00110618
Garem1	0.778003	0.0259441
Fam171b	0.777407	0.0369189
Bmp2k	0.777123	0.00988299
Pdzrn3	0.776441	0.000250421
Tmem63b	0.774108	5.73832e-05
Sde2	0.772767	0.000245091
Ank	0.772323	0.0042561
Fat1	0.771756	0.00886891
Sntb2	0.77172	0.0073427
Etl4	0.770376	0.0105568
Cul9	0.769617	0.0083414
Fam174b	0.769525	0.000567099
Gpatch2	0.768593	0.0125621
Fam102a	0.768361	0.0019604
Rfx5	0.767828	0.00534655
Tom1l2	0.766712	0.00043885
Matn2	0.766412	0.000976499
Tcaf1	0.766351	0.000723418
Farp2	0.766064	0.0178868
Epha1	0.765134	0.00492625
Dpy19l3	0.764849	0.0039618
Pcsk5	0.764784	0.0435833
Sybu	0.762643	0.045154
Plxna1	0.762423	0.00230772
Gtf3c1	0.76021	2.70097e-05
Atf7ip	0.759889	0.00590215
Nnat	0.758359	0.0071372
Abhd4	0.758338	0.000100246
Fam117b	0.757442	0.00103513
Mkl2	0.75723	0.0191835
Smarca2	0.756481	0.000323595
Dusp4	0.755416	0.0341475
Ltbp2	0.754934	0.000504024
Rfx7	0.754668	0.00932458
Faxc	0.753396	0.00565065
Zfp609	0.752119	0.0131073
Klhl8	0.751004	0.00957597
Vps13b	0.750859	0.0378493
Meg3	0.747866	0.00184934
Ammecr1	0.747684	0.0149218
Ncam1	0.746985	0.00352746
Srgap2	0.746861	0.00173581
Smpdl3a	0.74632	0.0129294
Hist1h1c	0.746048	0.00630808
Sh3bgrl2	0.745864	0.00074619
Pcyt1b	0.745149	0.0350744
Mdn1	0.744323	0.0297126
Bcorl1	0.741838	0.0089772
Klhl24	0.741819	0.00774379
Pitpnm2	0.741562	0.00169574
Ndrg4	0.740975	0.00485858
Abcb1b	0.740794	0.000921873
Ptges	0.740749	0.0412087
Arhgef11	0.740337	0.00646978
Zfyve26	0.739861	0.0282966
Nav2	0.739019	0.0129294
Rab7b	0.736771	0.0113502
Zfhx3	0.736579	0.00556907
Adgrg6	0.734583	0.00861587
Mid2	0.734199	0.0113312
Ankrd34a	0.734186	0.00238522
Jmy	0.733915	0.0065587
Zfp462	0.733599	0.0196024
Spen	0.733444	0.026409
Ttll4	0.731879	0.0449926
Eng	0.729467	0.00353044
Mdm2	0.729136	7.89e-05
Aldh4a1	0.728881	0.00030953
Pnpla7	0.728217	0.018843
Spred2	0.726119	0.0198429
Tmem131	0.725854	0.00815949
Zranb3	0.725697	0.00881413
Efna3	0.725345	0.0393523
Tbc1d24	0.725293	0.0165156
Speg	0.725051	0.00292446
Exoc4	0.724401	0.00312508
Sipa1l3	0.717637	0.0058036
Sgsm2	0.715402	0.000888622
Ano1	0.715296	0.00286486
Heca	0.714912	0.0112507
Ypel2	0.714852	0.0375814
Nod1	0.714292	0.0189648
Arhgef18	0.714055	0.00364977
Rnf169	0.713533	0.00276706
Sesn2	0.713365	0.000343973
Slc7a3	0.713052	0.00437882
Fam122b	0.712074	0.00182606
Hspg2	0.711547	0.00547826
Atg2a	0.710728	0.00149183
Asph	0.710529	0.000859458
Iffo1	0.710303	0.00272368
Kif1b	0.709774	0.0042434
Foxk1	0.709555	0.00408692
Cachd1	0.708722	0.00161508
Prkce	0.708515	0.00335963
Npr2	0.708333	0.00074619
Sptbn1	0.707043	0.0107483
Utrn	0.705978	0.0332335
Pacs1	0.705541	0.000778159
Tspan12	0.703432	0.0343651
Manba	0.702817	0.00671229
Dcxr	0.701	0.00867675
Sowahc	0.700564	0.00899916
Fryl	0.699697	0.0428391
Ehd4	0.699686	0.00140784
Nid1	0.699199	0.0116732
Rai1	0.699197	0.00287935
Kidins220	0.699141	0.0139503
Ptp4a3	0.694949	0.000703346
Lama5	0.691091	0.023625
Ncor2	0.690498	0.00317264
Pi4ka	0.690225	0.0137411
C530008M17Rik	0.689087	0.0232558
Arhgef12	0.688489	0.00958564
Cep170b	0.688473	0.000836565
Rb1	0.68756	0.00223659
Camk2d	0.68727	0.000245091
Arl10	0.68589	0.0384492
Slc25a36	0.685859	0.039184
Mapkbp1	0.685611	0.0199831
Fam8a1	0.685504	0.00380352
Flnc	0.685132	0.0170137
Tfpi	0.684291	0.00957597
Asap3	0.683629	0.0398062
Mical2	0.683433	0.0362528
Fbln2	0.681628	0.000175835
Aldh6a1	0.681197	0.0419027
Man2a2	0.680721	0.00595706
Osbpl5	0.680465	0.00169574
Pisd-ps1	0.679538	0.00154549
Arid5b	0.678736	0.0362775
Zfp608	0.67738	0.0422607
Klhl26	0.675261	0.00126995
Lmtk3	0.674565	0.00361628
Gch1	0.673836	0.00309566
Brpf3	0.672745	0.0497729
Txndc16	0.671035	0.0133612
Slc22a23	0.670034	0.00744564
Efs	0.668982	0.00693462
Slc12a7	0.668527	0.00256422
Inava	0.668059	0.0232558
Kdm7a	0.66767	0.0287341
Hipk3	0.667482	0.00567284
Pomgnt2	0.667383	0.00589257
Slc5a3	0.666873	0.00716487
Ttc28	0.666676	0.0289469
Dmd	0.665939	0.0102841
Tbcel	0.664388	0.00710837
Kremen1	0.664215	0.00101601
Mbnl3	0.664165	0.0362775
Snrk	0.662948	0.00400036
Postn	0.662321	0.00400036
Sidt2	0.661988	0.00137741
Cpped1	0.660705	0.0012985
Col4a1	0.658575	0.000627224
Nlgn2	0.658333	0.00448713
Pidd1	0.657733	0.00217341
Kmt2d	0.657618	0.0283292
Gsta4	0.657044	0.00342929
Gaa	0.656206	0.000493205
Crim1	0.654134	0.013302
Ppp1r13b	0.653316	0.0442712
Trappc6a	0.652556	0.0372079
Afdn	0.652508	0.0039212
Sash1	0.651934	0.0232305
Akap12	0.651412	0.0489468
Prrc2b	0.651244	0.0218984
Wdr81	0.651117	0.00978678
Baz2b	0.650954	0.0232907
B3galnt2	0.65003	0.00272368
Wdr13	0.649741	0.0223104
9930021J03Rik	0.648979	0.0370519
Pcdhgc3	0.648731	0.0127351
Tsc2	0.648494	0.00503148
Tenm4	0.647964	0.0118613
Abca3	0.647951	0.0240689
Efnb2	0.647912	0.0403928
Kdm5b	0.647211	0.0113374
Limch1	0.646904	0.00792289
Dcn	0.646712	0.0155023
Slc16a2	0.646406	0.0250031
Ankib1	0.646233	0.00825272
Snx30	0.645456	0.00942843
Dync1h1	0.645224	0.0107483
Cyld	0.644978	0.00964124
Atp11a	0.644285	0.0143469
Helz	0.643536	0.0354351
Zfand5	0.64334	0.00118652
Hey2	0.637445	0.0269395
Mroh1	0.636687	0.00254784
Kdsr	0.635727	0.0135292
Ift122	0.635252	0.0492962
Elk1	0.634936	0.0110593
Tpcn1	0.634757	0.00289171
Tmem150a	0.63322	0.0225652
Abcc4	0.633025	0.0337636
Cdh13	0.631935	0.00792289
Loxl2	0.631616	0.0071372
Aga	0.63125	0.0073427
Iqgap2	0.630487	0.018356
Dlg5	0.629826	0.0321237
Slc27a1	0.62926	0.0175406
Fam53b	0.628464	0.0105683
Usp31	0.628447	0.017866
Trim11	0.626997	0.00309278
Slmap	0.626002	0.00791787
Rmnd5a	0.625426	0.00502793
Pcgf3	0.624833	0.0239674
Klhl21	0.62256	0.00506951
St5	0.621302	0.0103701
Large1	0.621135	0.0129884
Man2b2	0.620934	0.00560029
Piezo1	0.61882	0.00361628
Myo10	0.617866	0.0152009
Mdm4	0.61751	0.00893177
Golim4	0.617088	0.0229819
Lamc1	0.615858	0.01876
Itpkb	0.614866	0.0182099
Vwa8	0.614337	0.0273644
Tanc1	0.613915	0.0402671
Dhx57	0.613742	0.015215
Lnx2	0.613513	0.0161632
Eif4g3	0.611821	0.0324777
Retsat	0.610599	0.0194801
Ncdn	0.60979	0.0027318
Vcan	0.609314	0.0395711
Klf9	0.609314	0.00966581
Acad11	0.609214	0.0381954
Trrap	0.609195	0.0380663
Dsel	0.60756	0.0405983
Traf3ip1	0.606304	0.0409206
Arhgap23	0.605036	0.0036632
Tle1	0.604358	0.00765742
Fam91a1	0.602365	0.00799472
Hs6st2	0.601984	0.00765742
Fbxl20	0.601454	0.00647253
Creb3l1	0.600994	0.0321945
Rptor	0.599787	0.00869453
Gpc2	0.598662	0.0118833
Spry4	0.598214	0.0384839
Col4a2	0.598163	0.00252817
Zhx1	0.597447	0.0279007
Zfyve1	0.596954	0.0215734
Ldhb	0.596453	0.0168662
Zbtb33	0.595149	0.040364
Golph3l	0.594858	0.00709647
Eda2r	0.594433	0.0119103
Myo5a	0.592883	0.0389858
Trio	0.592003	0.0362775
Ptch1	0.590831	0.0484876
Zfc3h1	0.589998	0.0441459
Fam193a	0.586726	0.0188056
Zfp141	0.585981	0.0445114
Sipa1l2	0.585488	0.0141821
Ypel3	0.582891	0.0286609
Sox4	0.582554	0.00643599
Ctsk	0.58132	0.0343614
Traf3	0.580823	0.0186506
Pcsk6	0.58076	0.00899916
Sulf2	0.58063	0.00479185
Pros1	0.580557	0.00733729
Myo9b	0.580455	0.0214832
Lrp1	0.580438	0.0343826
Exosc8	-0.581121	0.0115439
4930453N24Rik	-0.581647	0.0375053
Arrb2	-0.583005	0.0411296
Pdia6	-0.583012	0.00439241
Commd1	-0.583631	0.0163562
Tyms	-0.584221	0.00503148
Apod	-0.584727	0.0170137
Pole4	-0.585454	0.0301707
Cox7a2	-0.585736	0.00398826
Cd9	-0.585819	0.00352041
Npm3	-0.586698	0.0222887
Nae1	-0.586955	0.0119103
Znhit1	-0.587971	0.0290754
Prdx5	-0.590479	0.0172562
Ranbp1	-0.590624	0.0157629
Col5a3	-0.590809	0.0475162
Herpud1	-0.59084	0.0104434
Eny2	-0.591527	0.00776442
Ddx39	-0.592944	0.0058036
Hoxa10	-0.59602	0.0436844
Klf6	-0.596535	0.0127692
D17H6S56E-5	-0.597532	0.00221701
Mthfd2	-0.600098	0.00294959
Mdp1	-0.600212	0.0198289
Cenpx	-0.60038	0.0160518
Snrpd2	-0.601189	0.00283336
Eif2s2	-0.602083	0.00297464
Commd2	-0.602241	0.0127351
Cks2	-0.602475	0.0146298
Tacc3	-0.602917	0.00312867
Timp1	-0.603055	0.0122784
Oard1	-0.603142	0.0324777
Cetn3	-0.604516	0.00696904
Tmsb4x	-0.609095	0.00120201
Il11ra1	-0.609424	0.0146092
Uqcc2	-0.609894	0.0106464
Tspan4	-0.611896	0.00678009
Mrps14	-0.612038	0.00910822
Polb	-0.612128	0.0367897
Cdc26	-0.612493	0.0250031
Cavin3	-0.612701	0.0129884
Ppih	-0.613558	0.0133799
Rdm1	-0.613705	0.0436844
Fam92a	-0.613887	0.0081768
Polr2i	-0.614351	0.029938
Psph	-0.616339	0.0344672
Eloc	-0.617457	0.00309278
Dut	-0.619161	0.00893894
Fkbp3	-0.620232	0.00253701
Unc5b	-0.6214	0.0118497
Snrpd3	-0.624386	0.00335963
Rnaseh2b	-0.624653	0.0250031
Cdca3	-0.624851	0.00600177
Tk1	-0.625709	0.00370351
Nup37	-0.626533	0.00825272
Rcbtb2	-0.627602	0.00712636
Cenpa	-0.628897	0.0085436
Dpysl2	-0.629926	0.0196024
Tmem121	-0.631885	0.0435833
0610010K14Rik	-0.631989	0.0152533
Lsm8	-0.632762	0.00895112
Fkbp2	-0.633871	0.0319572
Myl9	-0.634056	0.00439513
Mrpl40	-0.635216	0.00680509
Ppp1r11	-0.635909	0.0075631
Rps27a	-0.636165	0.000700158
Glipr2	-0.636194	0.00256422
Pck2	-0.636299	0.00469625
Iah1	-0.637446	0.0393388
Gemin6	-0.637778	0.018755
Snhg1	-0.638256	0.00163186
Orc6	-0.638547	0.00457235
6030419C18Rik	-0.638736	0.0248215
Pbdc1	-0.639167	0.00891088
Srsf3	-0.641024	0.001229
Tagln	-0.641345	0.00396452
Snrpb2	-0.642048	0.00567284
H2afz	-0.642238	0.00321097
Smim15	-0.643463	0.00571598
Akip1	-0.64382	0.0285006
Mettl1	-0.643871	0.0211361
Psma1	-0.644735	0.000620499
Slc29a1	-0.645232	0.00272264
Gm14005	-0.645722	0.047391
Six1	-0.646534	0.0482361
Rcan2	-0.646609	0.0168406
Irx1	-0.647346	0.033113
Prelp	-0.648269	0.00765742
Larp7	-0.64868	0.00659207
Calm2	-0.648753	0.00084495
Gmnn	-0.650384	0.00710601
Magohb	-0.651127	0.0415401
Slirp	-0.652114	0.00543539
Abracl	-0.652844	0.00156247
Rassf7	-0.653364	0.0398065
Hmgn2	-0.654838	0.00275393
Mrps18c	-0.657957	0.00764896
Dbndd2	-0.659376	0.0270413
Clic1	-0.664694	0.000921873
Pdss1	-0.665364	0.0306103
Haus7	-0.665612	0.0191131
Tfeb	-0.666702	0.0322771
Bbip1	-0.667019	0.0160297
Naprt	-0.673444	0.0243271
Dnajc19	-0.674688	0.0141686
Mrpl42	-0.674754	0.00256422
Manf	-0.674772	0.00114151
Syce2	-0.676504	0.0422545
Phf19	-0.676827	0.0118029
Psmc3ip	-0.677627	0.0286267
Selenok	-0.678081	0.00377063
Birc5	-0.678285	0.00280491
Metrn	-0.678634	0.0093963
Psmc6	-0.679865	0.000431277
Hat1	-0.680884	0.00110525
Ostc	-0.681047	0.00256422
Dhfr	-0.683167	0.00386506
Pbk	-0.683394	0.00226587
Slc35b1	-0.683569	0.00329151
Cav1	-0.683821	0.000717404
Haus1	-0.6847	0.0120948
Bcl2l12	-0.687332	0.0308976
1810022K09Rik	-0.690119	0.00447804
Mpc1	-0.691093	0.03074
Bola3	-0.691231	0.0127228
Tmem176a	-0.691462	0.0232305
Snhg5	-0.691983	0.00112514
Snrpd1	-0.692693	0.00134515
Gpx8	-0.692854	0.00238522
Ccnb2	-0.693686	0.000936598
Bccip	-0.693742	0.00160705
Osr1	-0.693941	0.0342291
Sec61g	-0.694566	0.00270097
Sptssa	-0.695901	0.00188269
Plekho1	-0.696246	0.00891088
Esd	-0.697868	0.000122509
Rflnb	-0.698345	0.0162882
Tmem256	-0.698515	0.00250666
Cdc25c	-0.700169	0.00959229
Tmem86a	-0.70152	0.0251106
Pclaf	-0.702767	0.000627224
Selenop	-0.702779	0.00160705
Myl6	-0.705406	0.000716004
Mrpl33	-0.706749	0.00774379
Nup35	-0.710059	0.00287935
Rpp30	-0.712752	0.0140354
Rbmx	-0.712917	0.00388403
Mxd3	-0.713015	0.00907027
Cnn2	-0.71305	0.000261263
Tex30	-0.714163	0.0129884
Cenpq	-0.715694	0.00746292
Mest	-0.716511	0.00036725
Sf3b6	-0.717323	0.00089448
Cd47	-0.718326	0.00313323
Bud31	-0.719374	0.00103513
Uqcrb	-0.721687	0.000638115
Sertad1	-0.722074	0.0243048
Pitx1	-0.725054	0.0186452
F3	-0.725686	0.00422075
Tnfrsf1b	-0.729594	0.0233294
Apoe	-0.730244	0.00658242
Snrpe	-0.731408	0.000472125
Nfil3	-0.732435	0.0322481
Tmem126a	-0.734598	0.00581503
Mrpl41	-0.73545	0.00149376
Znrd1	-0.7369	0.00601889
Tubb3	-0.738751	0.0127361
Tyw5	-0.739896	0.0336051
Znhit3	-0.740685	0.00666369
Rpf2	-0.742674	0.00149183
Cycs	-0.743753	0.00089448
Sdc4	-0.745813	0.00043066
Acta2	-0.74764	9.0929e-05
Plpp1	-0.750175	0.000486756
Xbp1	-0.753119	0.00120201
Tuba1b	-0.754544	0.000223273
Cd34	-0.755052	0.000223273
Hspb8	-0.755053	0.000150885
Zfp948	-0.757152	0.0498701
Lsm3	-0.757341	0.000238244
C1d	-0.758566	0.000859458
Rpl39	-0.760657	0.000122353
Fdps	-0.760909	0.000398728
Pdgfrb	-0.761053	0.00205629
Igfbp4	-0.76253	0.000740279
Mad2l1	-0.765625	0.00011398
Tspo	-0.765813	0.00017229
Atf4	-0.766478	0.00011398
Ddah2	-0.768704	0.00340236
Hck	-0.769091	0.000677978
Chac1	-0.771824	0.00434737
Rfc4	-0.772333	0.00043885
Hebp1	-0.772878	0.0229833
Magoh	-0.772902	0.000554807
Chchd1	-0.77358	0.000332342
Pmp22	-0.775989	0.000291071
Nes	-0.7792	3.97453e-05
Cyp1b1	-0.780212	0.00222878
Socs3	-0.782516	0.00334554
Rpa3	-0.787664	0.00214654
Lrrc32	-0.789316	0.0015132
Stac2	-0.789322	0.00235006
Oaf	-0.789444	0.000901605
Ccdc34	-0.791166	0.000891627
Tm4sf1	-0.794194	0.000536661
Ndufa5	-0.800286	0.00089448
Mrpl47	-0.806204	0.000952106
Rhoc	-0.810201	0.000190891
Gstt1	-0.810935	0.0275234
Gins1	-0.811127	0.00519229
Ccl7	-0.813331	2.87793e-05
Hmgb2	-0.815549	9.77571e-05
Polr2k	-0.815995	0.00817828
Igfbp3	-0.817386	3.97453e-05
Dnase2a	-0.817815	0.0228236
Hoxa11os	-0.821155	0.00184934
Blvrb	-0.822461	0.0160322
Prorsd1	-0.829021	0.0405728
Bmp4	-0.830503	0.00514827
Zfp36	-0.833273	0.00317264
Cotl1	-0.837752	0.00272264
Sema3b	-0.838477	0.0339306
Ahr	-0.838752	0.0470738
Crabp2	-0.842498	0.000429242
Arhgdib	-0.843141	0.000429242
Snhg3	-0.84368	0.00280491
Rpl22l1	-0.850472	2.53162e-06
Ccne2	-0.85181	0.00103725
Trp53i13	-0.852799	0.00966581
Gale	-0.853364	0.00184934
Stk17b	-0.861503	0.000493205
3110039I08Rik	-0.861789	0.0346176
Lgals3	-0.866106	0.000150381
Pfdn4	-0.869909	5.84693e-05
Cox20	-0.880277	0.0258968
Csrp2	-0.882373	0.000245091
Klf2	-0.891679	0.0435149
Pdlim2	-0.891798	0.0221075
Ogn	-0.892515	0.0221075
Rnd1	-0.89256	0.0349065
Ska1	-0.895517	0.00244546
Gadd45b	-0.906312	0.000859458
Crabp1	-0.907382	7.41776e-05
Hoxa11	-0.90929	0.000807909
Fuom	-0.909875	0.0240178
Olfml3	-0.909918	8.0983e-05
Ier5l	-0.913342	0.0255074
Tmem37	-0.915812	0.0108742
Phyh	-0.920475	0.0186087
Aldh1b1	-0.923823	0.000332342
H19	-0.923977	1.46362e-07
Cd248	-0.927535	2.21338e-05
Camk2n2	-0.929198	0.0118833
Cx3cl1	-0.929878	0.0354783
Clcf1	-0.930377	0.0162712
Cdc42ep1	-0.937745	0.00315908
Pdlim4	-0.942134	0.000778159
Cdc42ep2	-0.946095	0.0476867
Cxcl12	-0.948839	0.00272264
Cenpp	-0.950258	0.0138461
Tns2	-0.950625	0.000124371
Micall2	-0.951529	0.00232088
Urah	-0.963301	0.00359461
Crlf1	-0.964131	0.000469284
Card19	-0.972112	0.00135819
Gas1	-0.973987	5.65929e-06
Cenpk	-0.989487	0.000457474
S100a4	-0.992382	5.3616e-07
Rn45s	-0.992878	0.000952106
Lsm5	-0.999266	0.000901605
Klhdc8a	-1.00379	6.31146e-06
Rtl3	-1.01598	7.77514e-05
Pttg1	-1.02127	5.55498e-07
Krt19	-1.02392	0.000263713
Rpph1	-1.03	0.000161951
Defb1	-1.03646	0.0449089
Bcl3	-1.04642	0.00103374
Msx1	-1.05014	6.06192e-05
Fcgrt	-1.05561	0.00149888
Sema3f	-1.06071	8.48147e-05
Adm	-1.06356	0.00361262
Lgals1	-1.06432	2.962e-08
Adam8	-1.0666	0.0203483
Plvap	-1.07018	0.00571598
Pdgfra	-1.08086	0.000159406
Il1r1	-1.08645	0.0422545
Cdkn3	-1.08667	0.00179598
Prrx2	-1.09008	0.000171824
Crip1	-1.09723	8.82796e-05
Fxyd5	-1.10299	0.00364977
Vill	-1.10909	0.0178868
Ahrr	-1.11557	0.0186506
Cd14	-1.11942	0.00607987
Rab3il1	-1.12249	0.00346544
Plau	-1.12794	0.00161192
5730408K05Rik	-1.13326	0.0267802
Ier3	-1.13753	0.000400437
Tspan15	-1.14808	0.0102373
Trim47	-1.15166	3.62978e-07
Mrgprf	-1.15171	0.00169987
Casp12	-1.16525	0.000222079
Ucp2	-1.19765	0.00133762
Adamts5	-1.19821	7.66126e-05
Il1rl1	-1.20106	0.00545017
Spp1	-1.22066	1.55692e-11
Trib3	-1.22815	9.9689e-06
Pth1r	-1.23394	0.0126239
Kif26a	-1.24272	0.0166922
Sfrp2	-1.2659	4.21525e-10
Mpeg1	-1.2953	0.00174128
Ripor3	-1.305	0.0352922
Atp2a3	-1.30683	0.0129884
Arsi	-1.31032	0.00657526
Rmrp	-1.31092	0.0294493
Rgs10	-1.31786	0.00541636
Ccl2	-1.32031	1.95503e-08
Medag	-1.32569	1.0616e-05
Cd36	-1.3828	0.0056519
Serpine1	-1.39363	1.0168e-06
Apln	-1.4017	0.00730734
Cbr2	-1.40342	7.24401e-05
Ctss	-1.4194	6.55156e-06
Itgb2	-1.42526	0.0161925
Cxcl1	-1.44862	0.00322015
Fermt3	-1.46788	0.00968862
Lyz2	-1.46798	1.82896e-11
Stab1	-1.47523	0.000312538
Ifitm1	-1.47637	3.46868e-08
Fcgr3	-1.51858	0.0344672
Nckap1l	-1.5612	0.0118497
Tspan11	-1.56799	0.000304848
Ms4a6d	-1.58861	0.0196445
1500015O10Rik	-1.59125	0.000429242
Inmt	-1.59647	0.0390625
Ptpn6	-1.60987	0.0132661
Ptx3	-1.61535	6.95257e-16
Mrc1	-1.65988	0.00206647
Lilrb4a	-1.66173	0.0286609
Pld4	-1.69726	0.0297815
Myo1f	-1.70535	0.00565065
Ptprc	-1.71534	0.0309094
Mgp	-1.73531	1.10453e-17
Adm2	-1.76702	0.0240689
Cd93	-1.76702	0.0240689
Itgam	-1.79067	3.62818e-07
Rac2	-1.82643	0.00703641
Itgal	-1.83763	0.00761461
Trem2	-1.8425	0.00907027
Msr1	-1.85519	0.0139815
Hk3	-1.89762	0.0209871
Lsp1	-1.93925	1.82896e-11
Adgre1	-1.94438	3.66695e-05
Fcer1g	-1.94894	0.001229
Aqp1	-1.95071	3.17975e-20
Serpina3g	-1.97075	0.00010761
Cd53	-1.98209	0.0311401
Ncf1	-1.9833	6.76762e-05
Tyrobp	-2.00726	8.00936e-06
Cxcl5	-2.00748	9.64727e-12
Cybb	-2.0612	0.000253047
Trf	-2.08549	0.000122353
C3ar1	-2.08685	0.00232088
Sftpa1	-2.12006	0.0188293
Csf1r	-2.14321	4.5432e-12
Wisp2	-2.15541	0.00016966
Hpgd	-2.21897	0.00196743
Cd72	-2.2419	5.55774e-05
Coro1a	-2.26191	4.02938e-12
C1qa	-2.27109	4.02938e-12
Clec4d	-2.27505	0.0223871
C1qc	-2.28375	1.05522e-14
Alox5ap	-2.44293	5.55774e-05
Cd300ld	-2.4493	0.001461
Hcls1	-2.45164	1.17875e-05
Nog	-2.46504	0.0116732
Vav1	-2.52225	0.026024
Lmo2	-2.53938	0.0194801
Fmnl1	-2.56212	0.000429242
Ccl9	-2.57355	2.4355e-07
C1qb	-2.58974	1.40172e-22
Ncf4	-2.61126	0.0294028
Spi1	-2.62271	5.73832e-05
Ctla2b	-2.62336	0.0167716
Pf4	-2.67208	0.00125236
Ms4a6c	-2.76784	0.00296746
C5ar1	-2.77418	0.00290766
Fcrls	-2.83209	2.92814e-06
Cd300c2	-2.83403	0.000901605
Cx3cr1	-2.84601	0.0021839
Clec12a	-2.84614	0.00978245
Was	-2.96543	0.0401205
Clec4a1	-3.04349	0.0273578
Cxcl2	-3.20158	0.000125598
Ccl3	-3.71063	0.000514393
