# Supplementary figures and images for: An Unbiased Approach to Identify Cellular Reprogramming Inducible Enhancers
Source: Preprints.org preprint supplement (doi:10.20944/preprints202410.2527.v1), 2024-10-31

**A****Genes close to  
Early-bound ESC sites****Genes close to  
Late-bound ESC sites**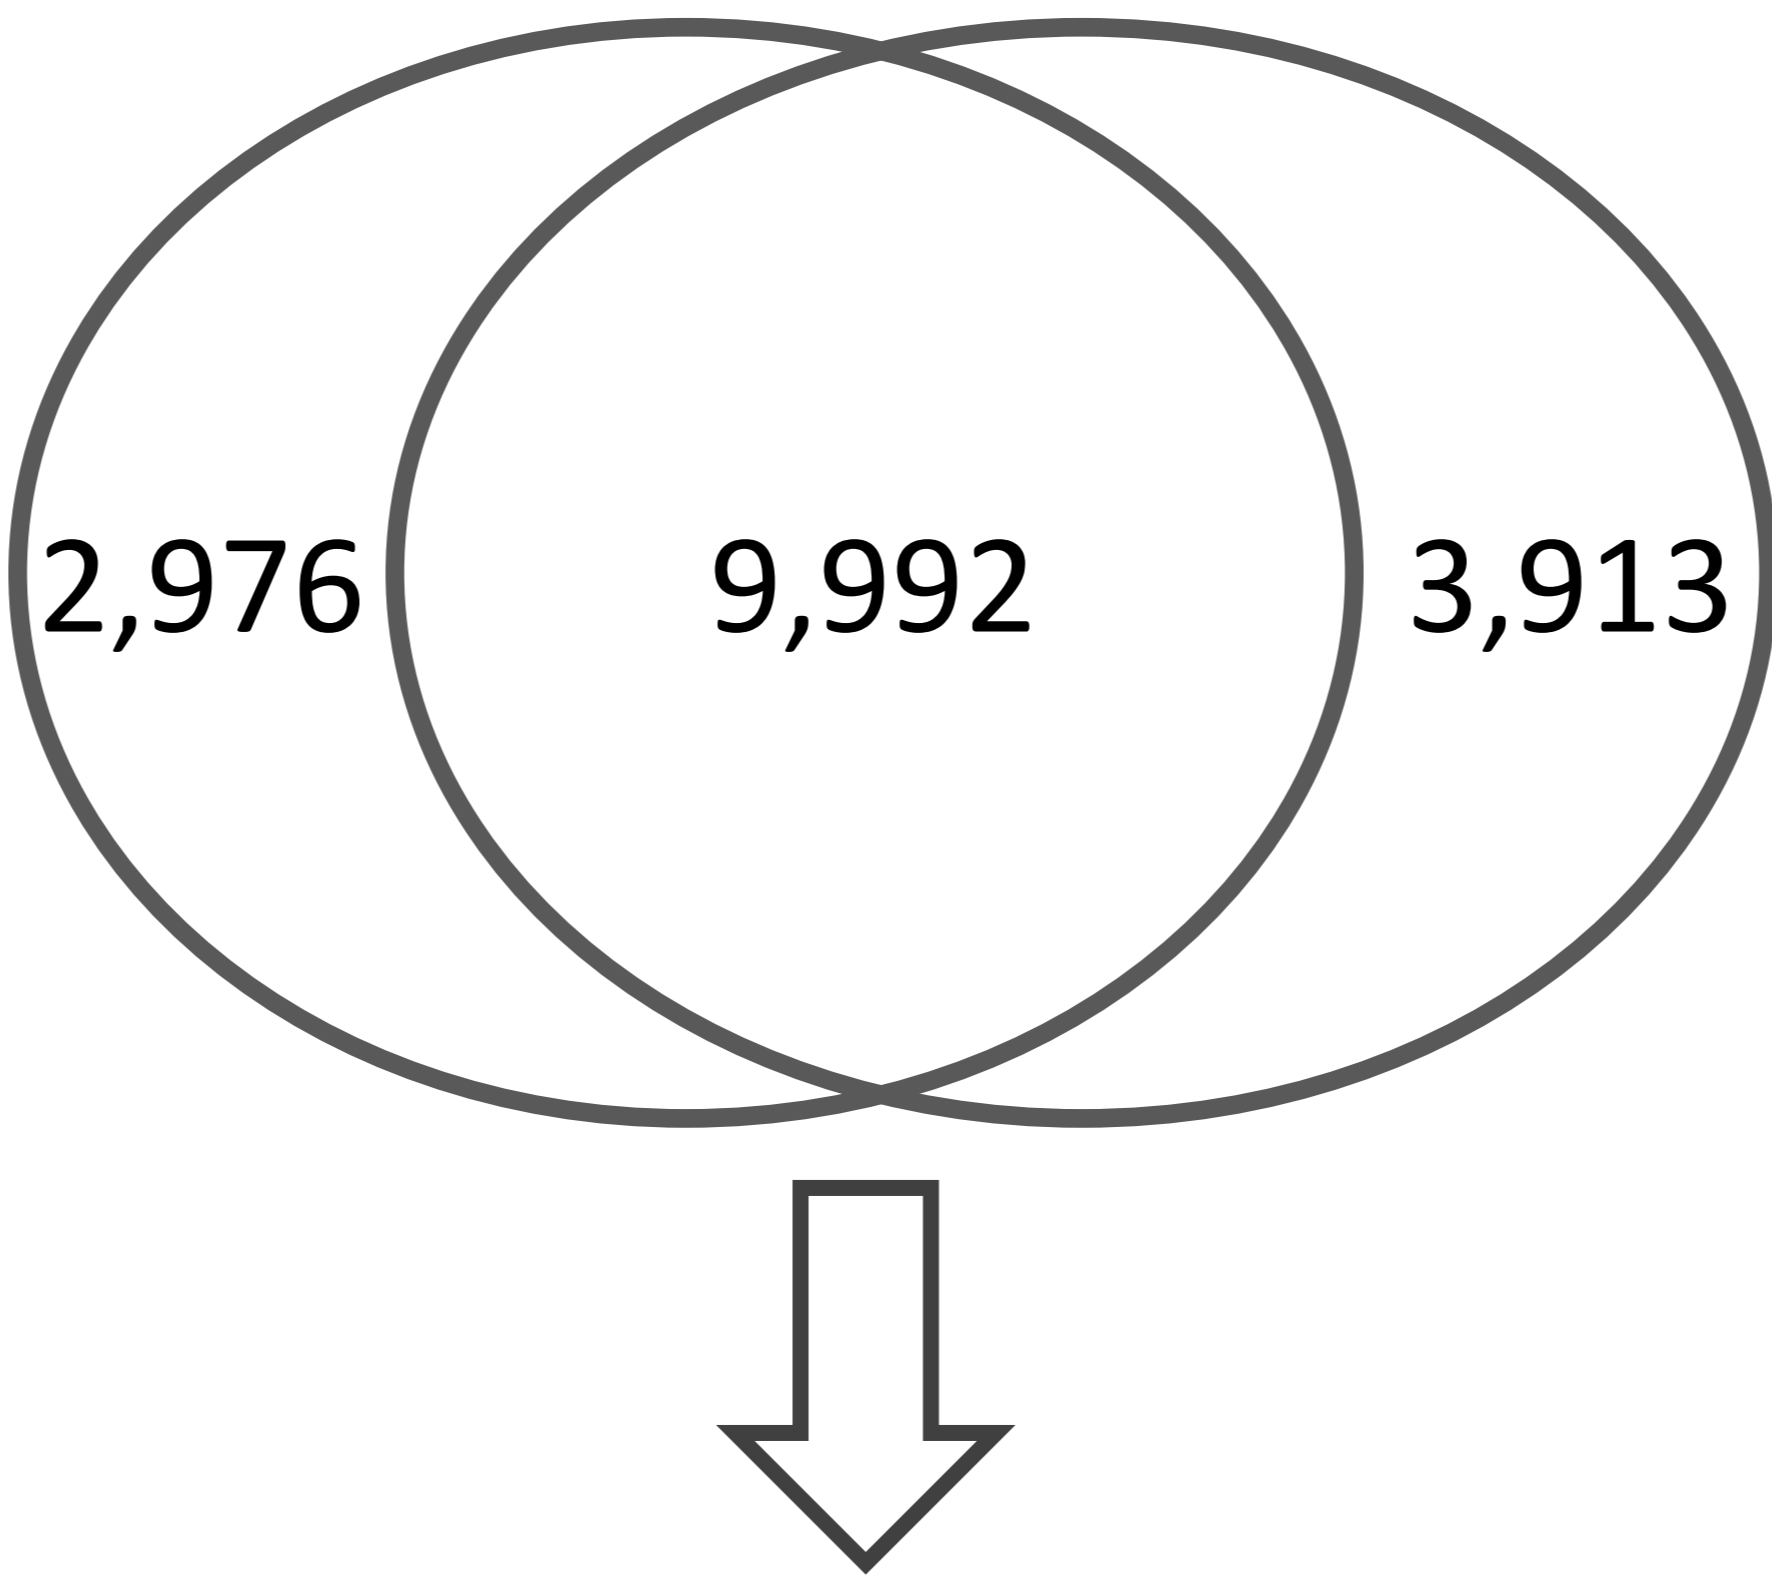**B**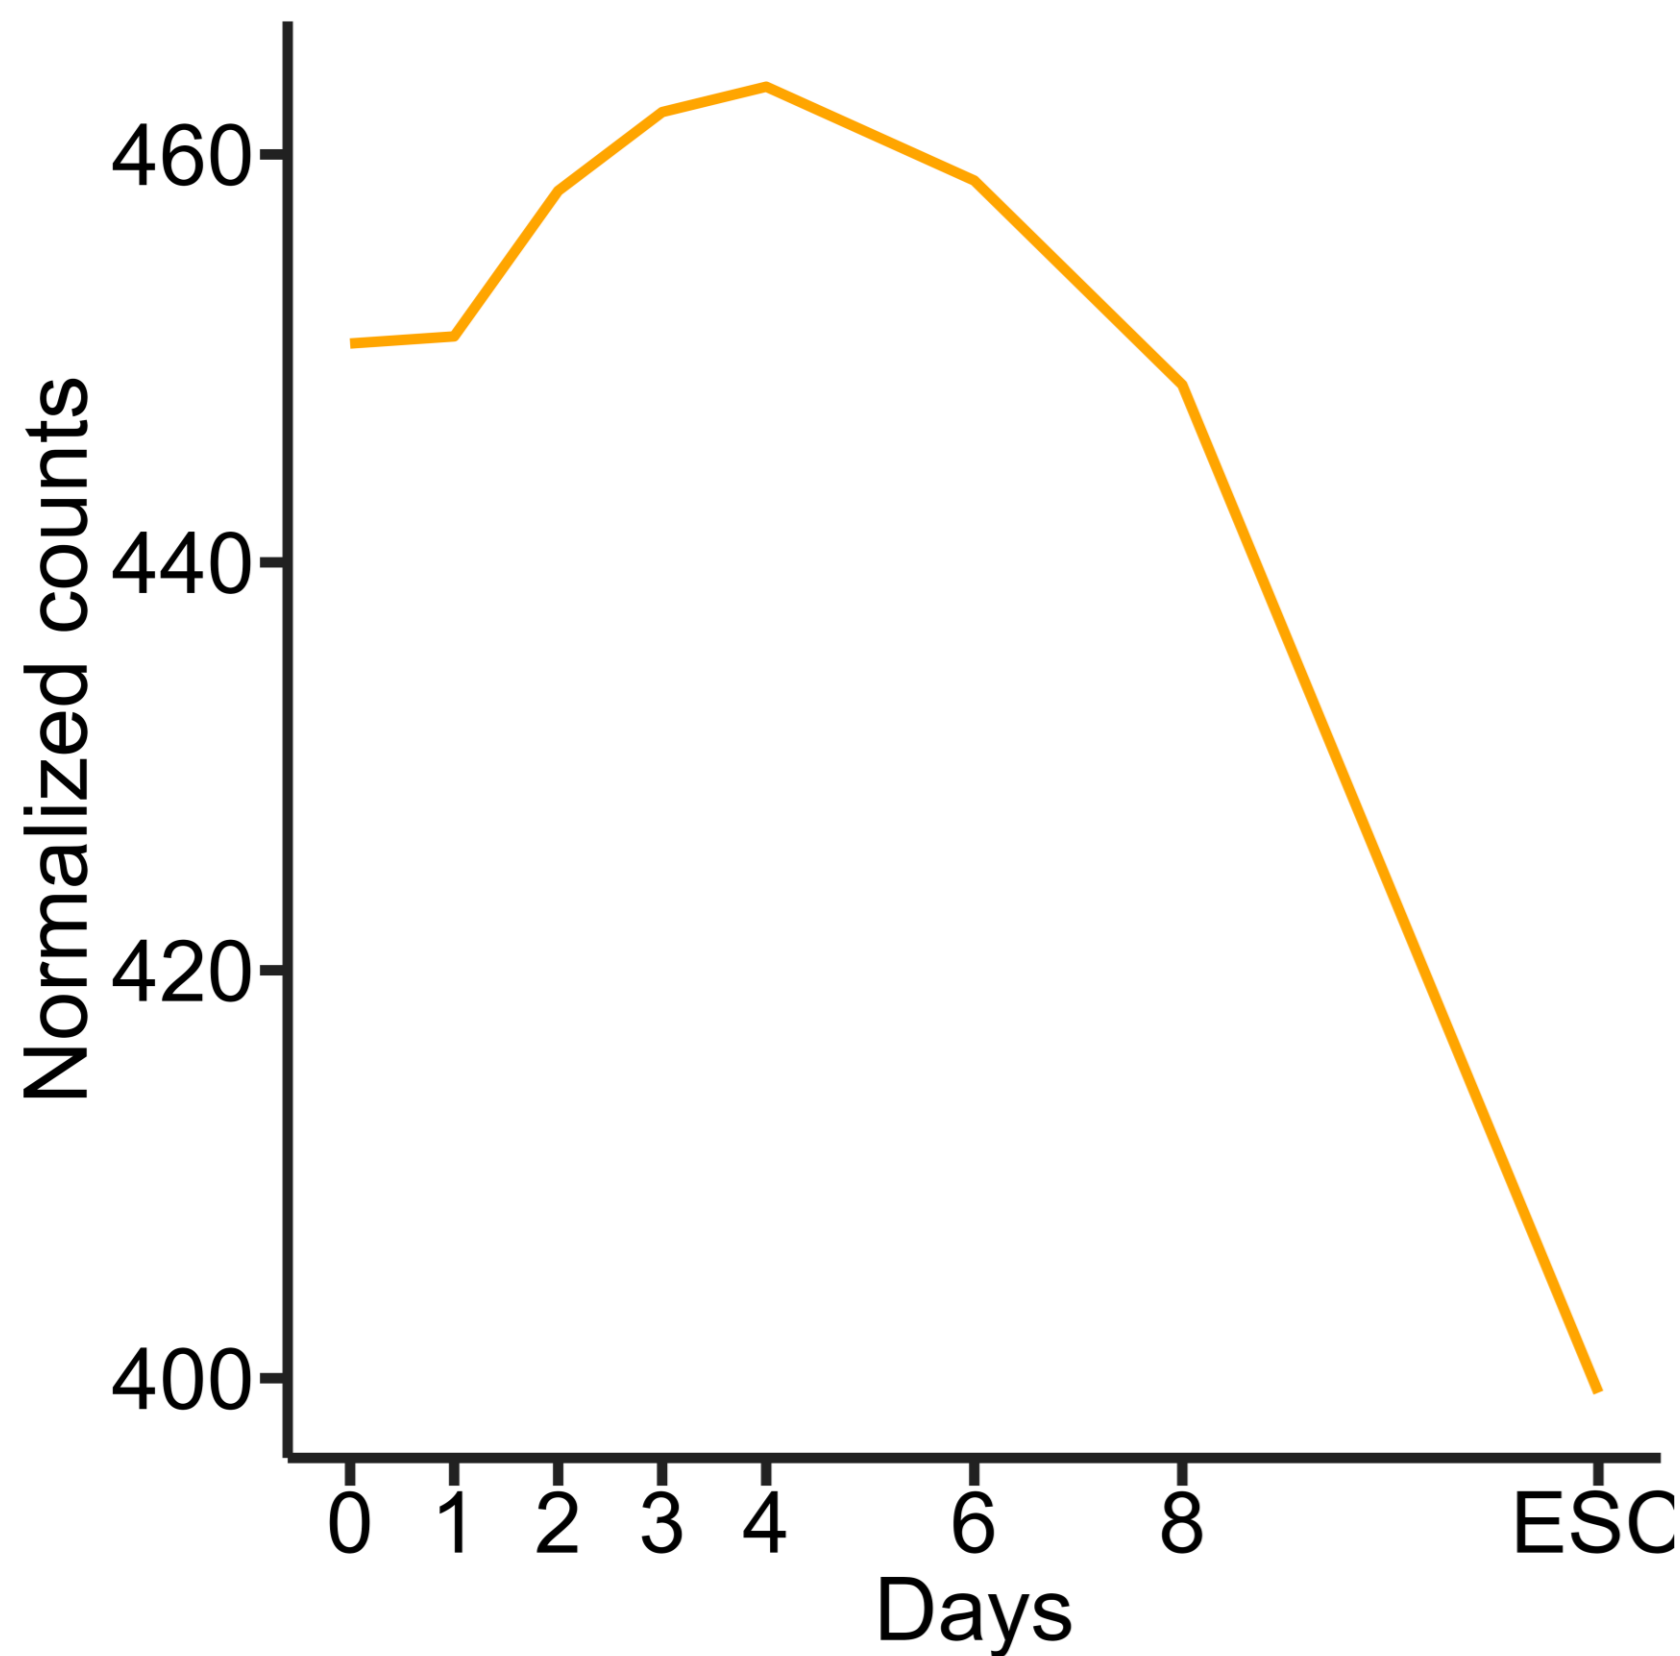**C**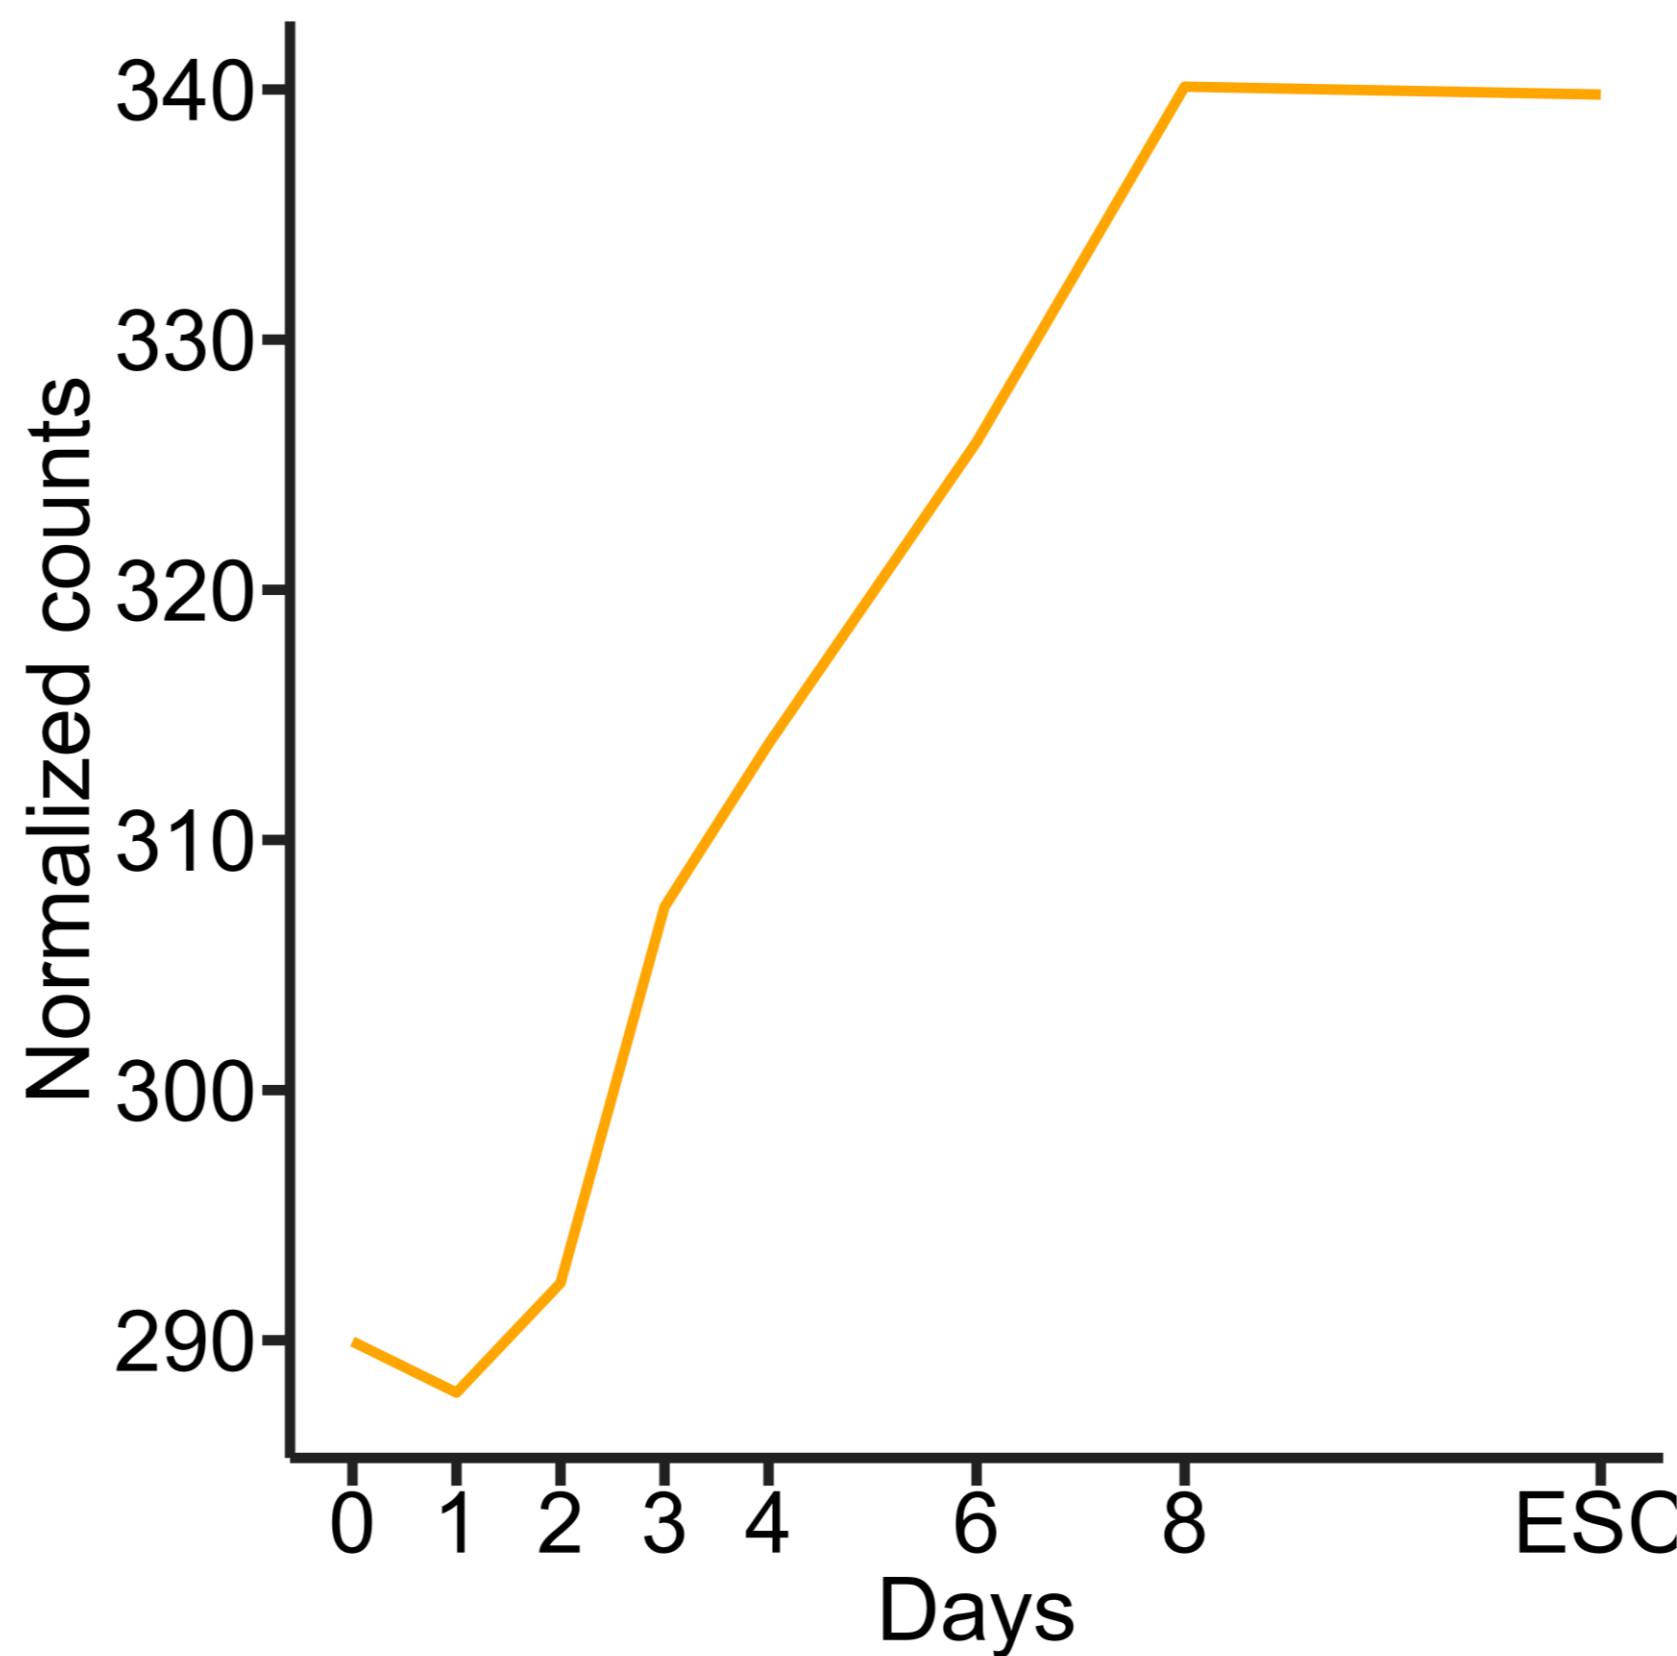**D**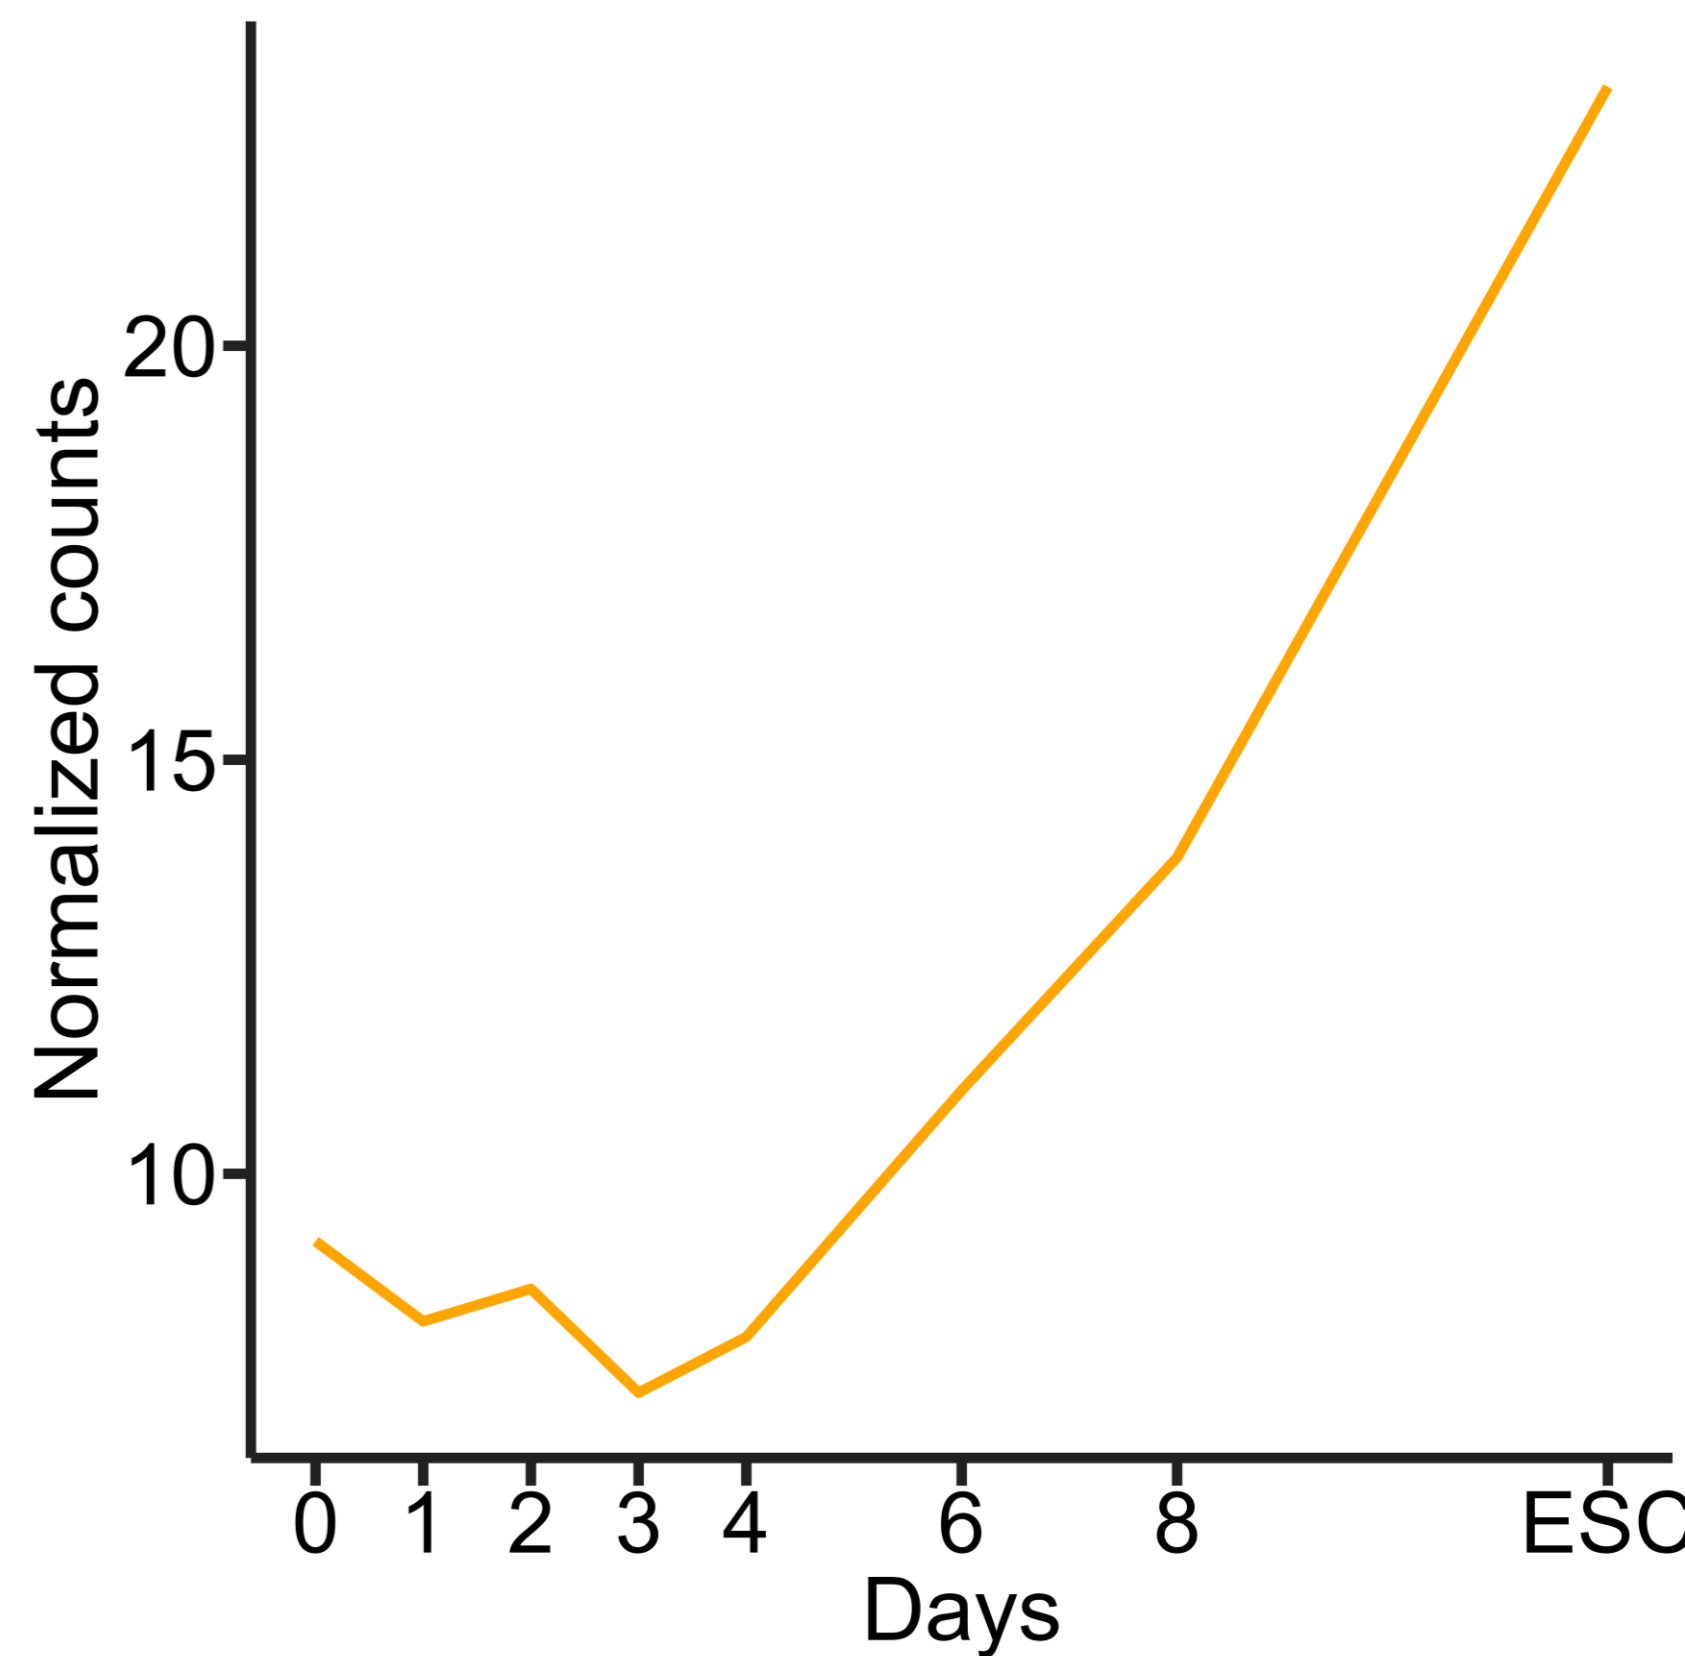**E**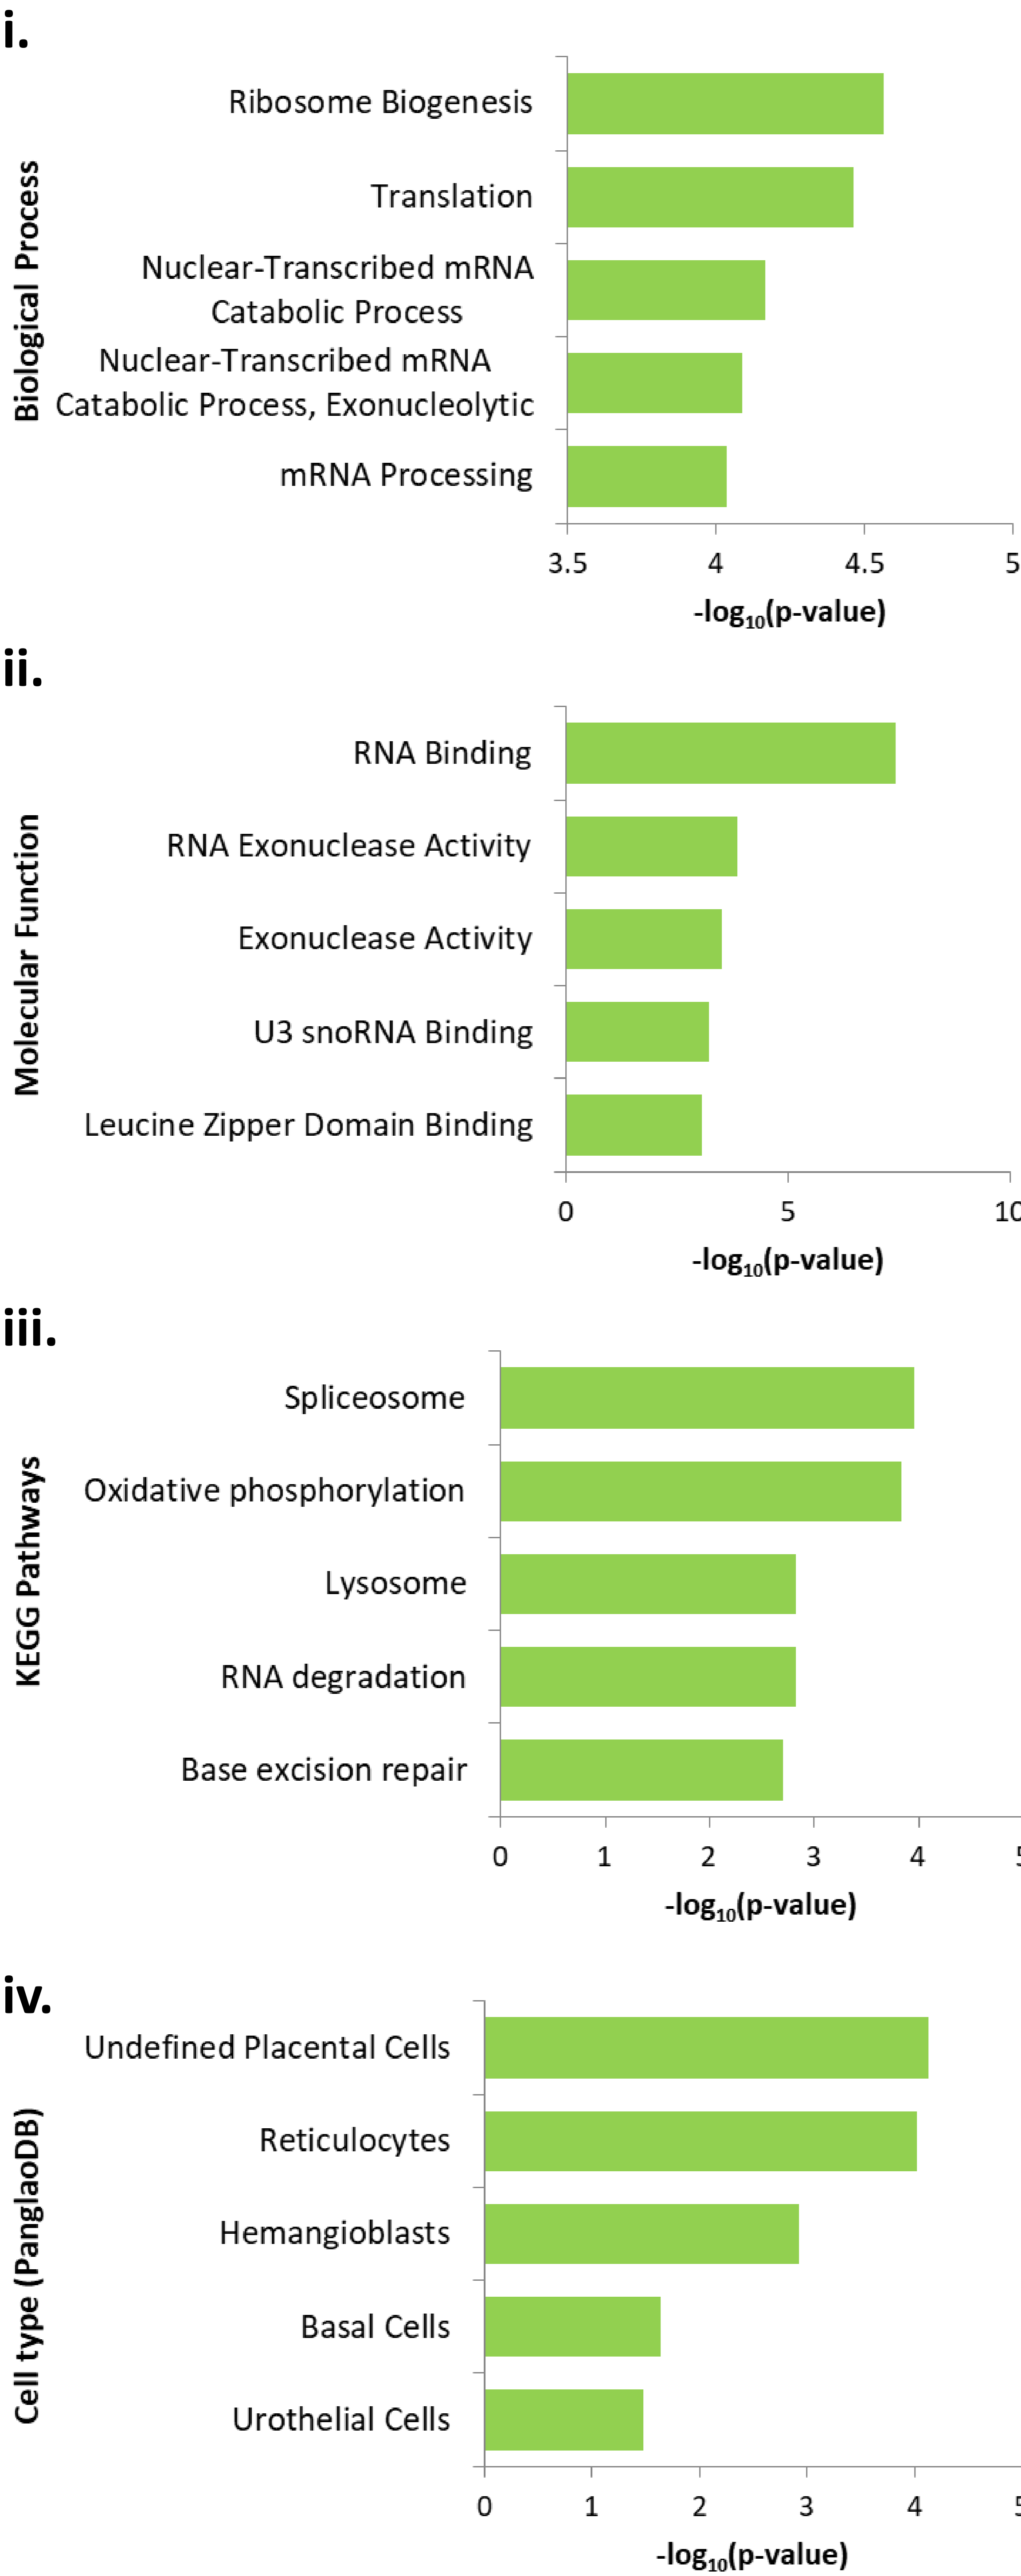**F**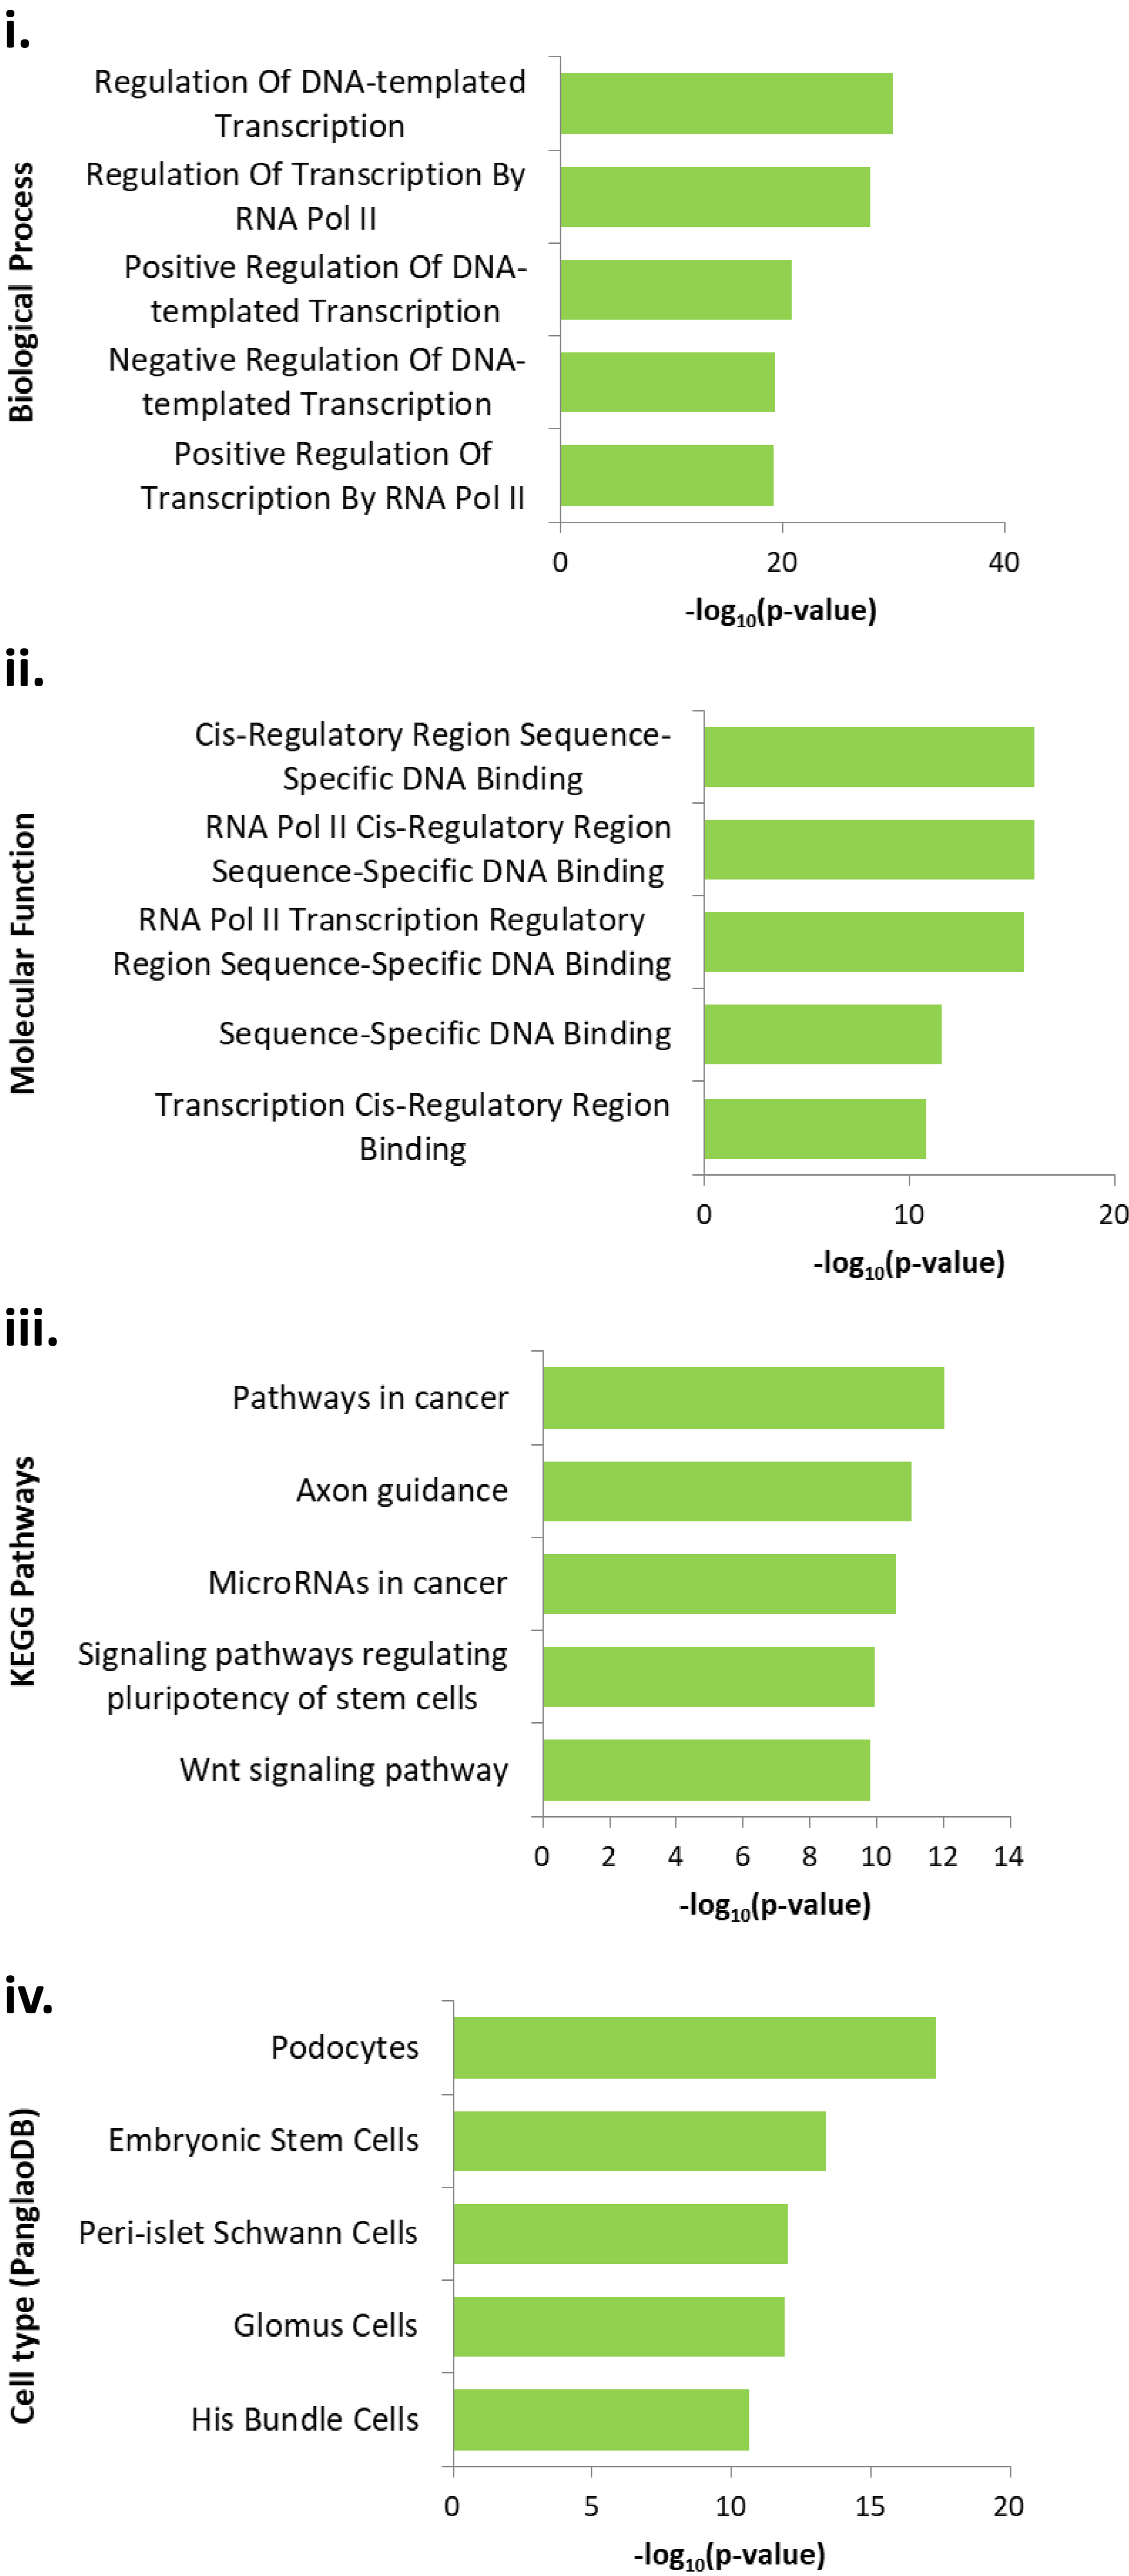**G**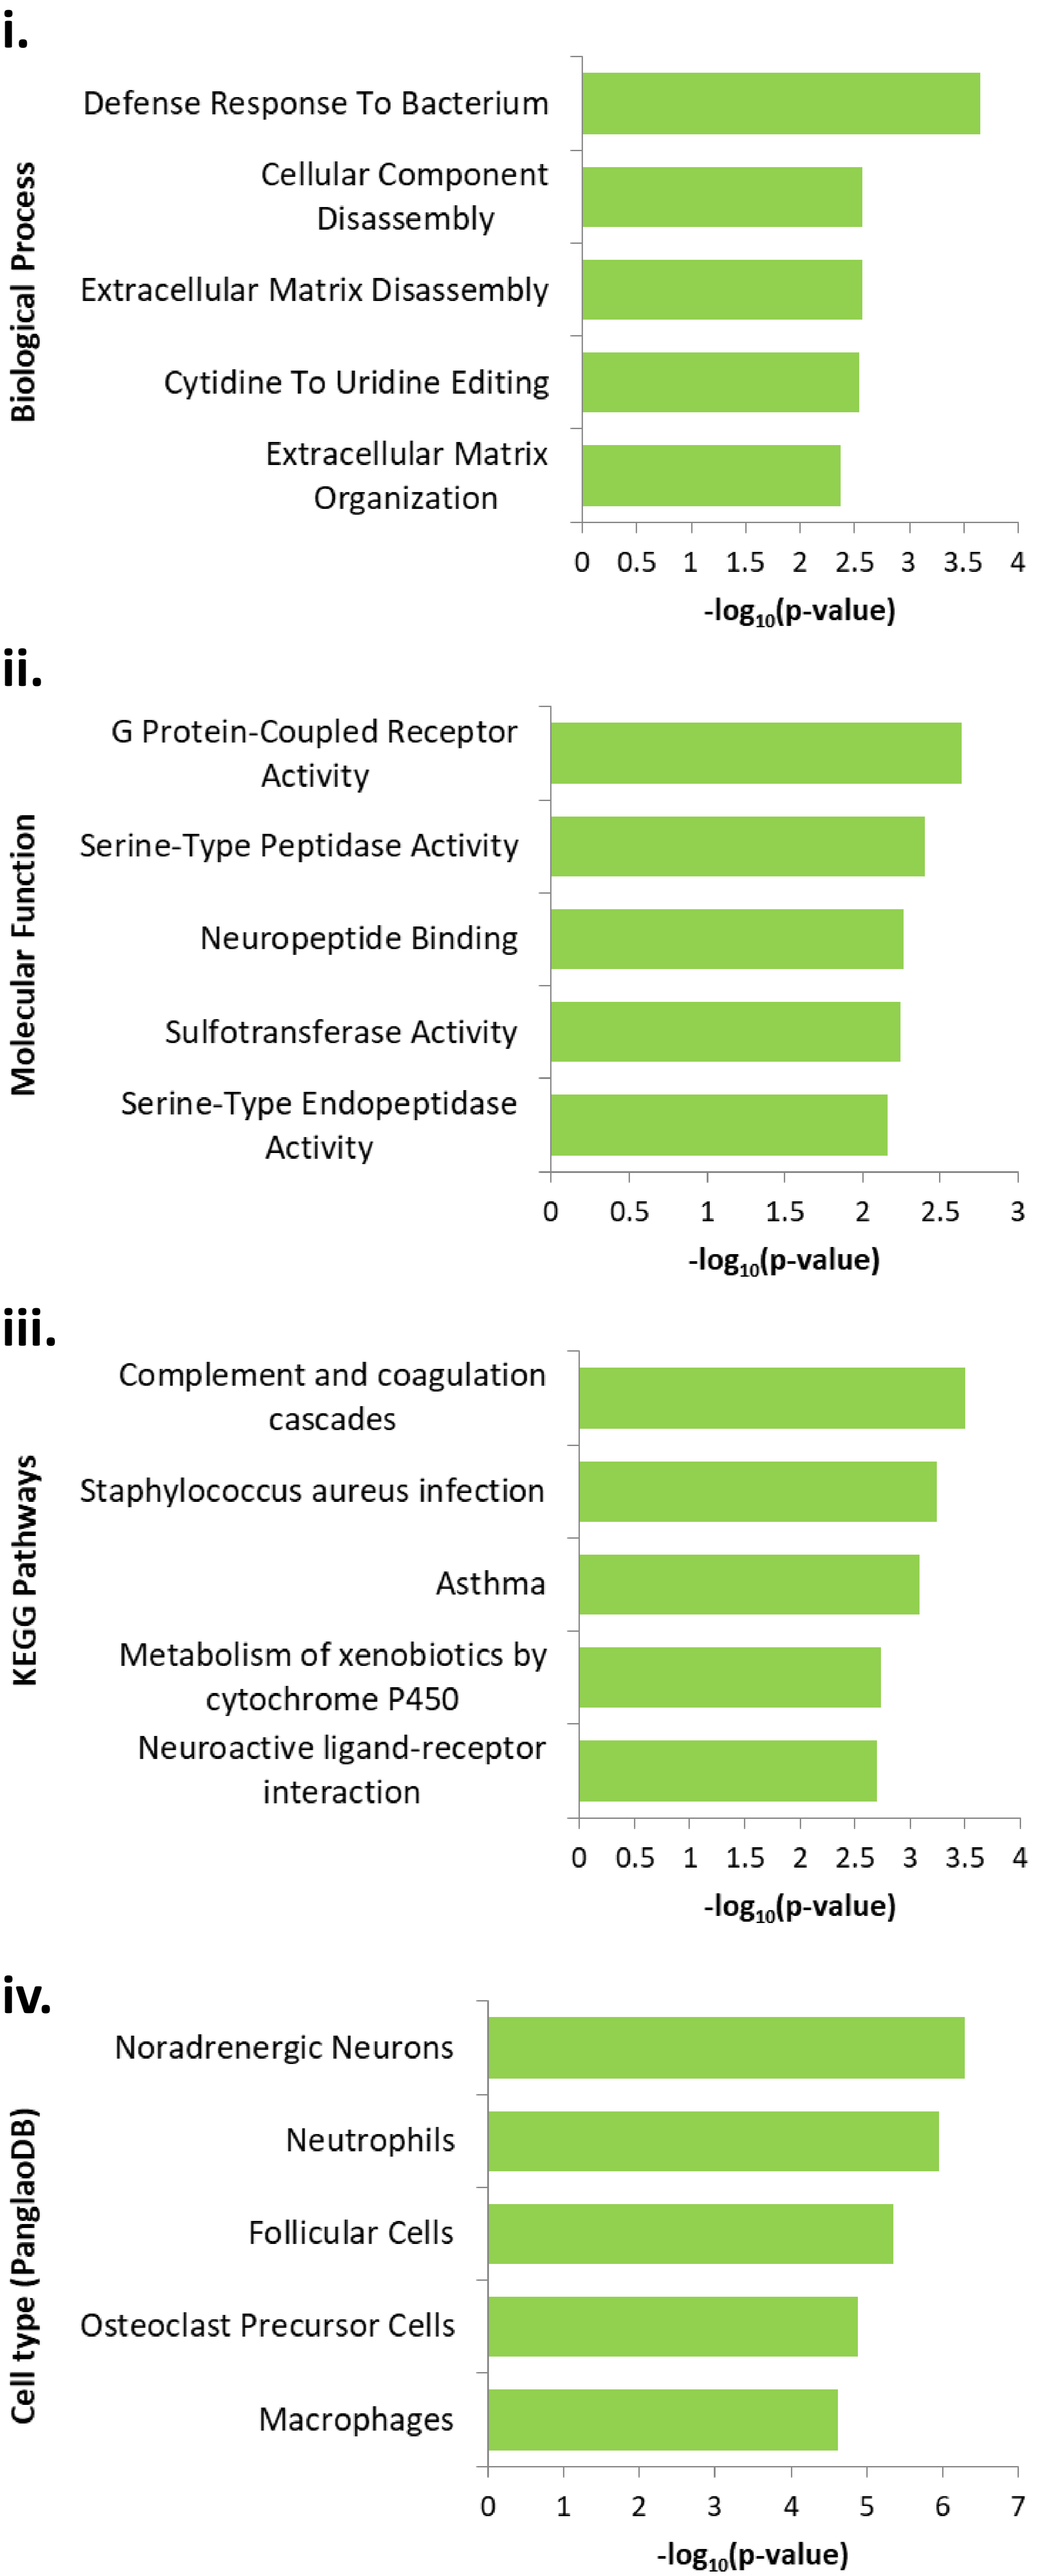

Supplement: Supplementary file 1 [file supplementary]

**A**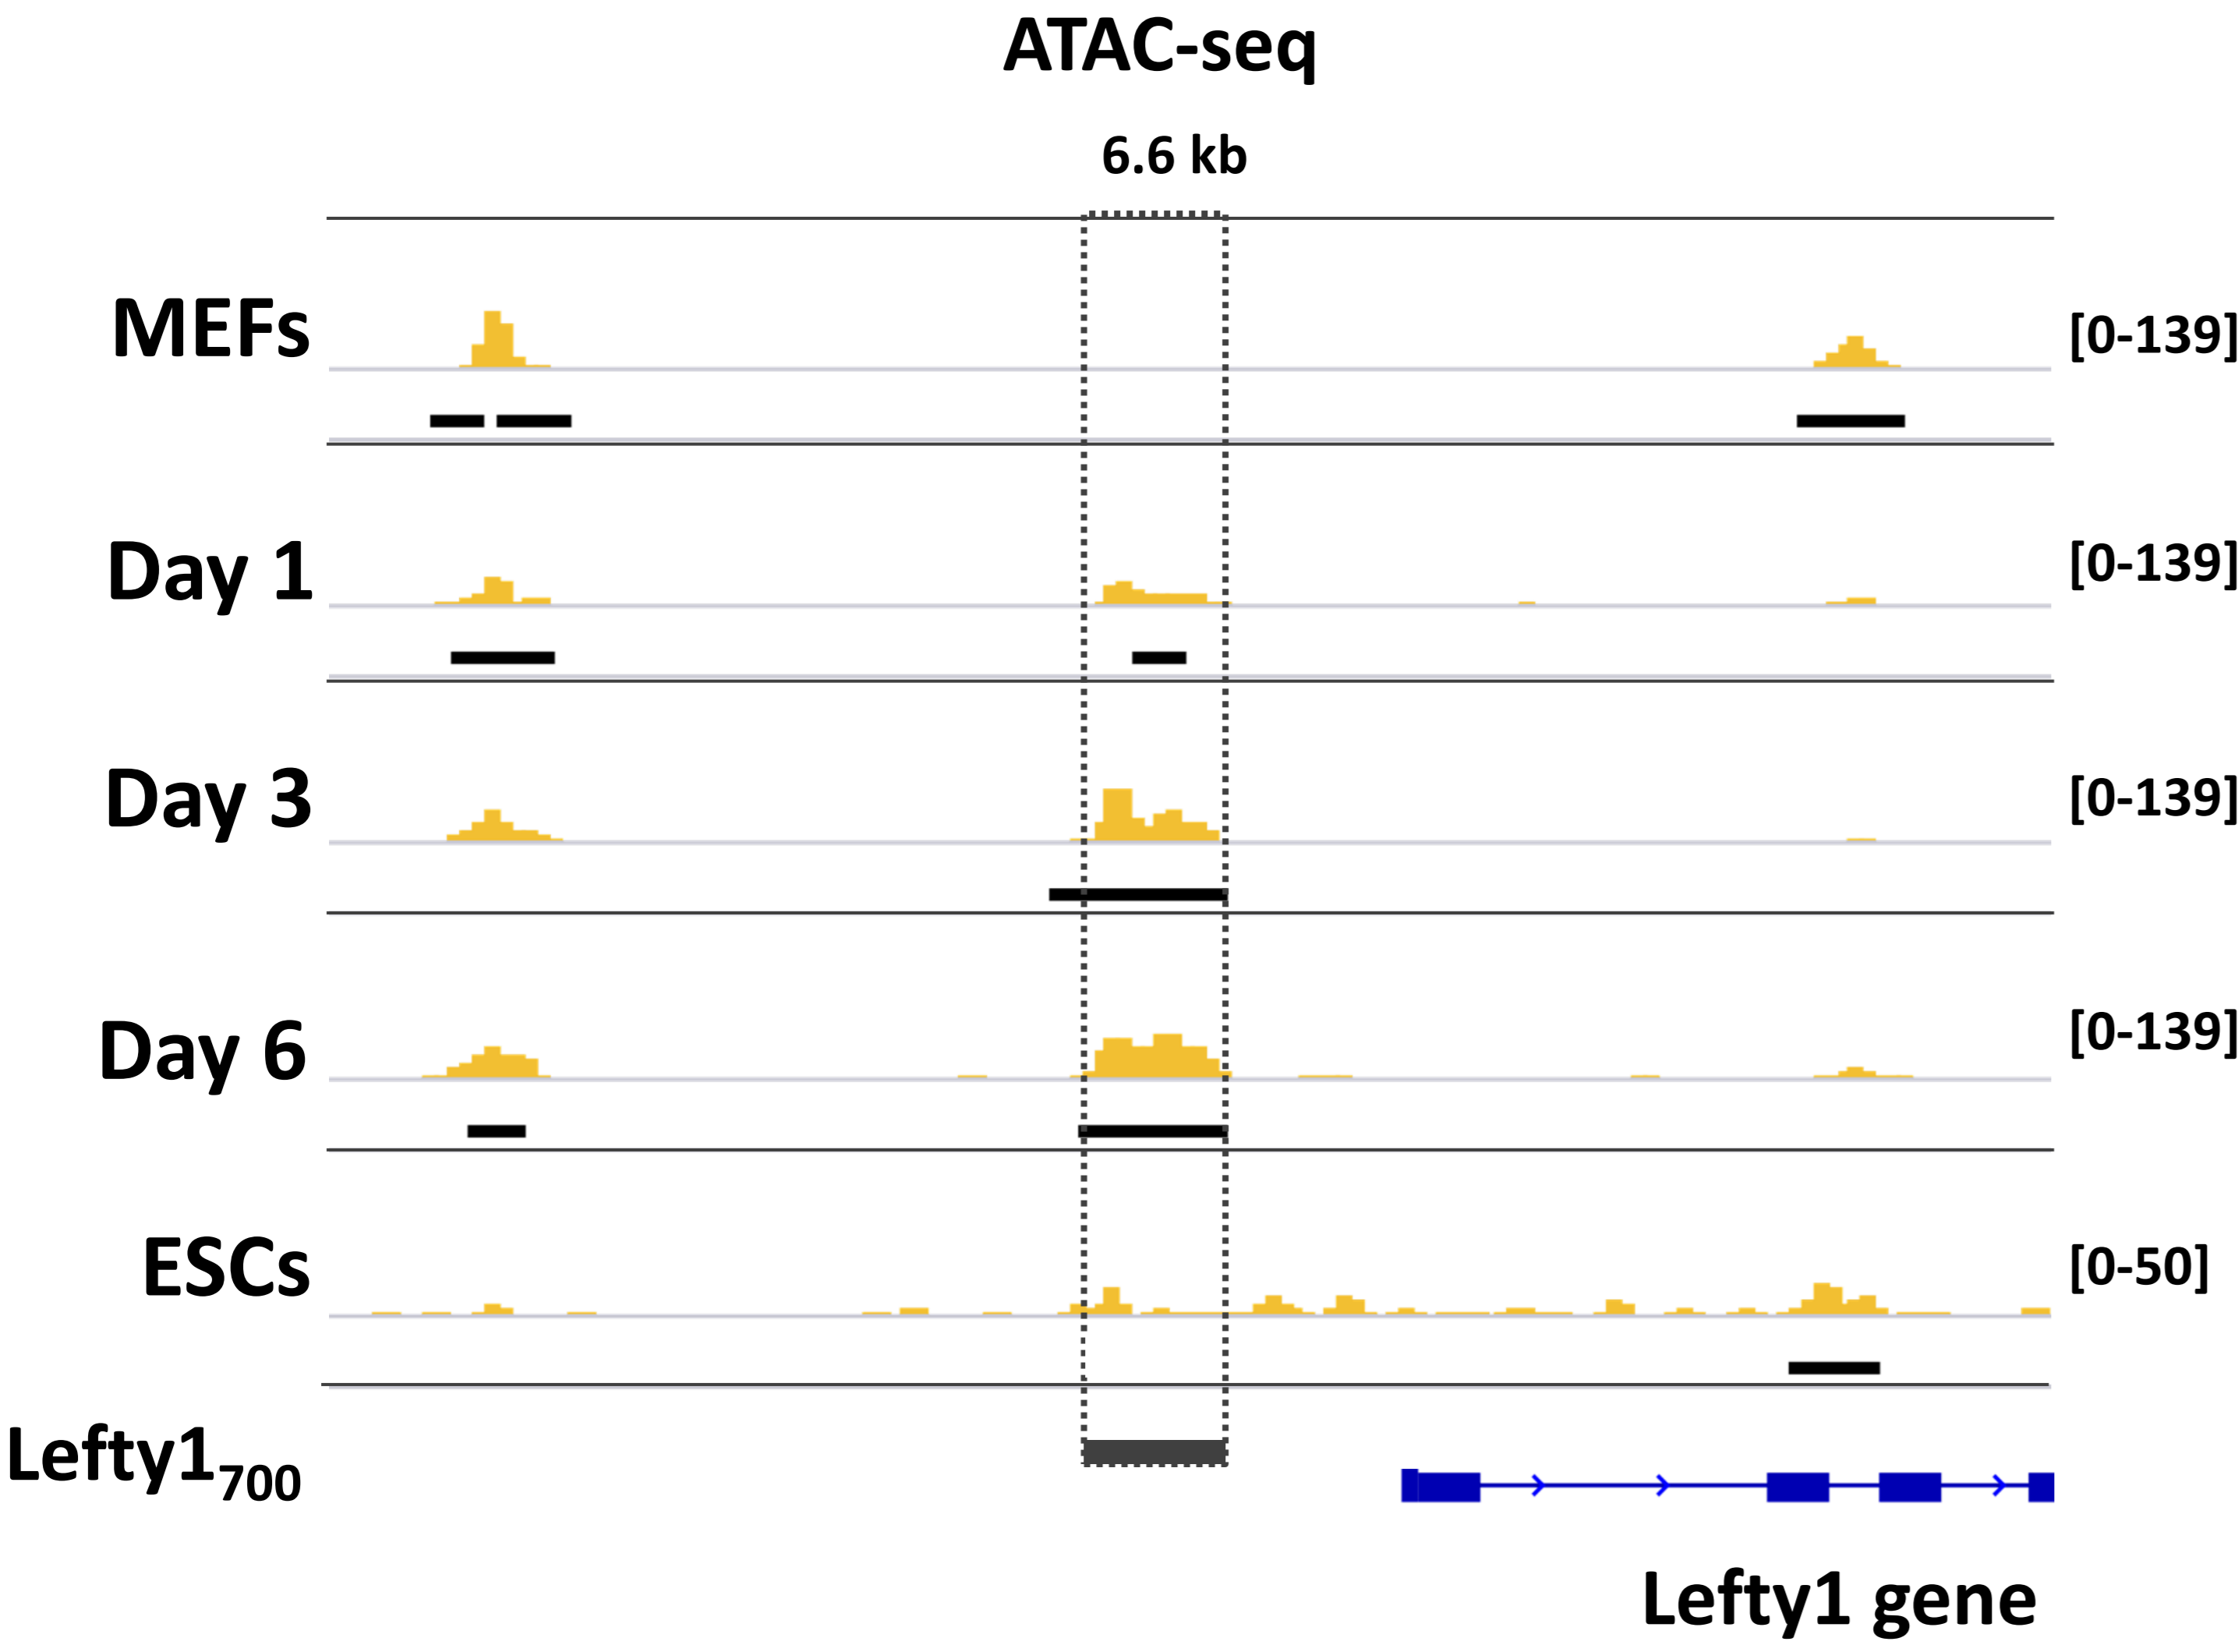**B**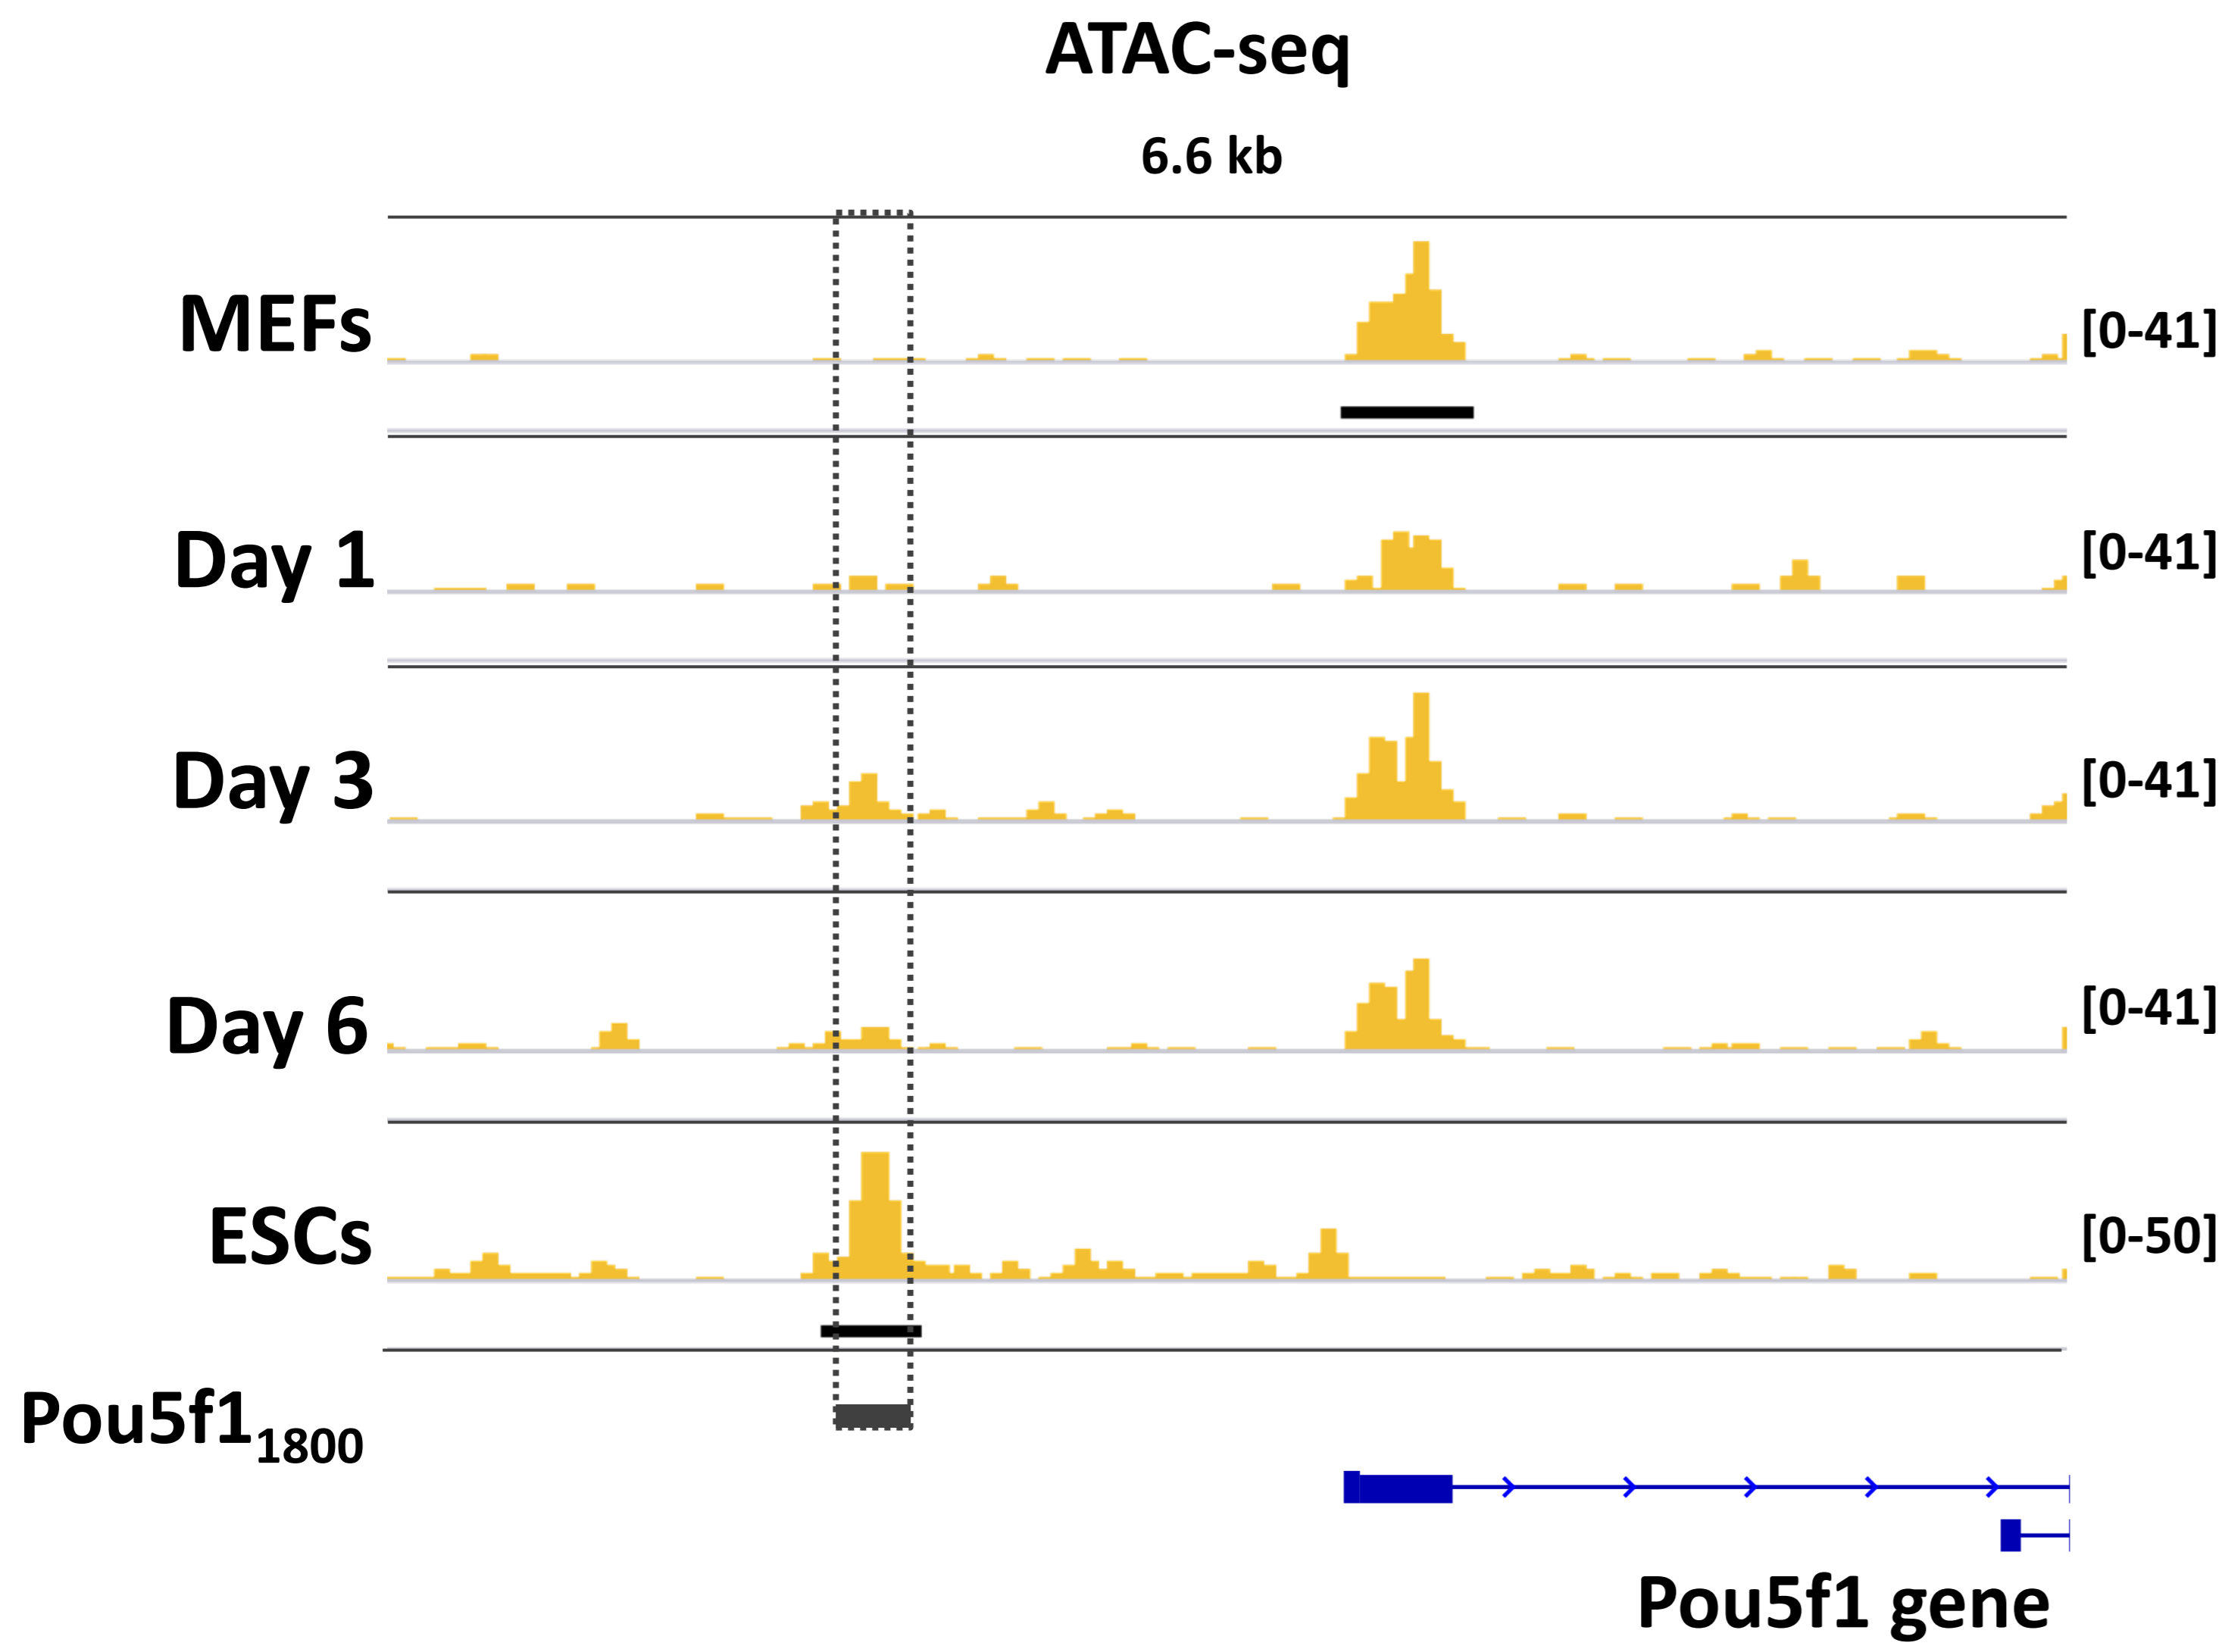**C**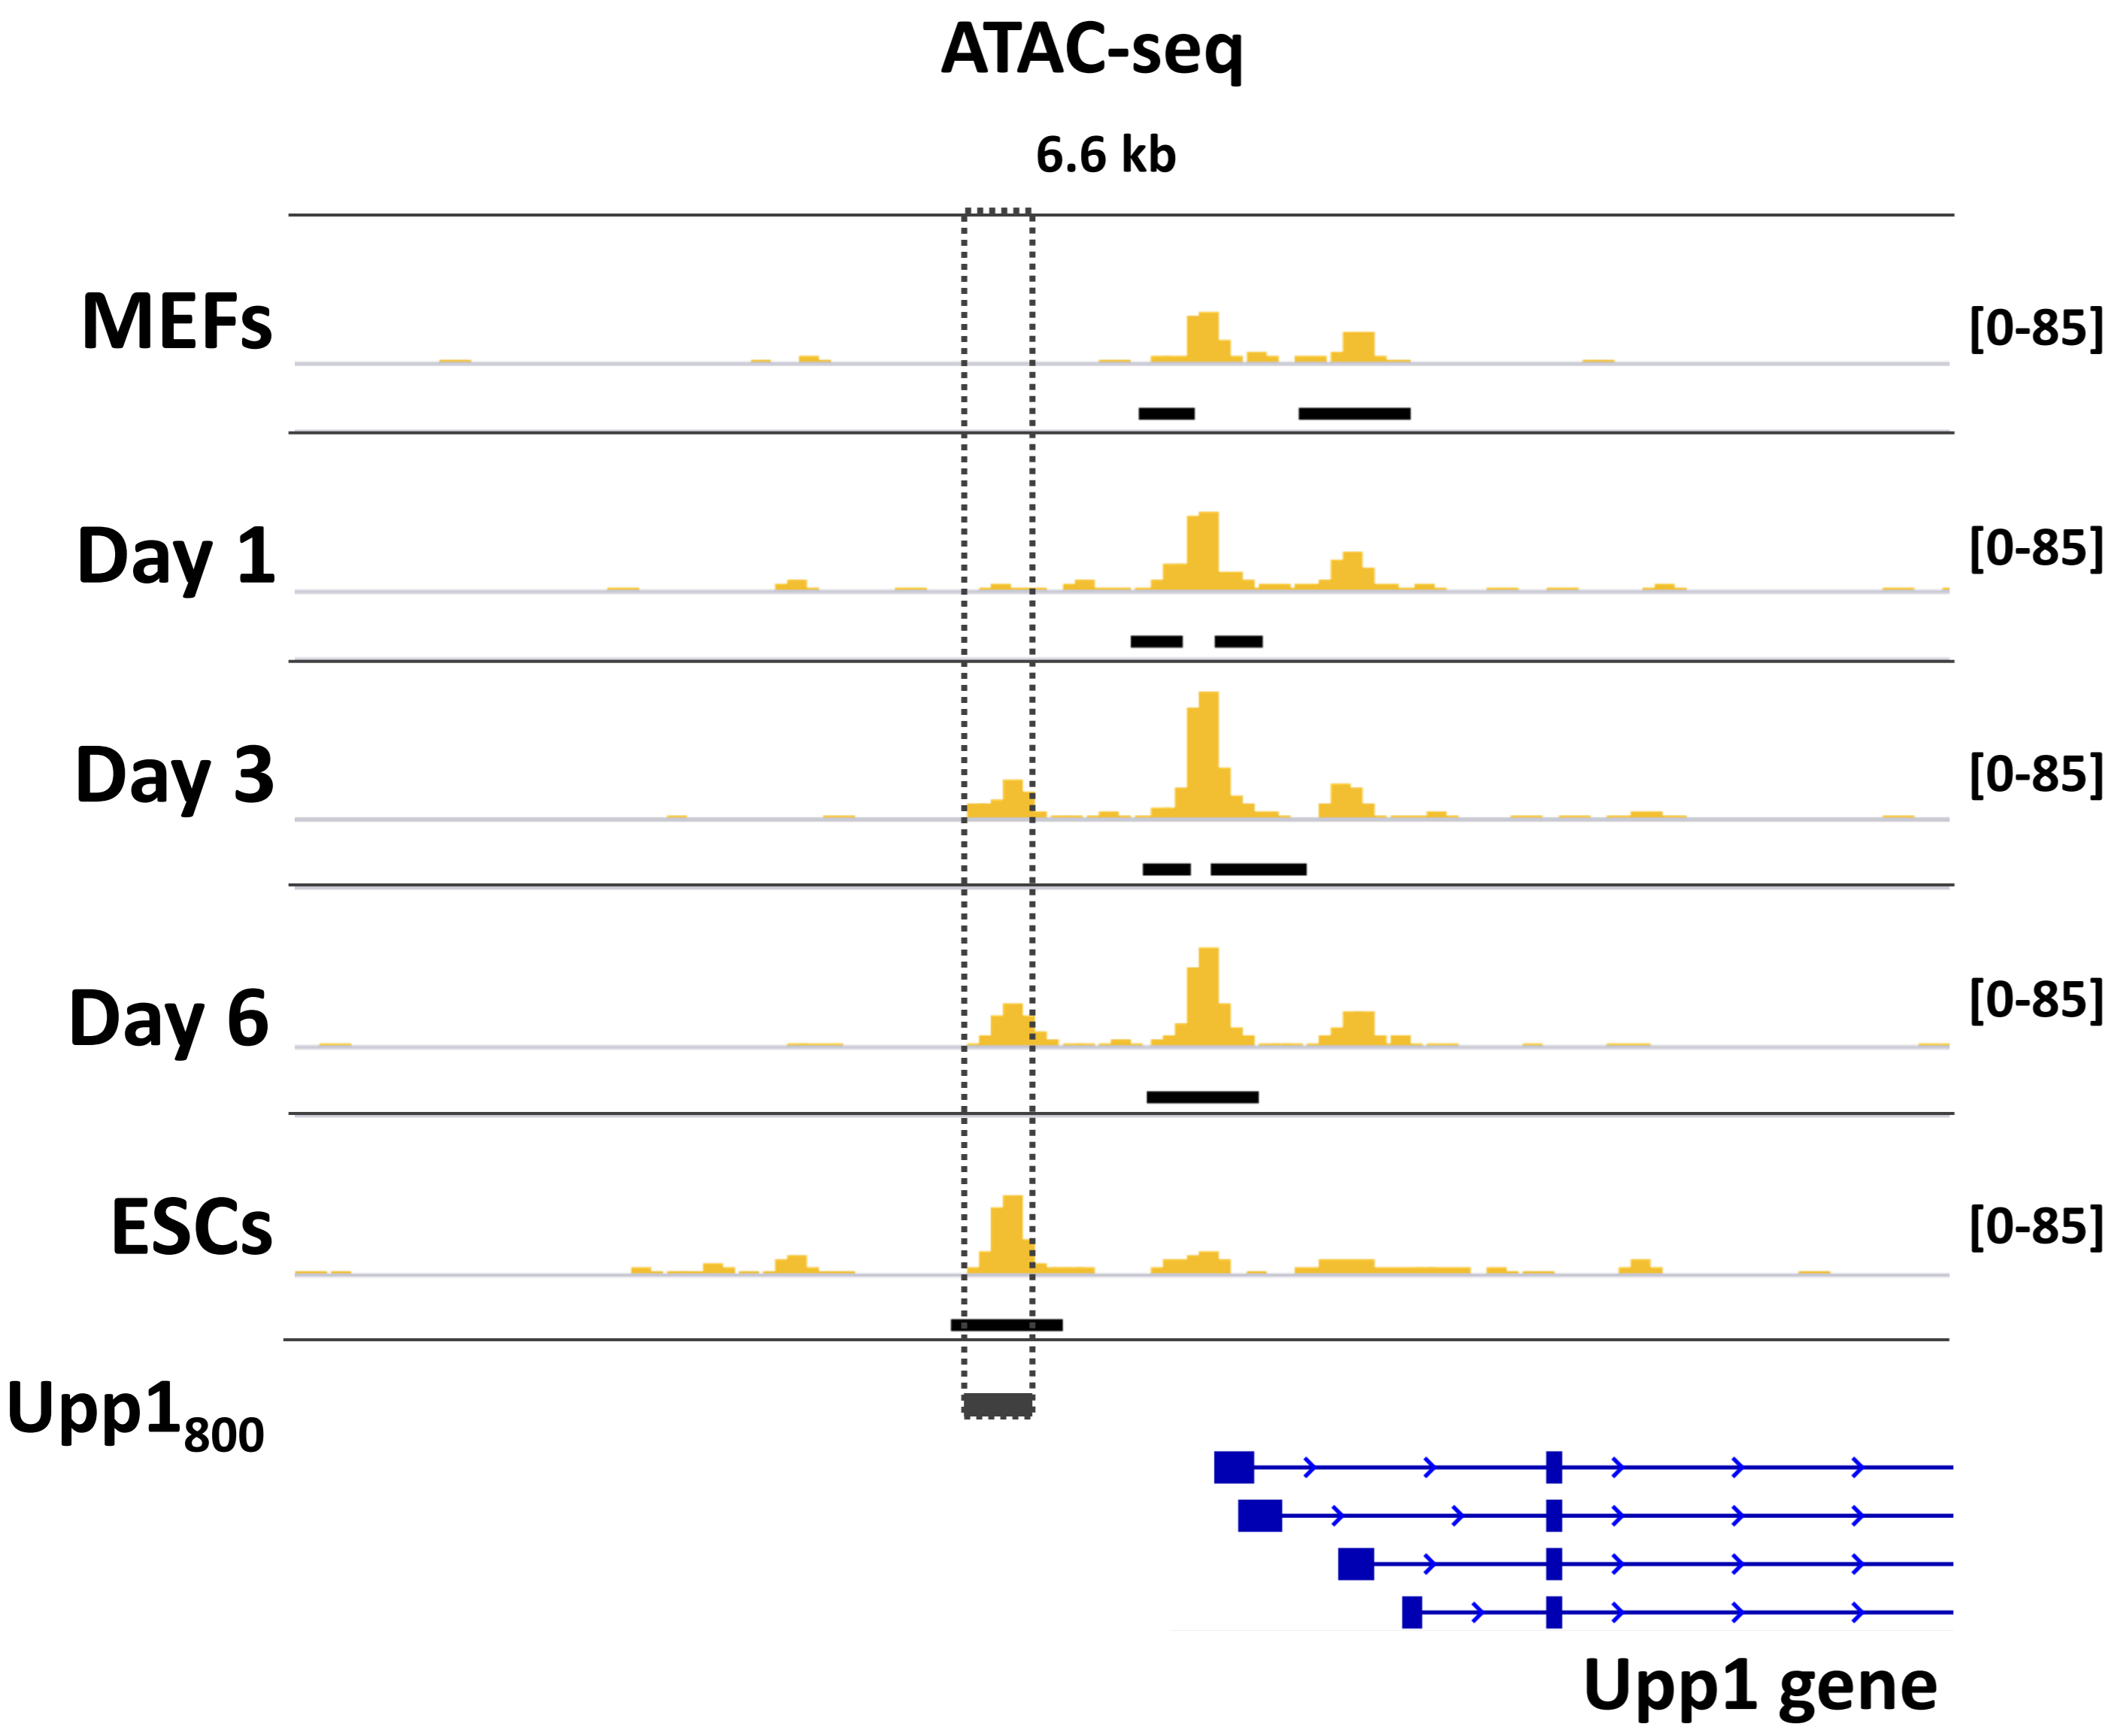**D**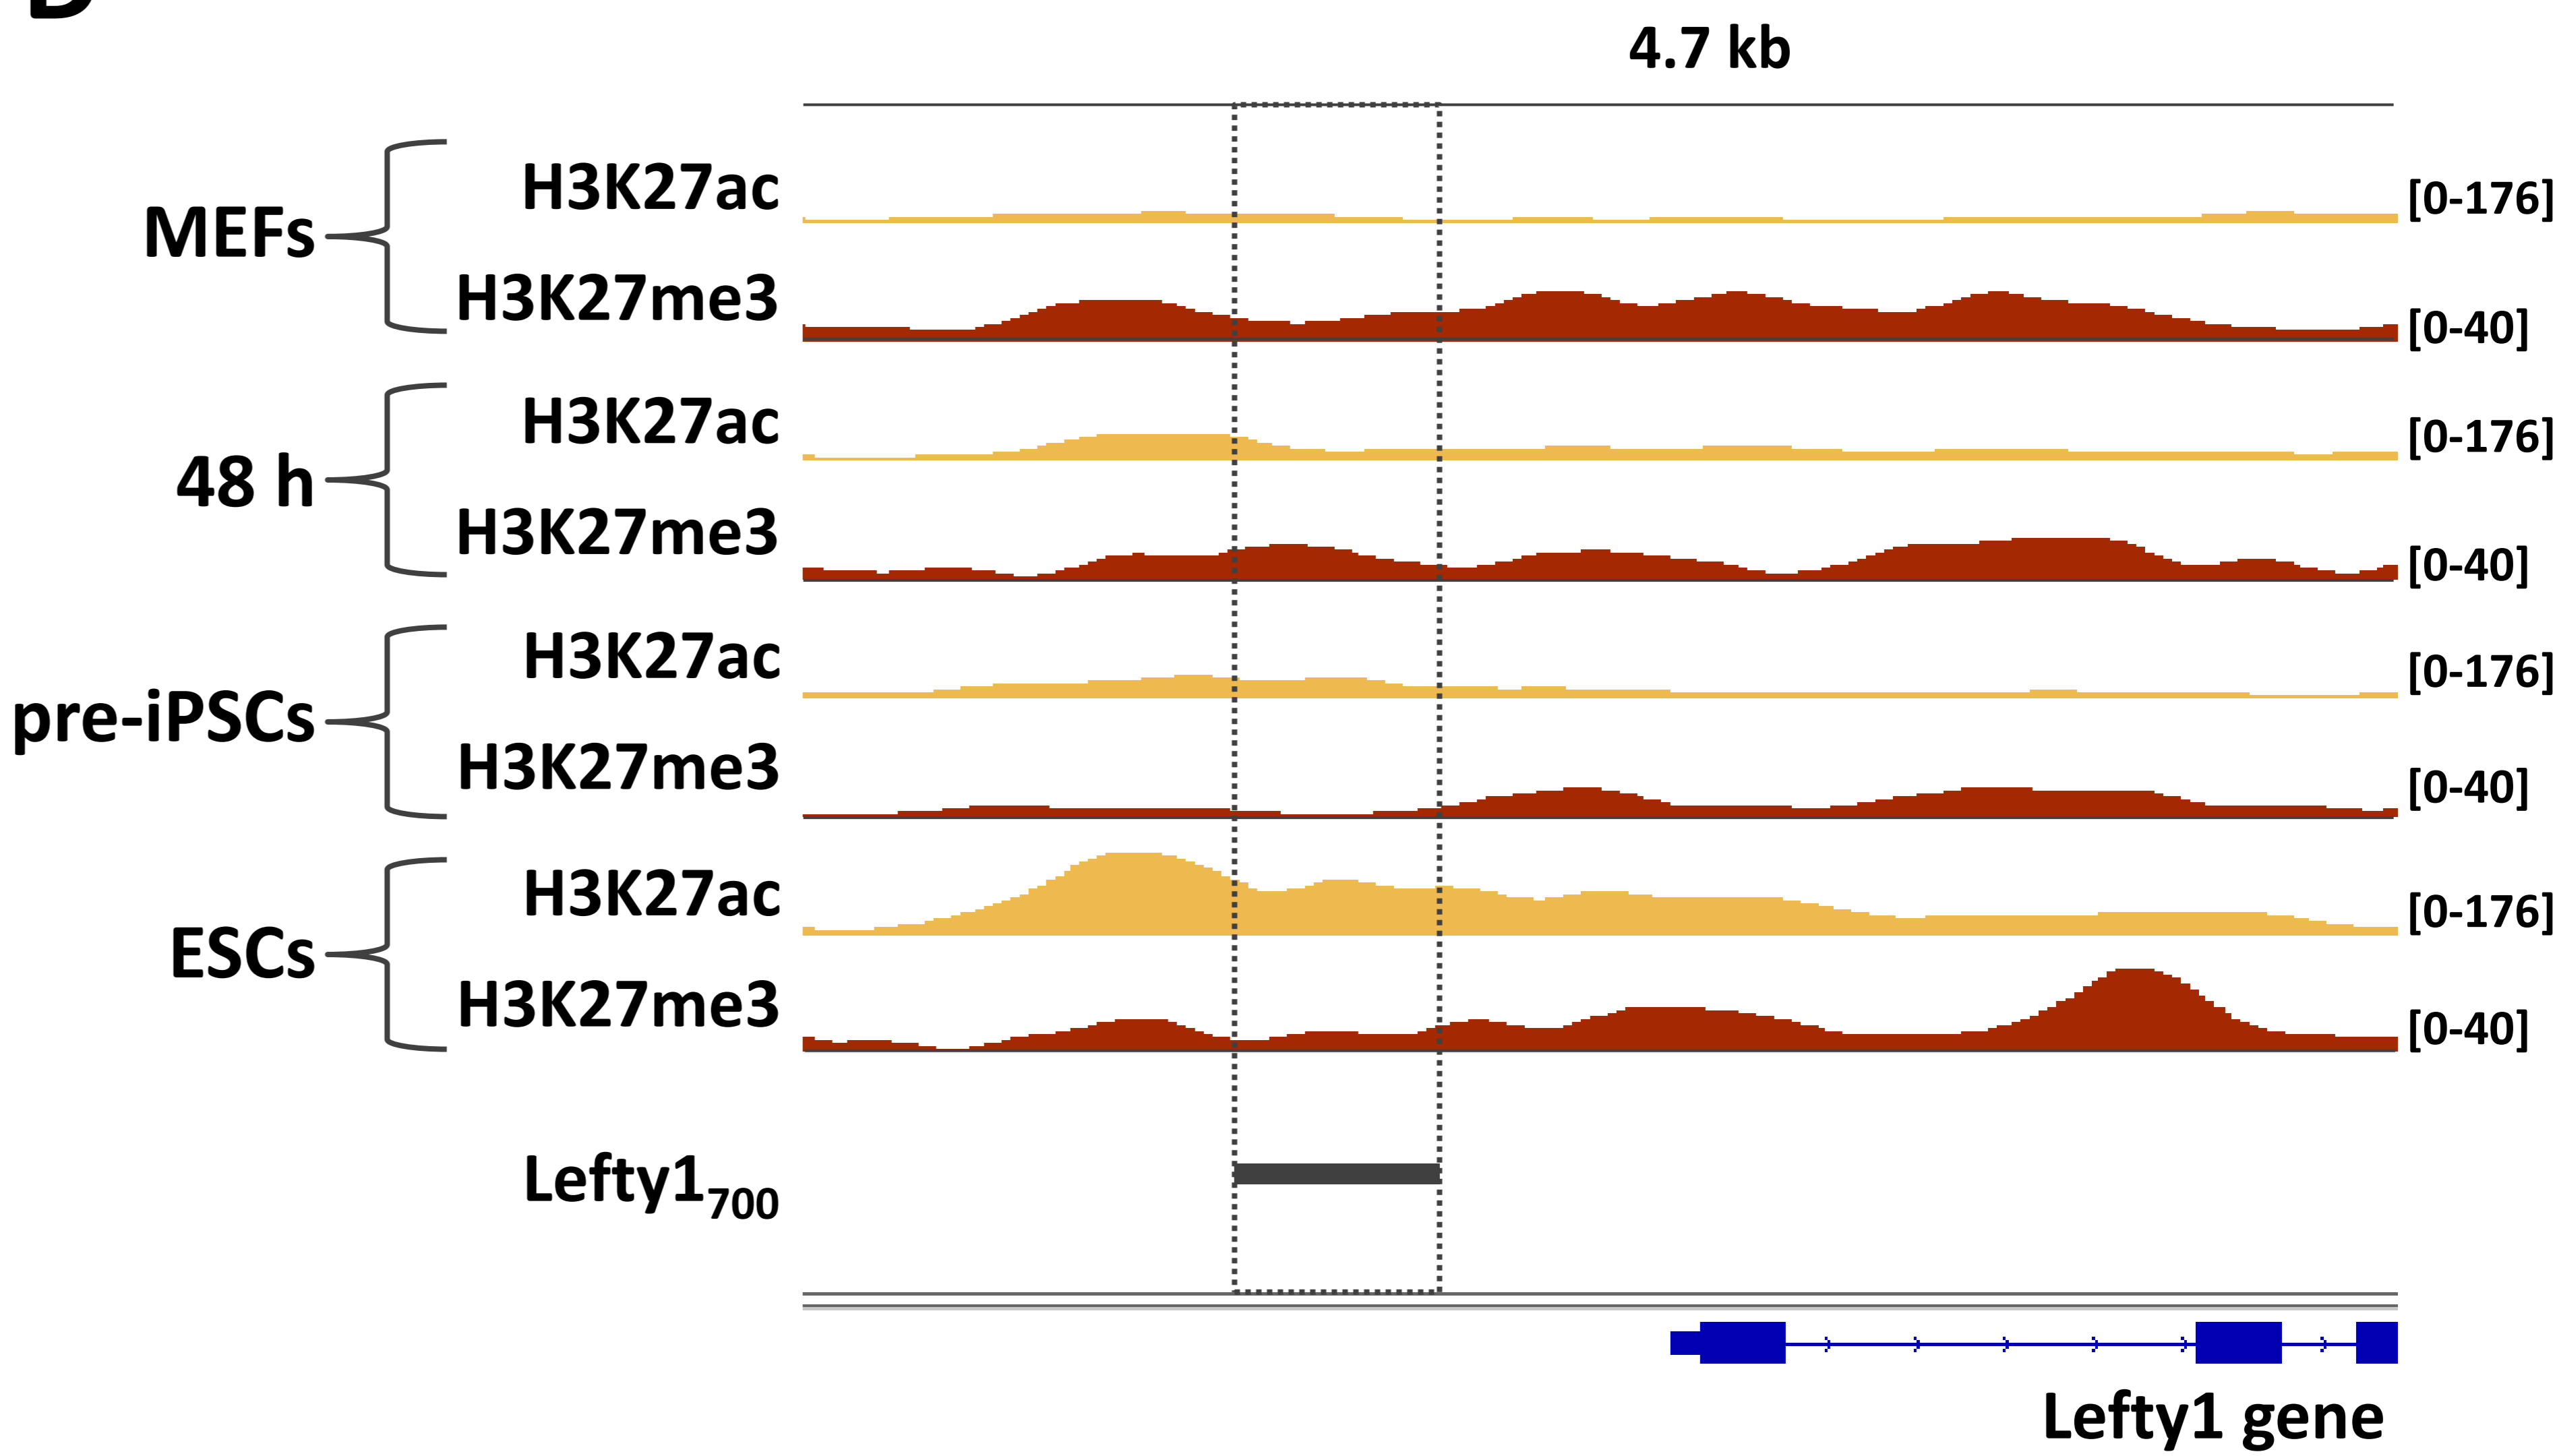**E**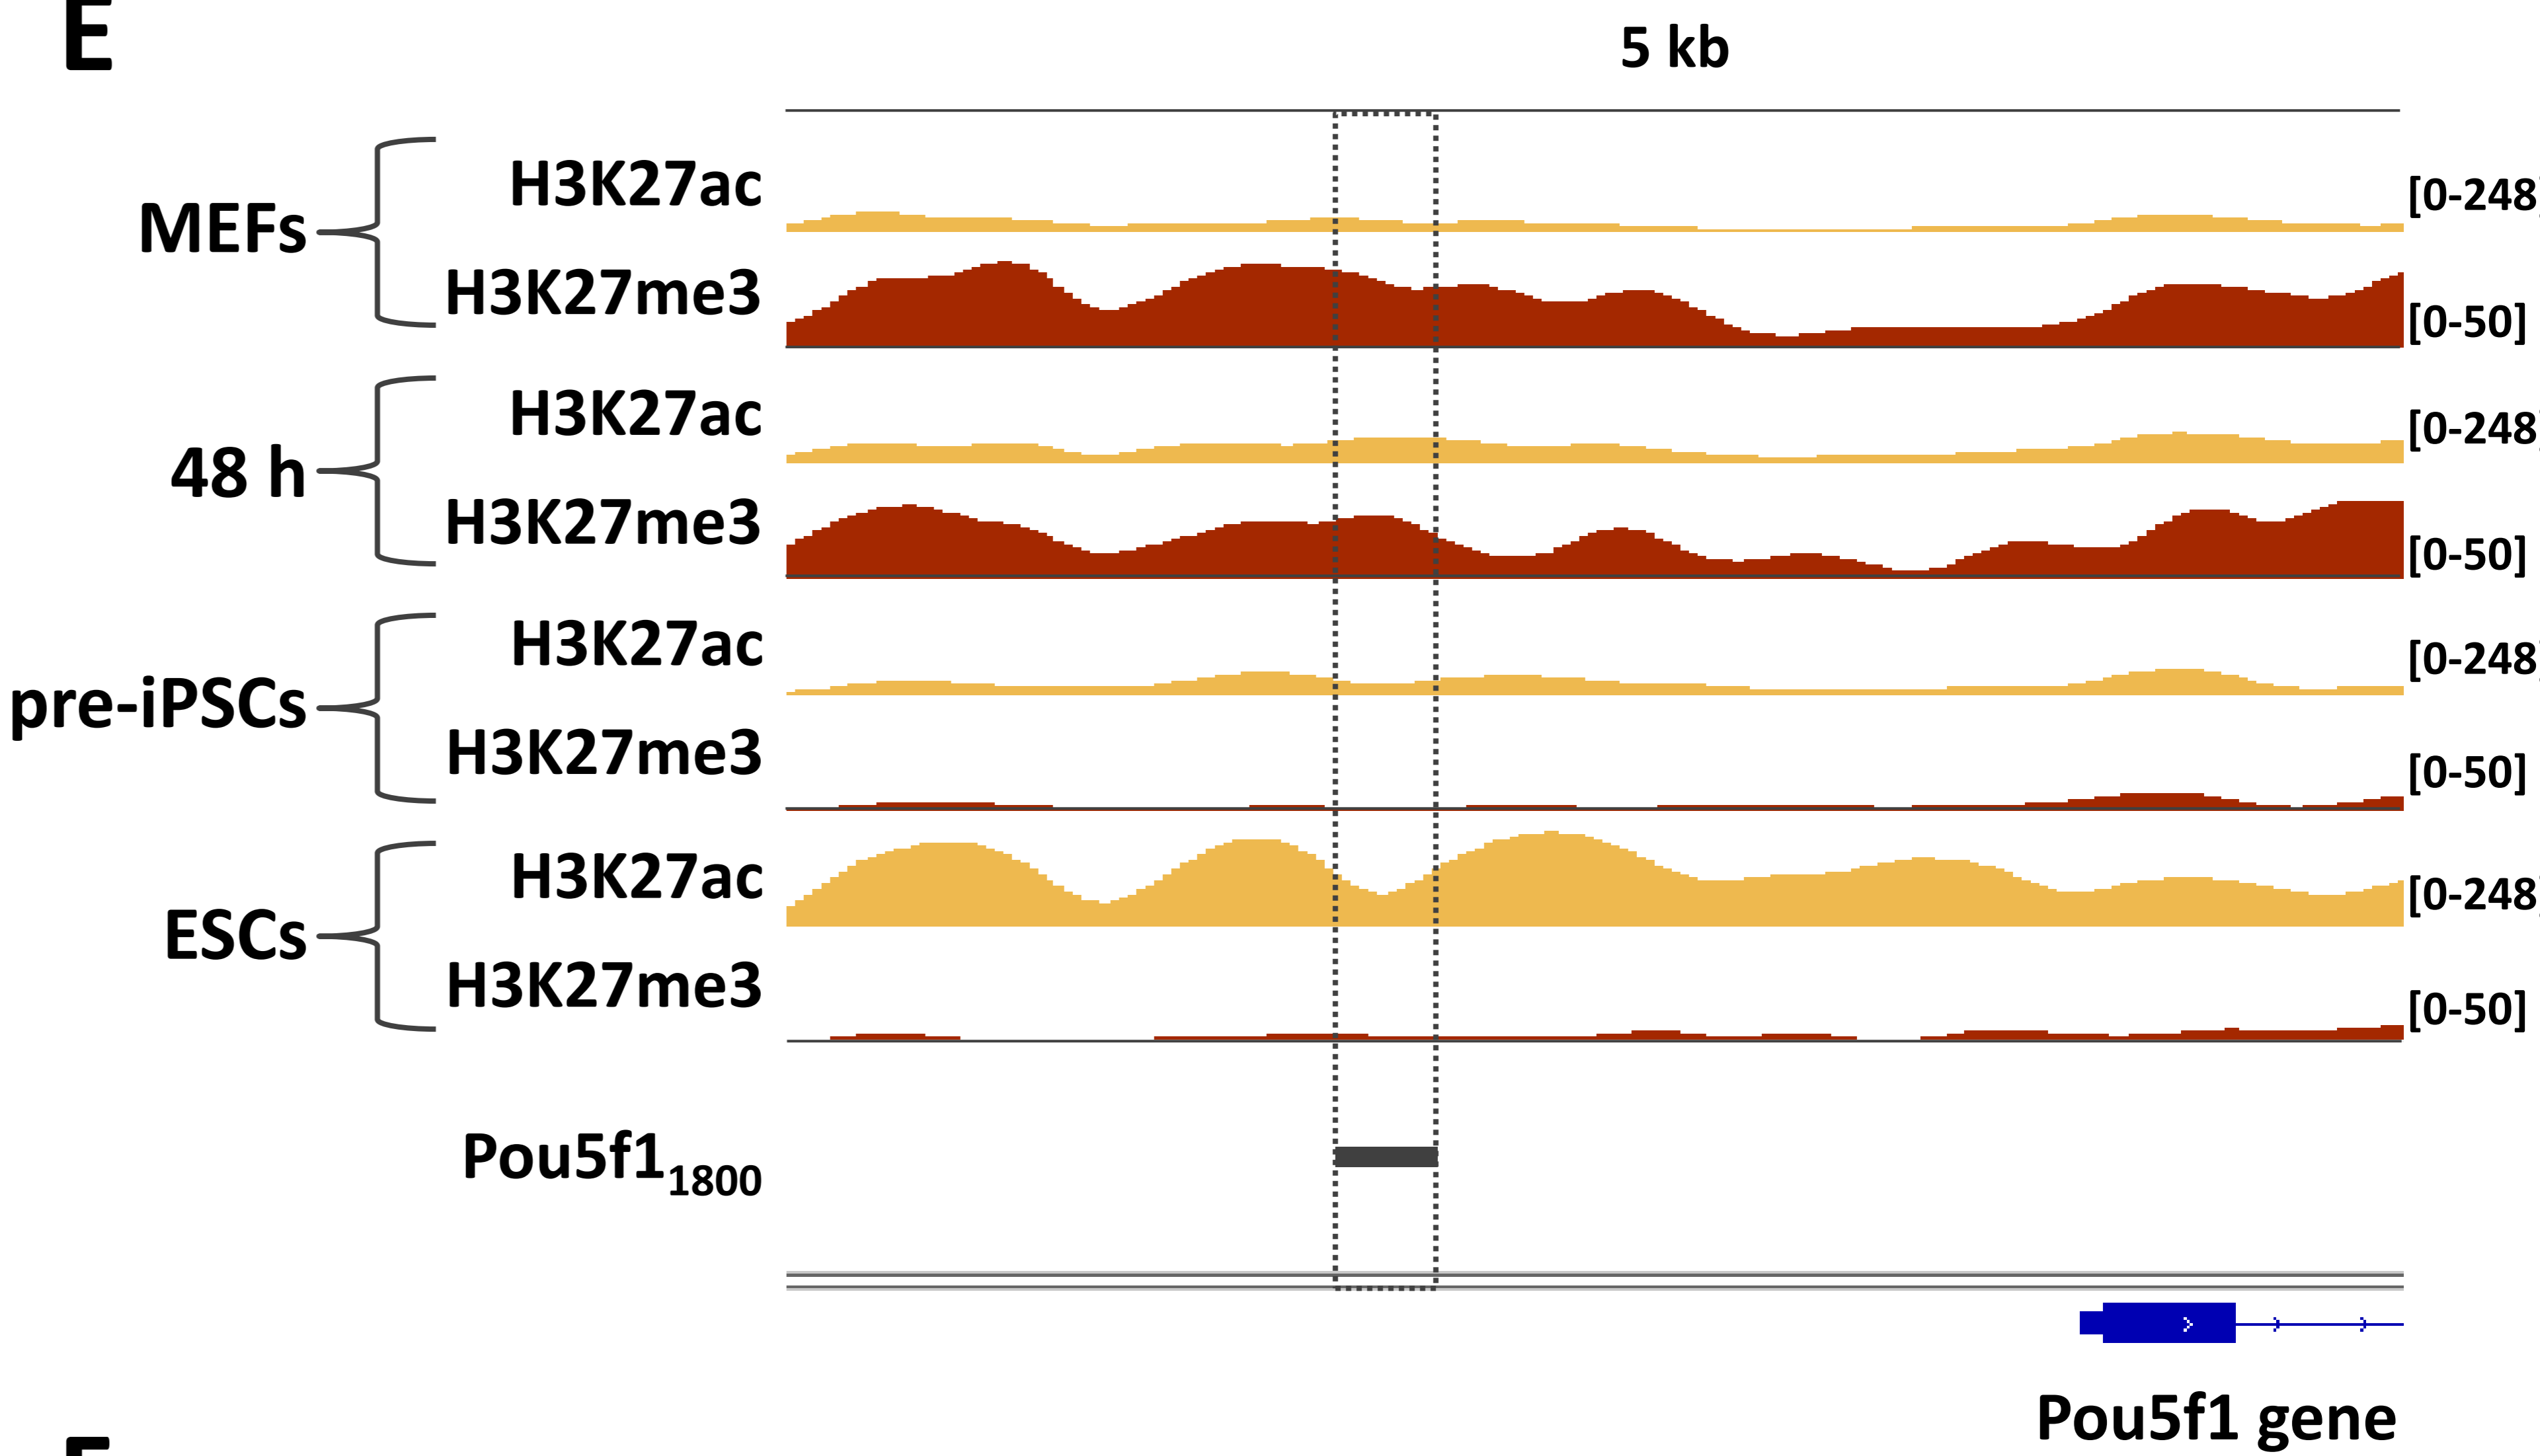**F**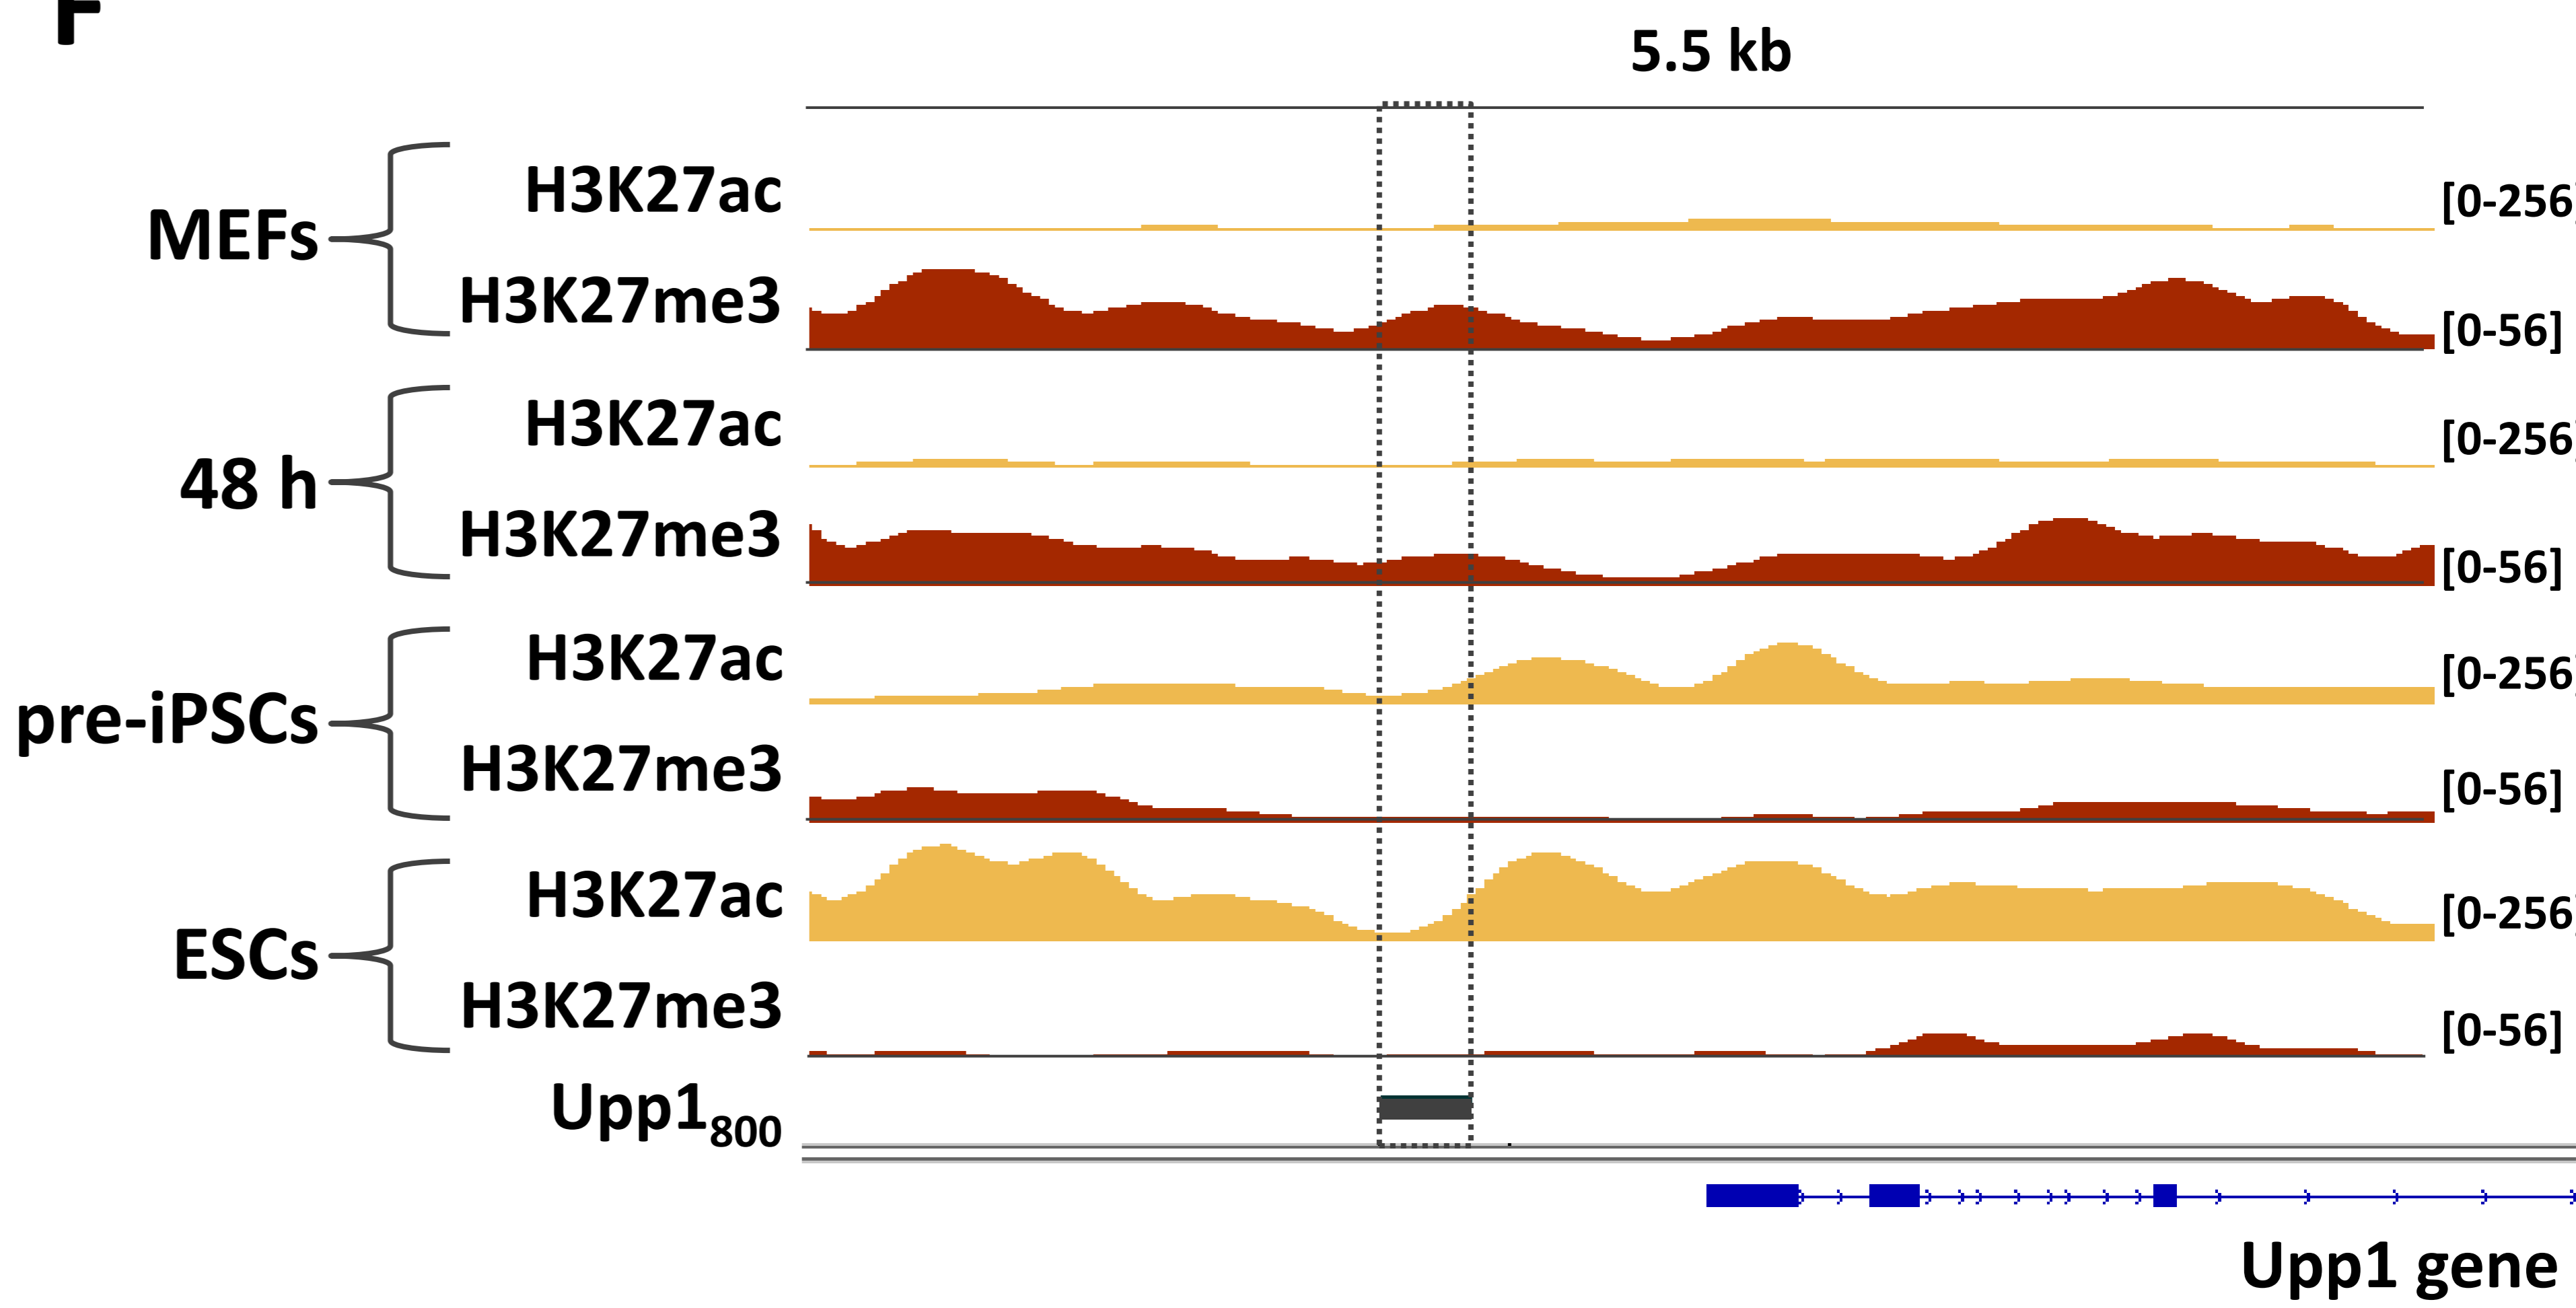

Supplement: Supplementary file 2 [file supplementary]

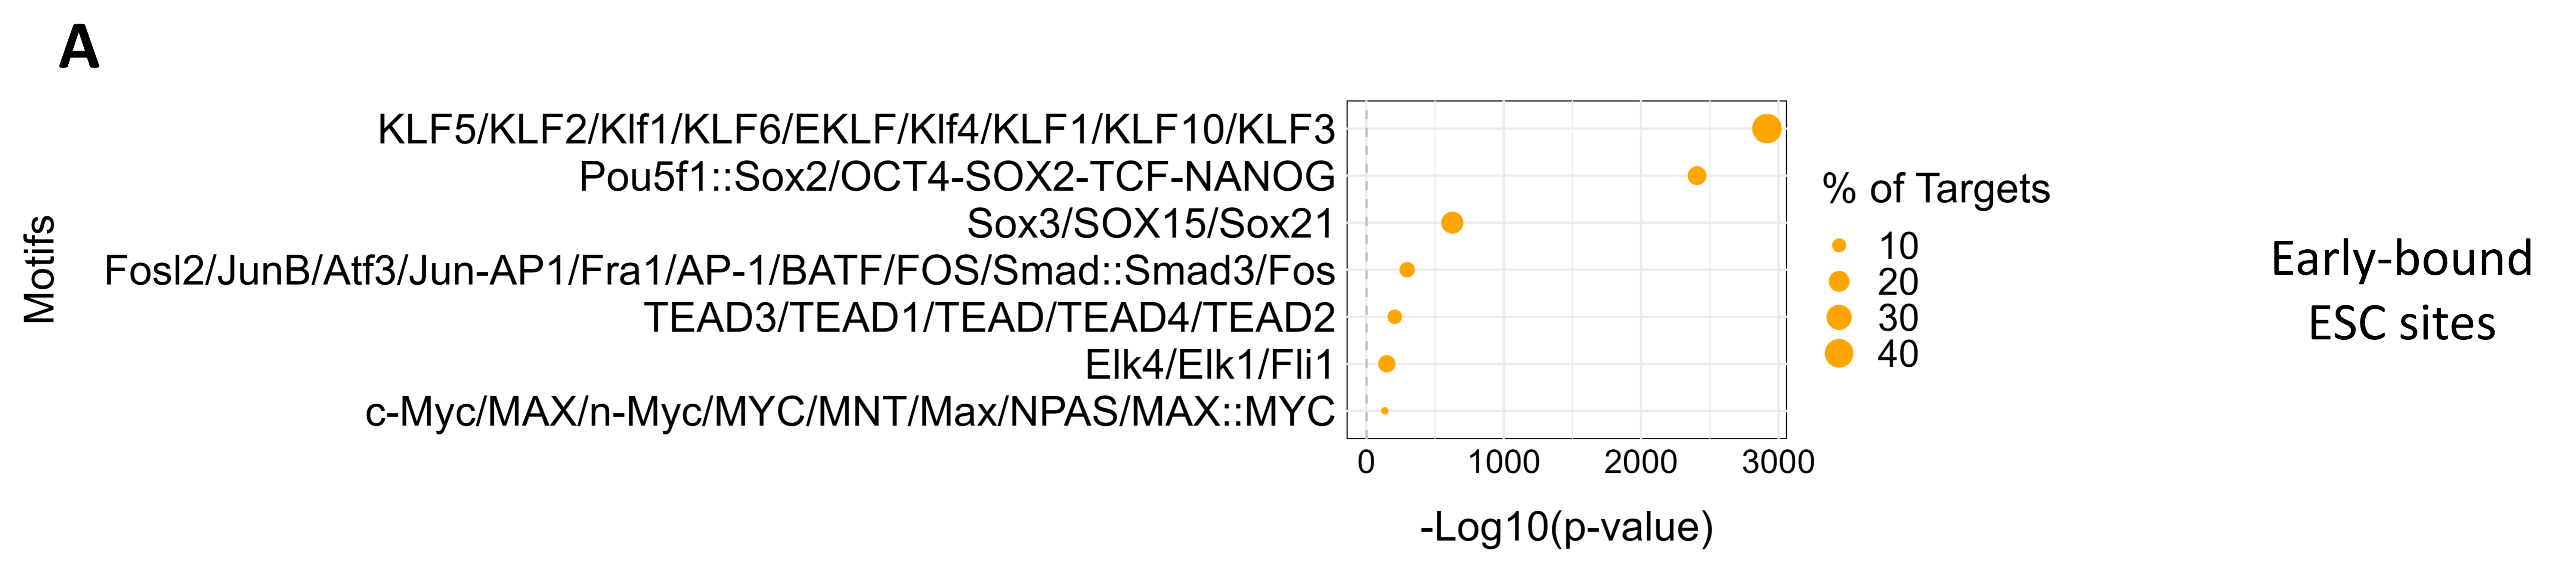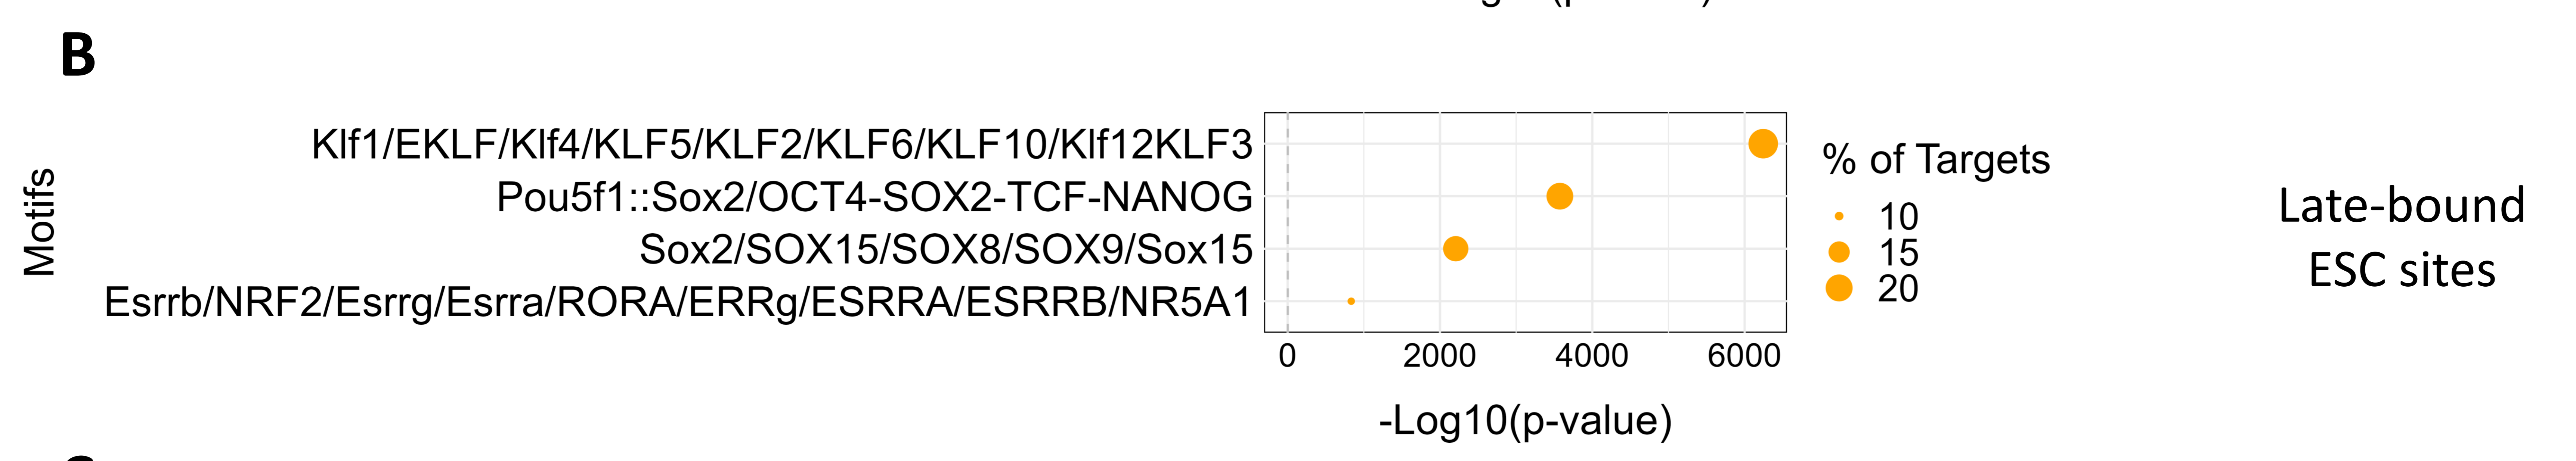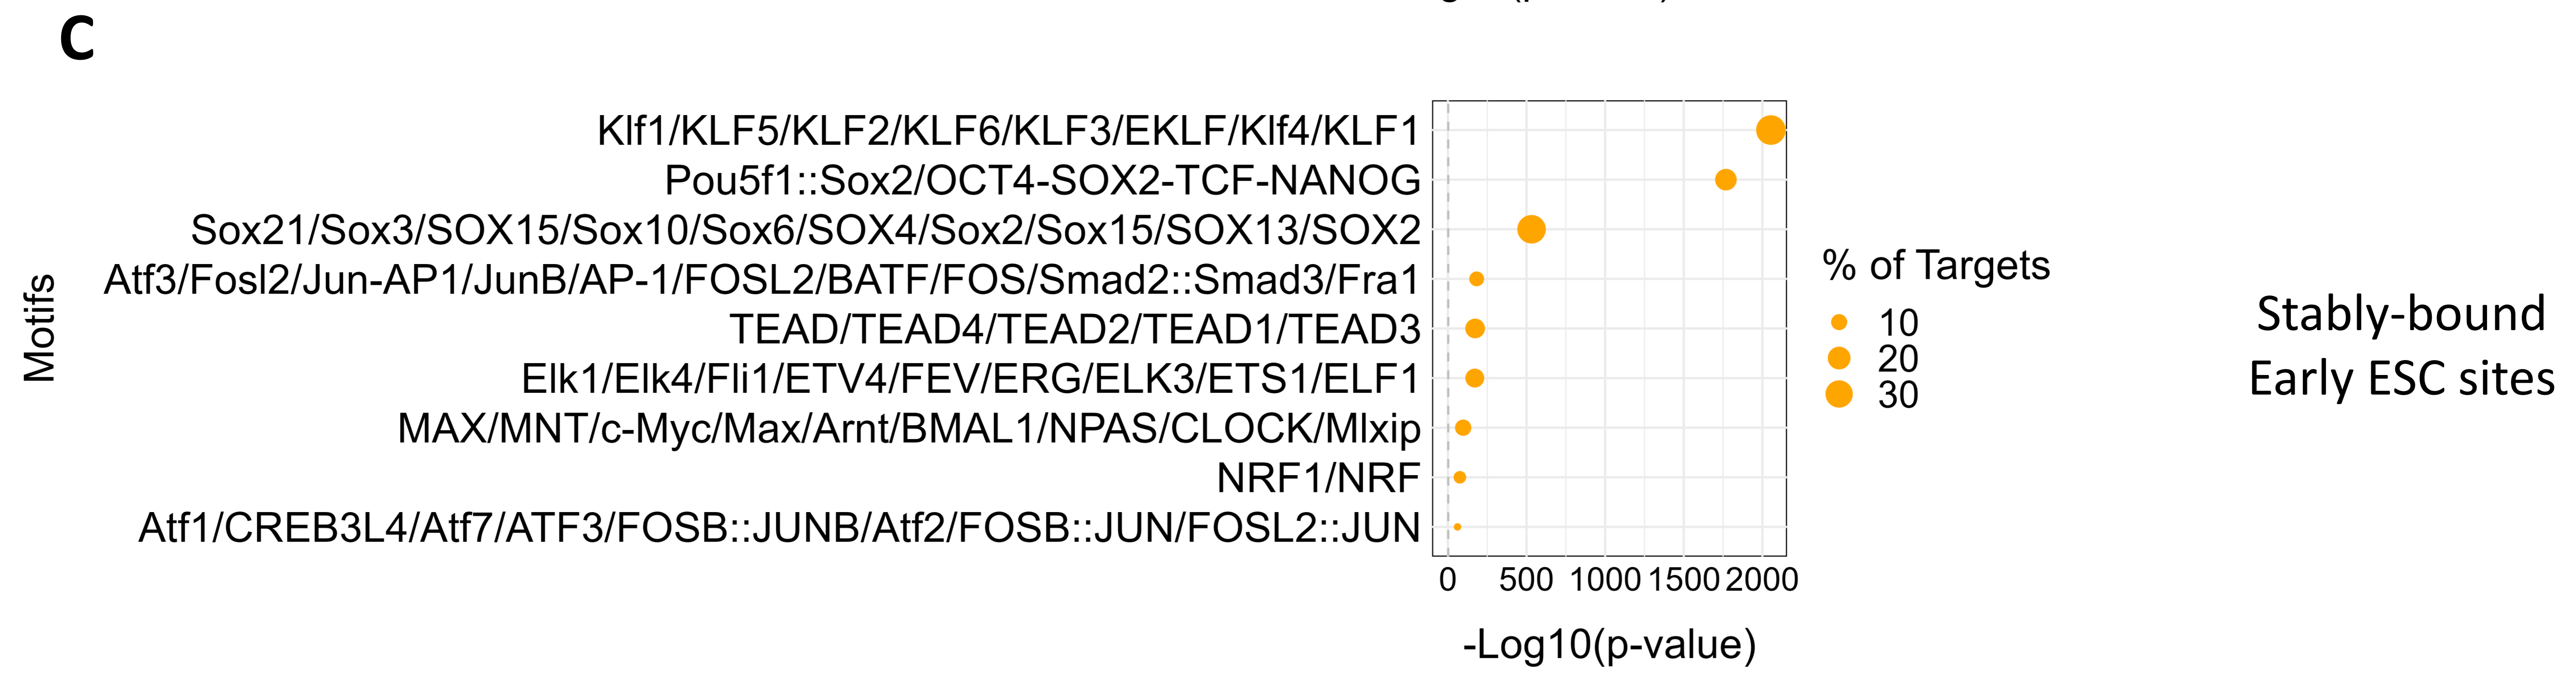

Supplement: Supplementary file 3 [file supplementary]

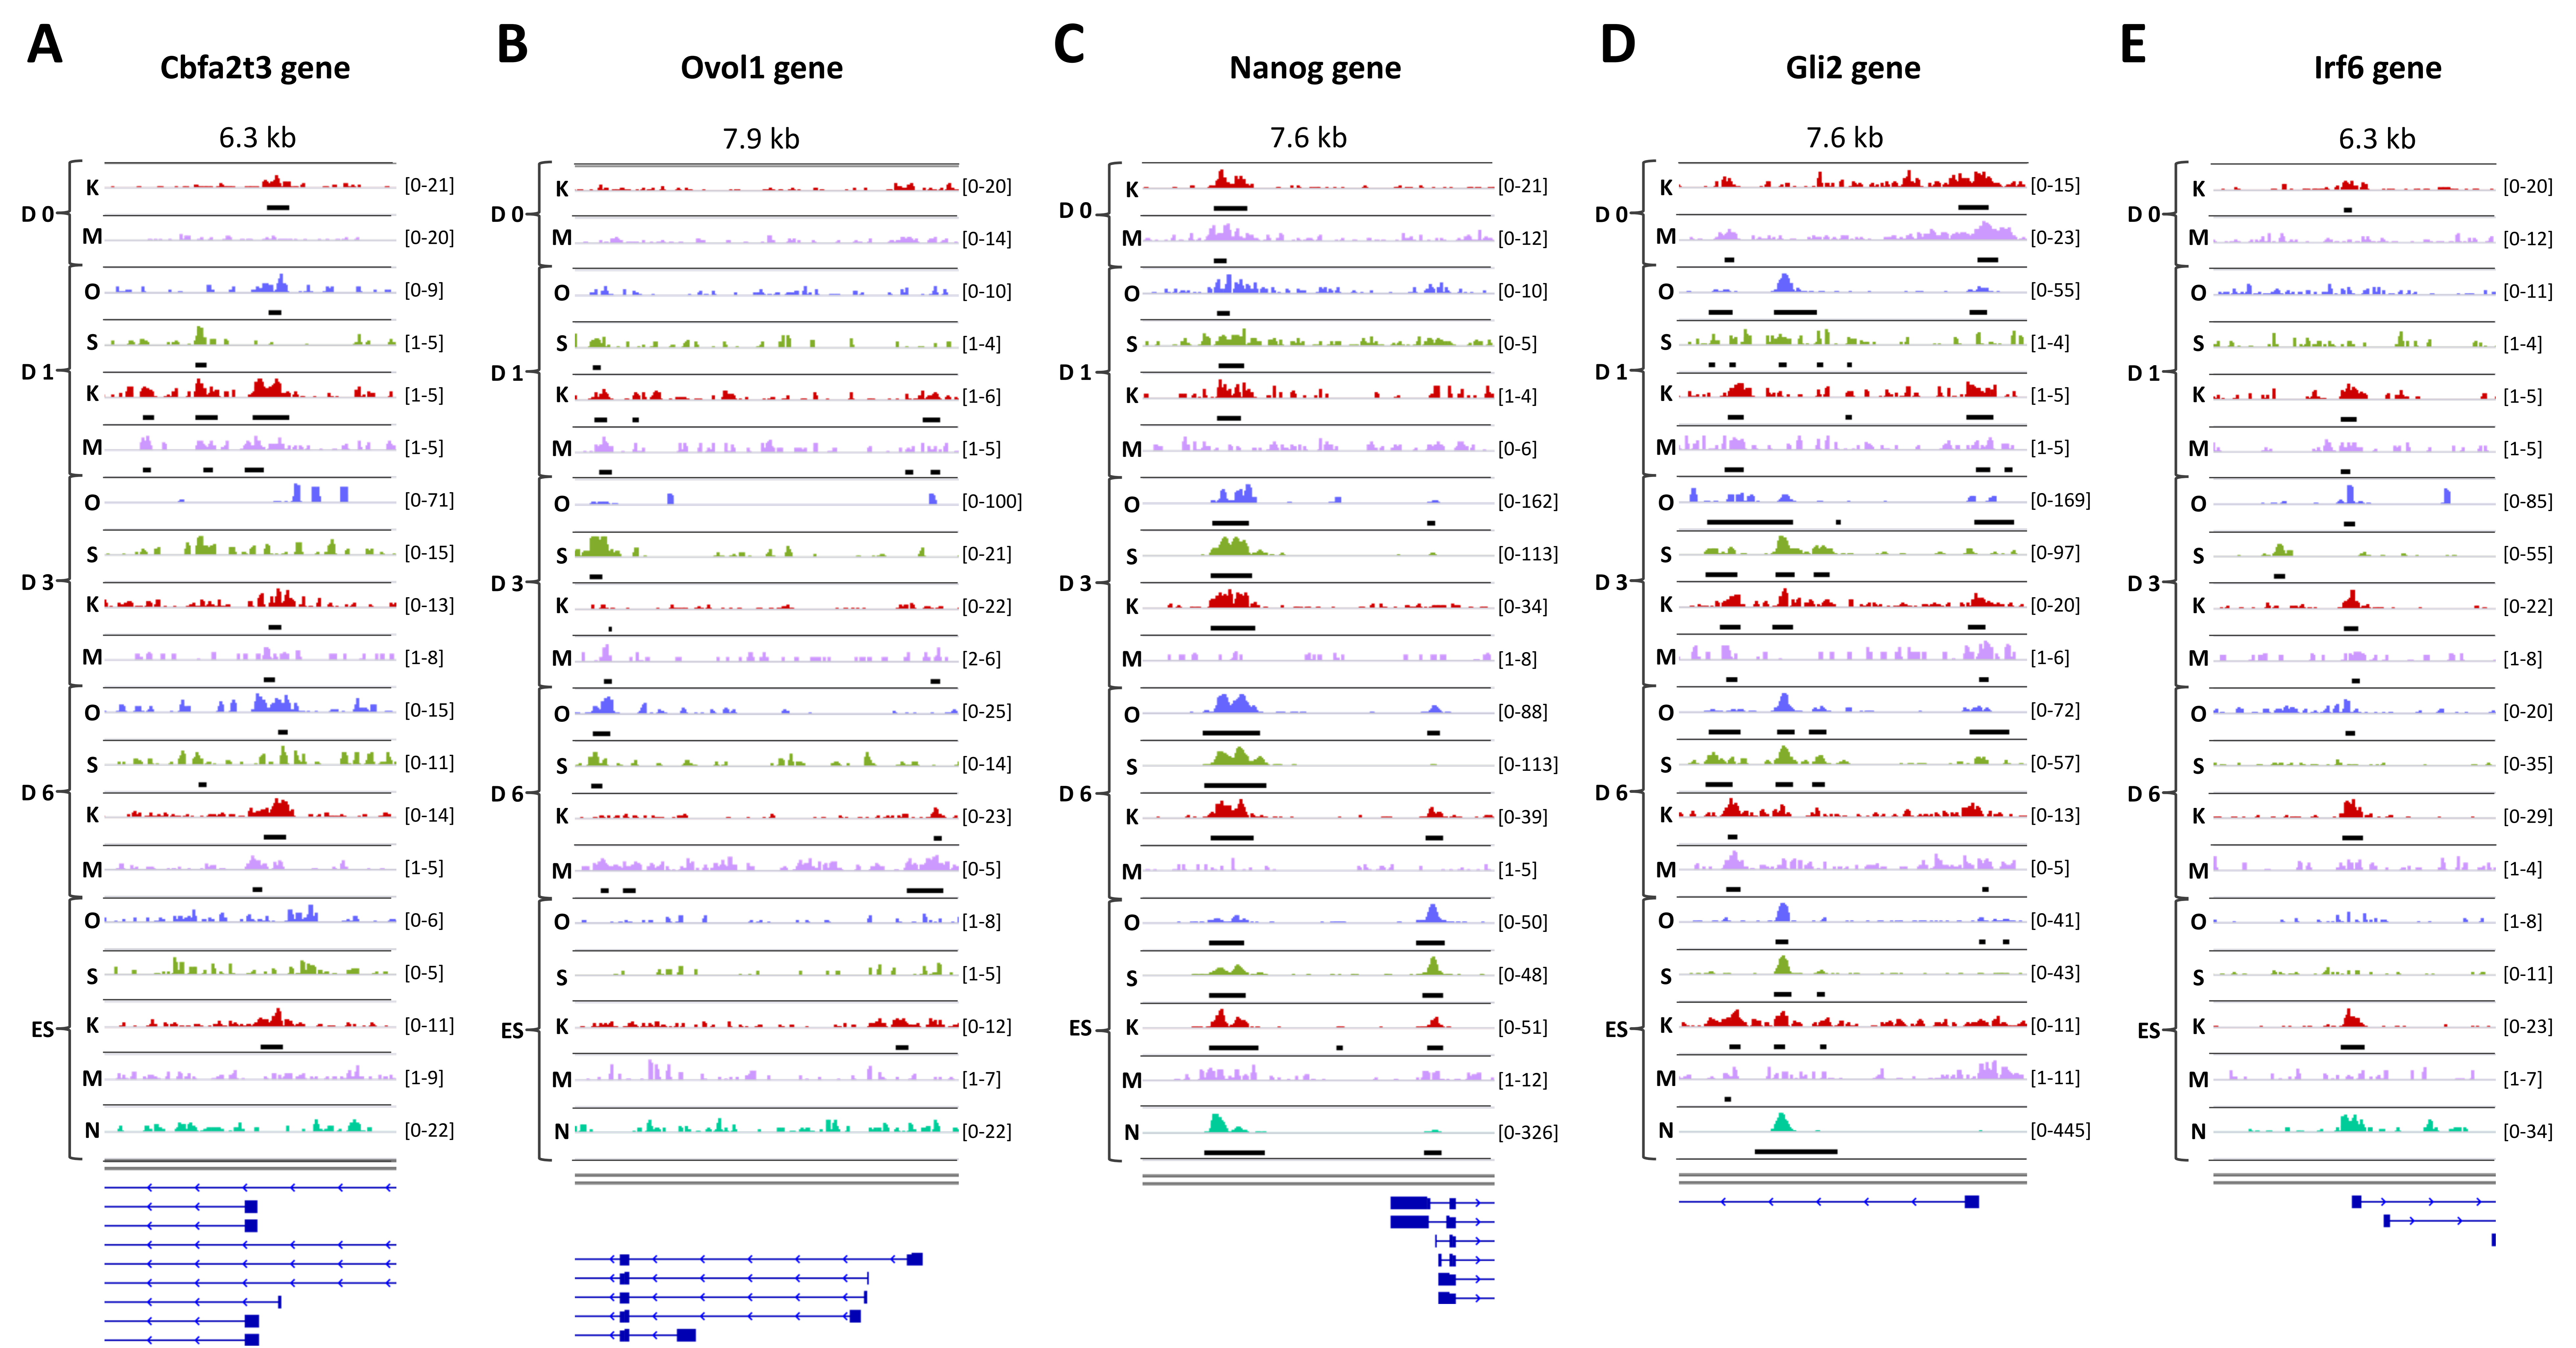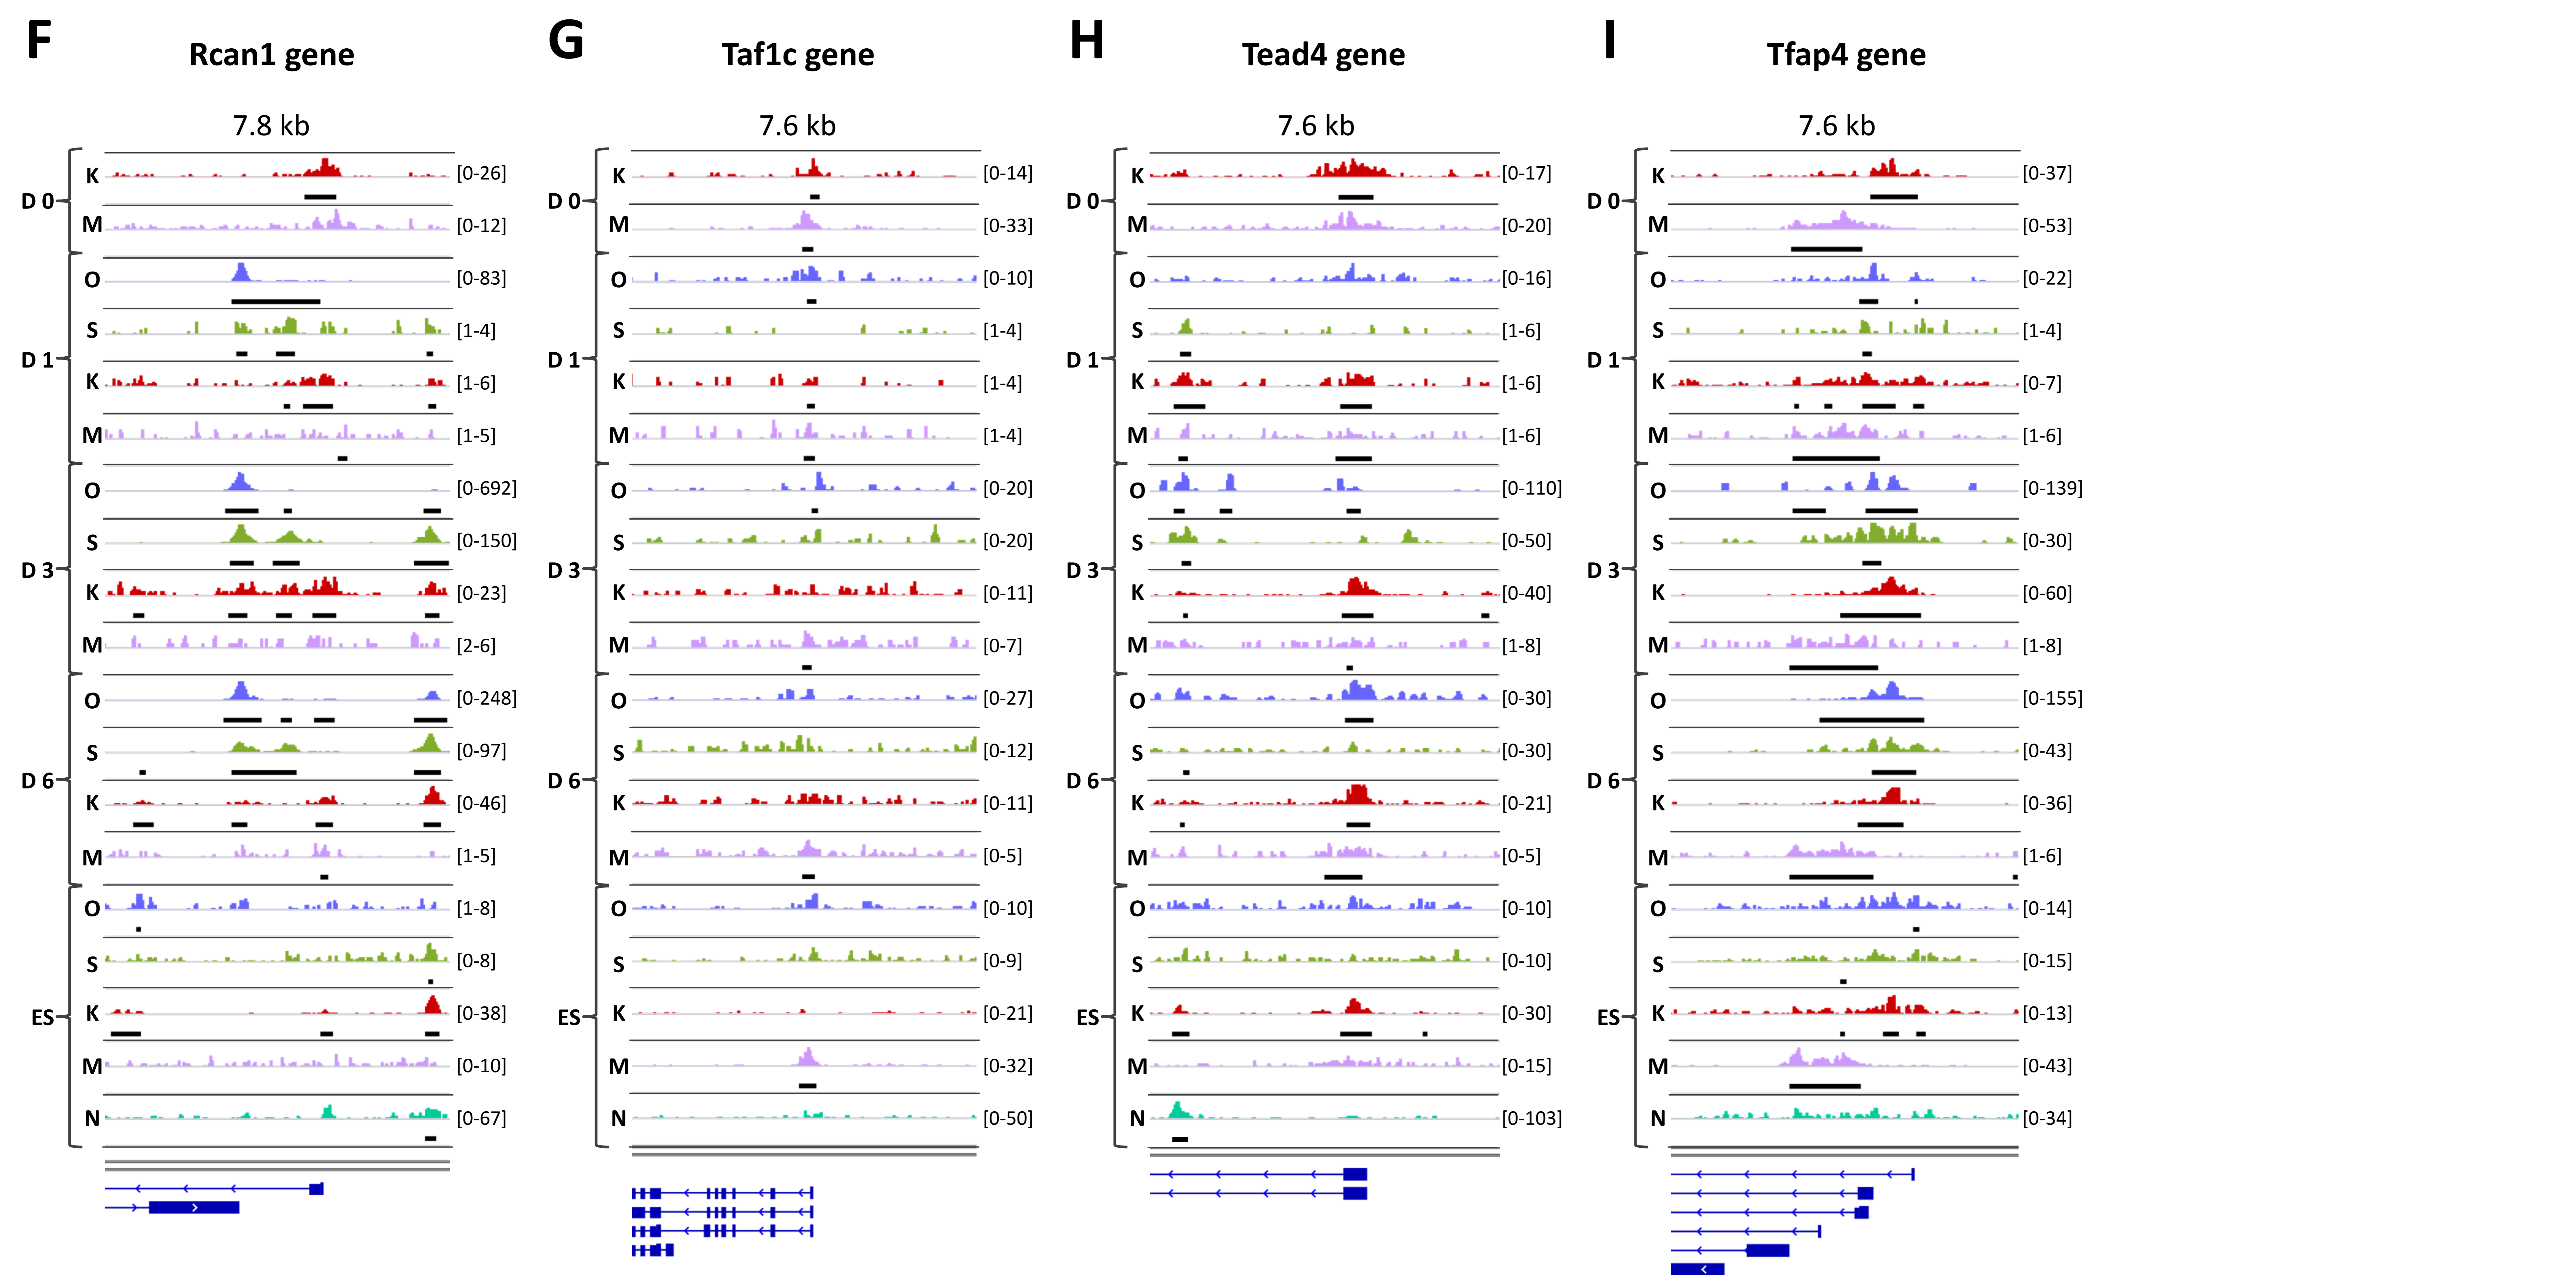

Supplement: Supplementary file 4 [file supplementary]

**C** Cluster 3  
Score: 8.545

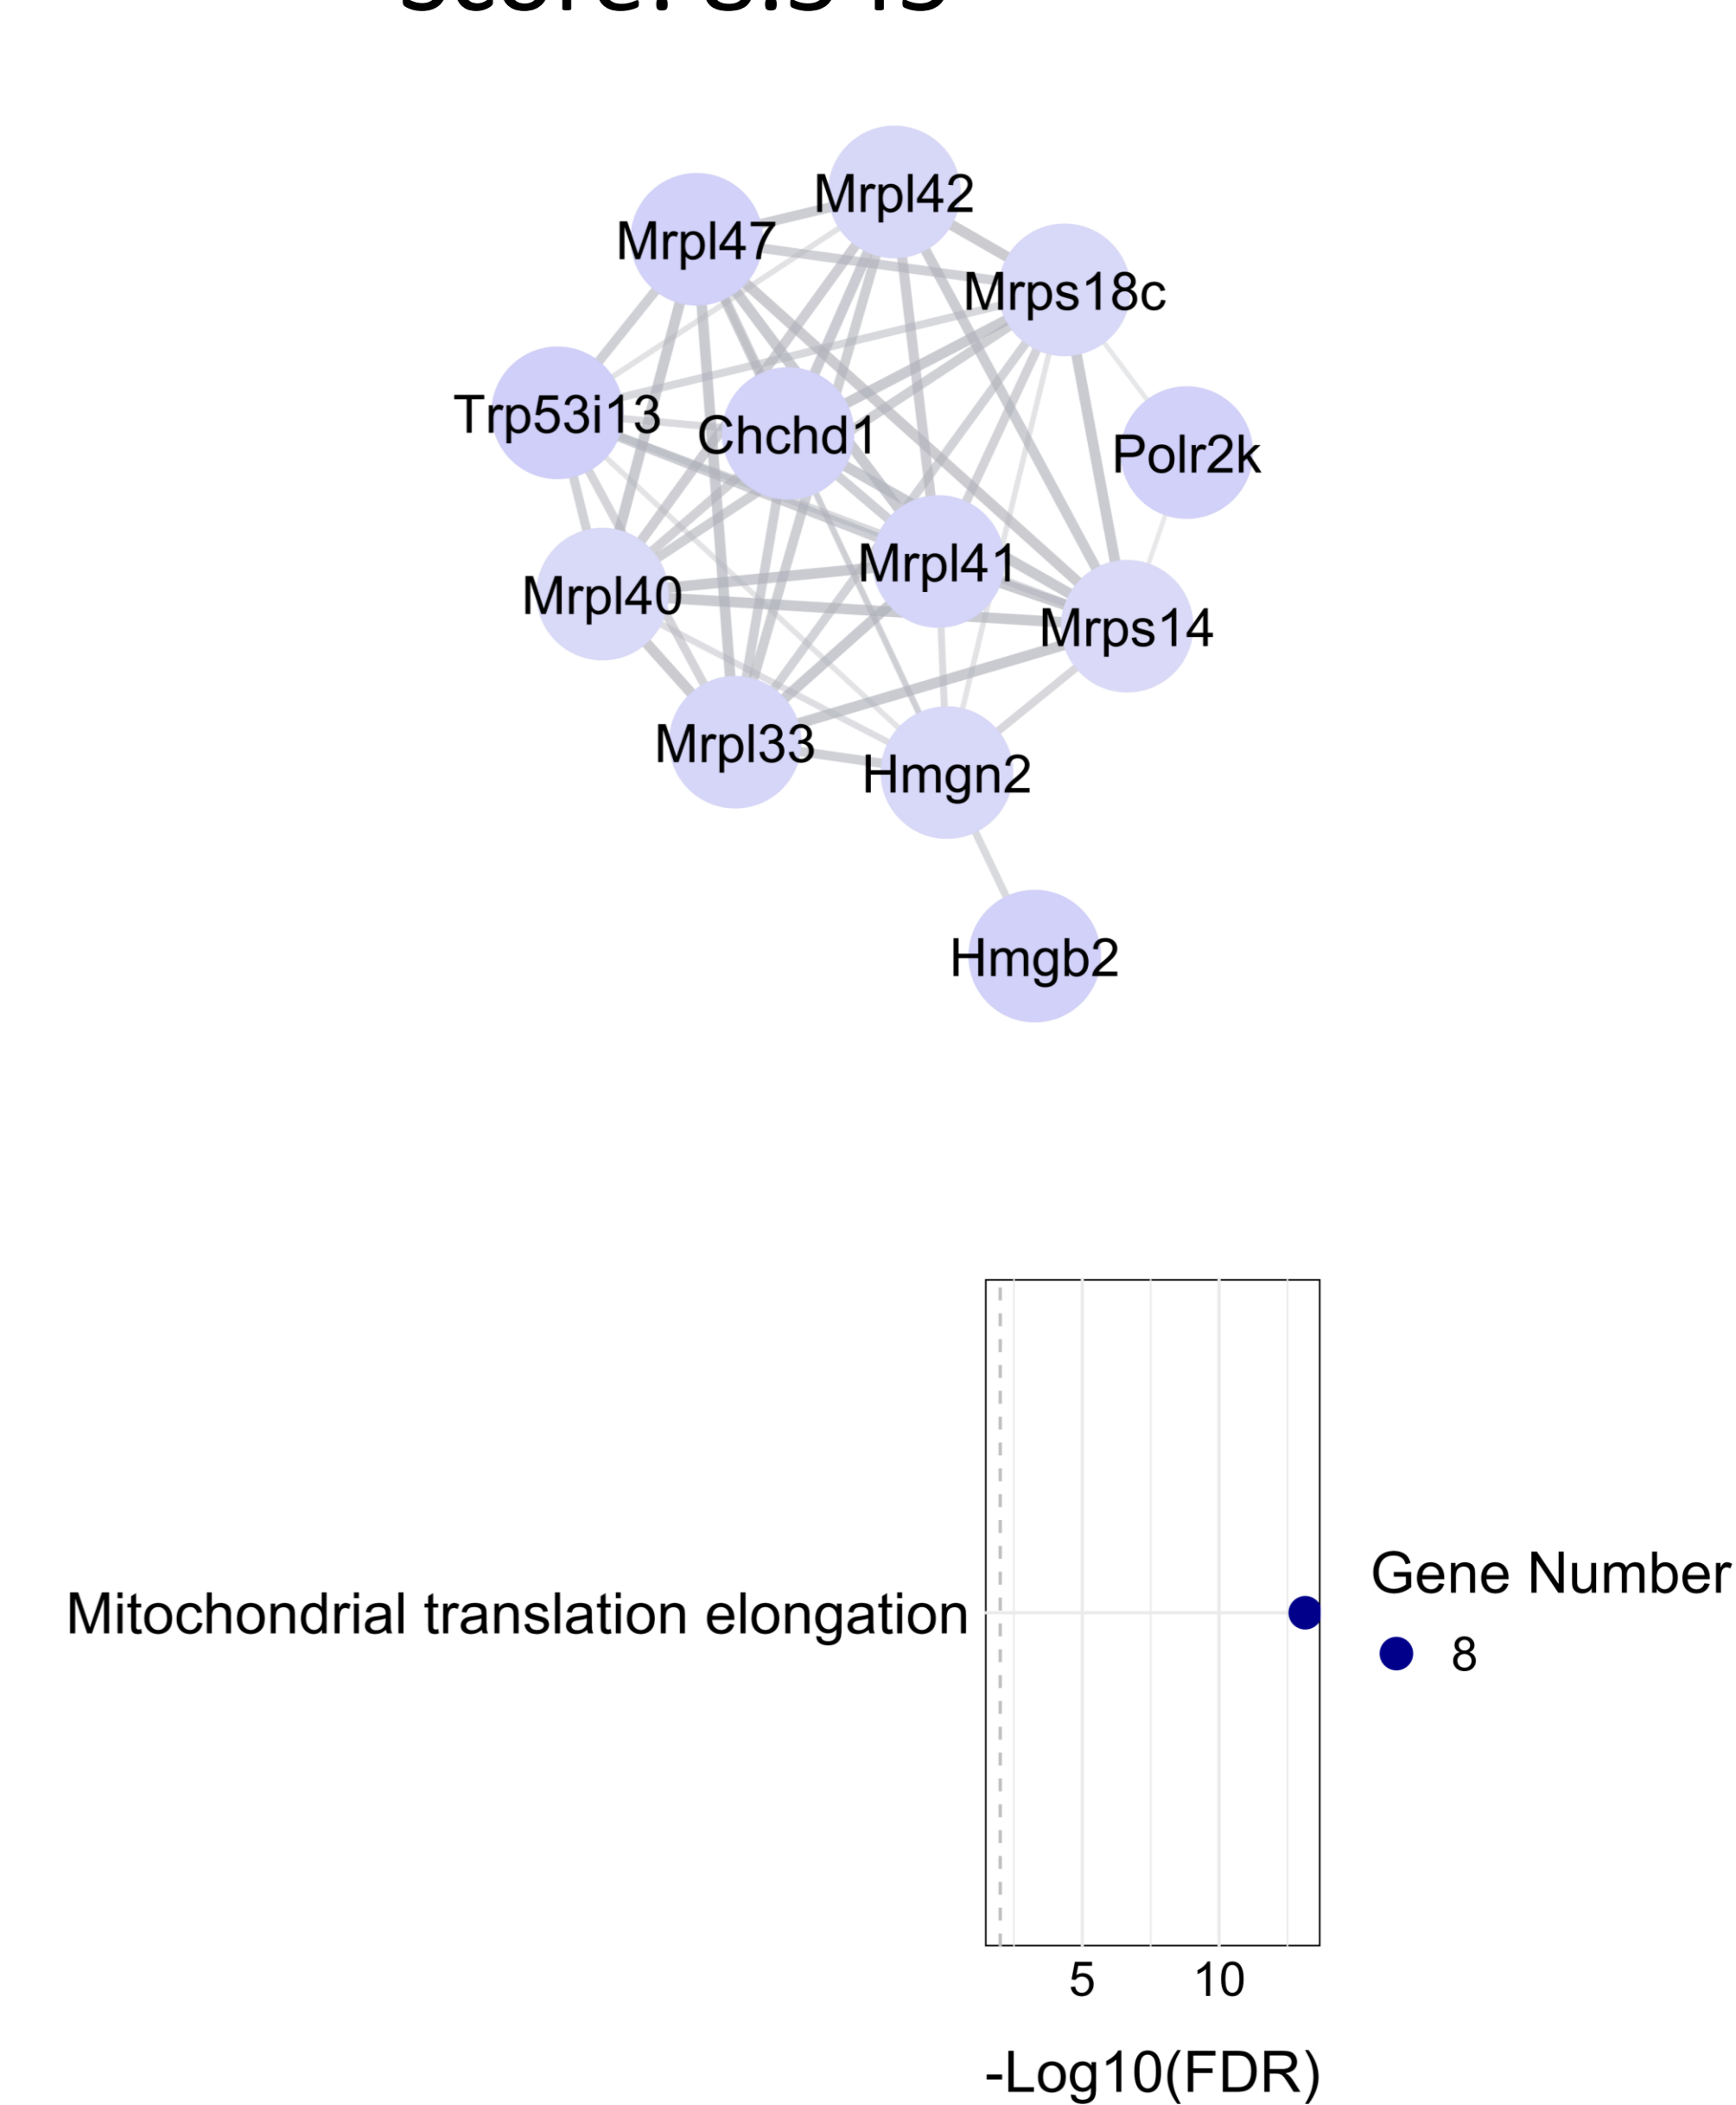

**F** Cluster 6  
Score: 5.6

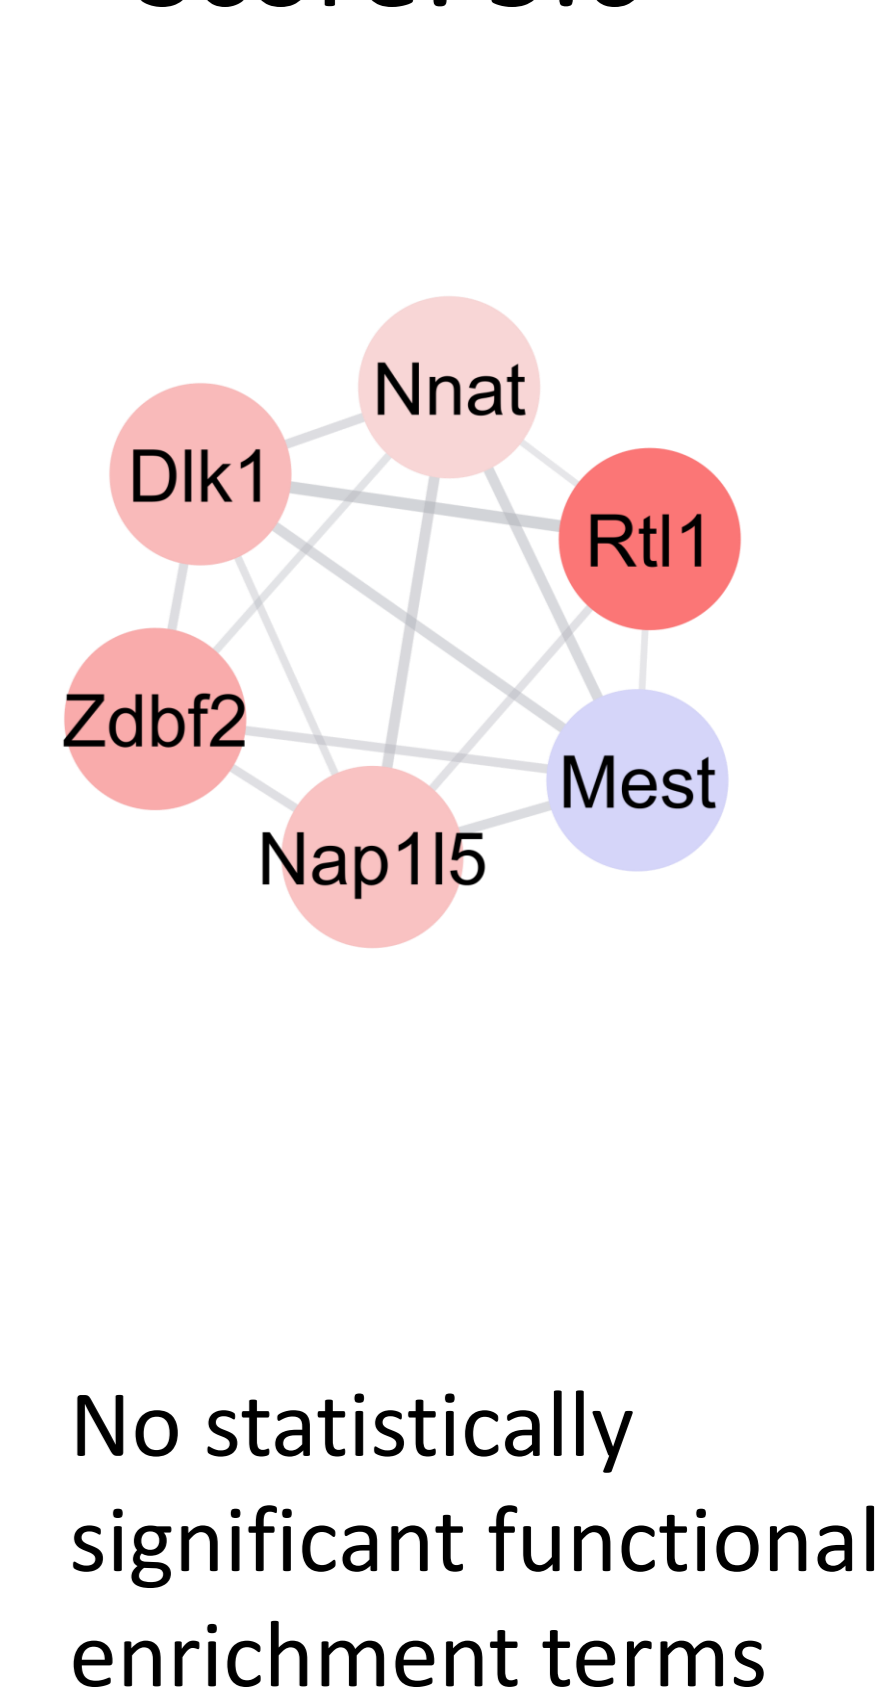

**H** Cluster 8  
Score: 4.098

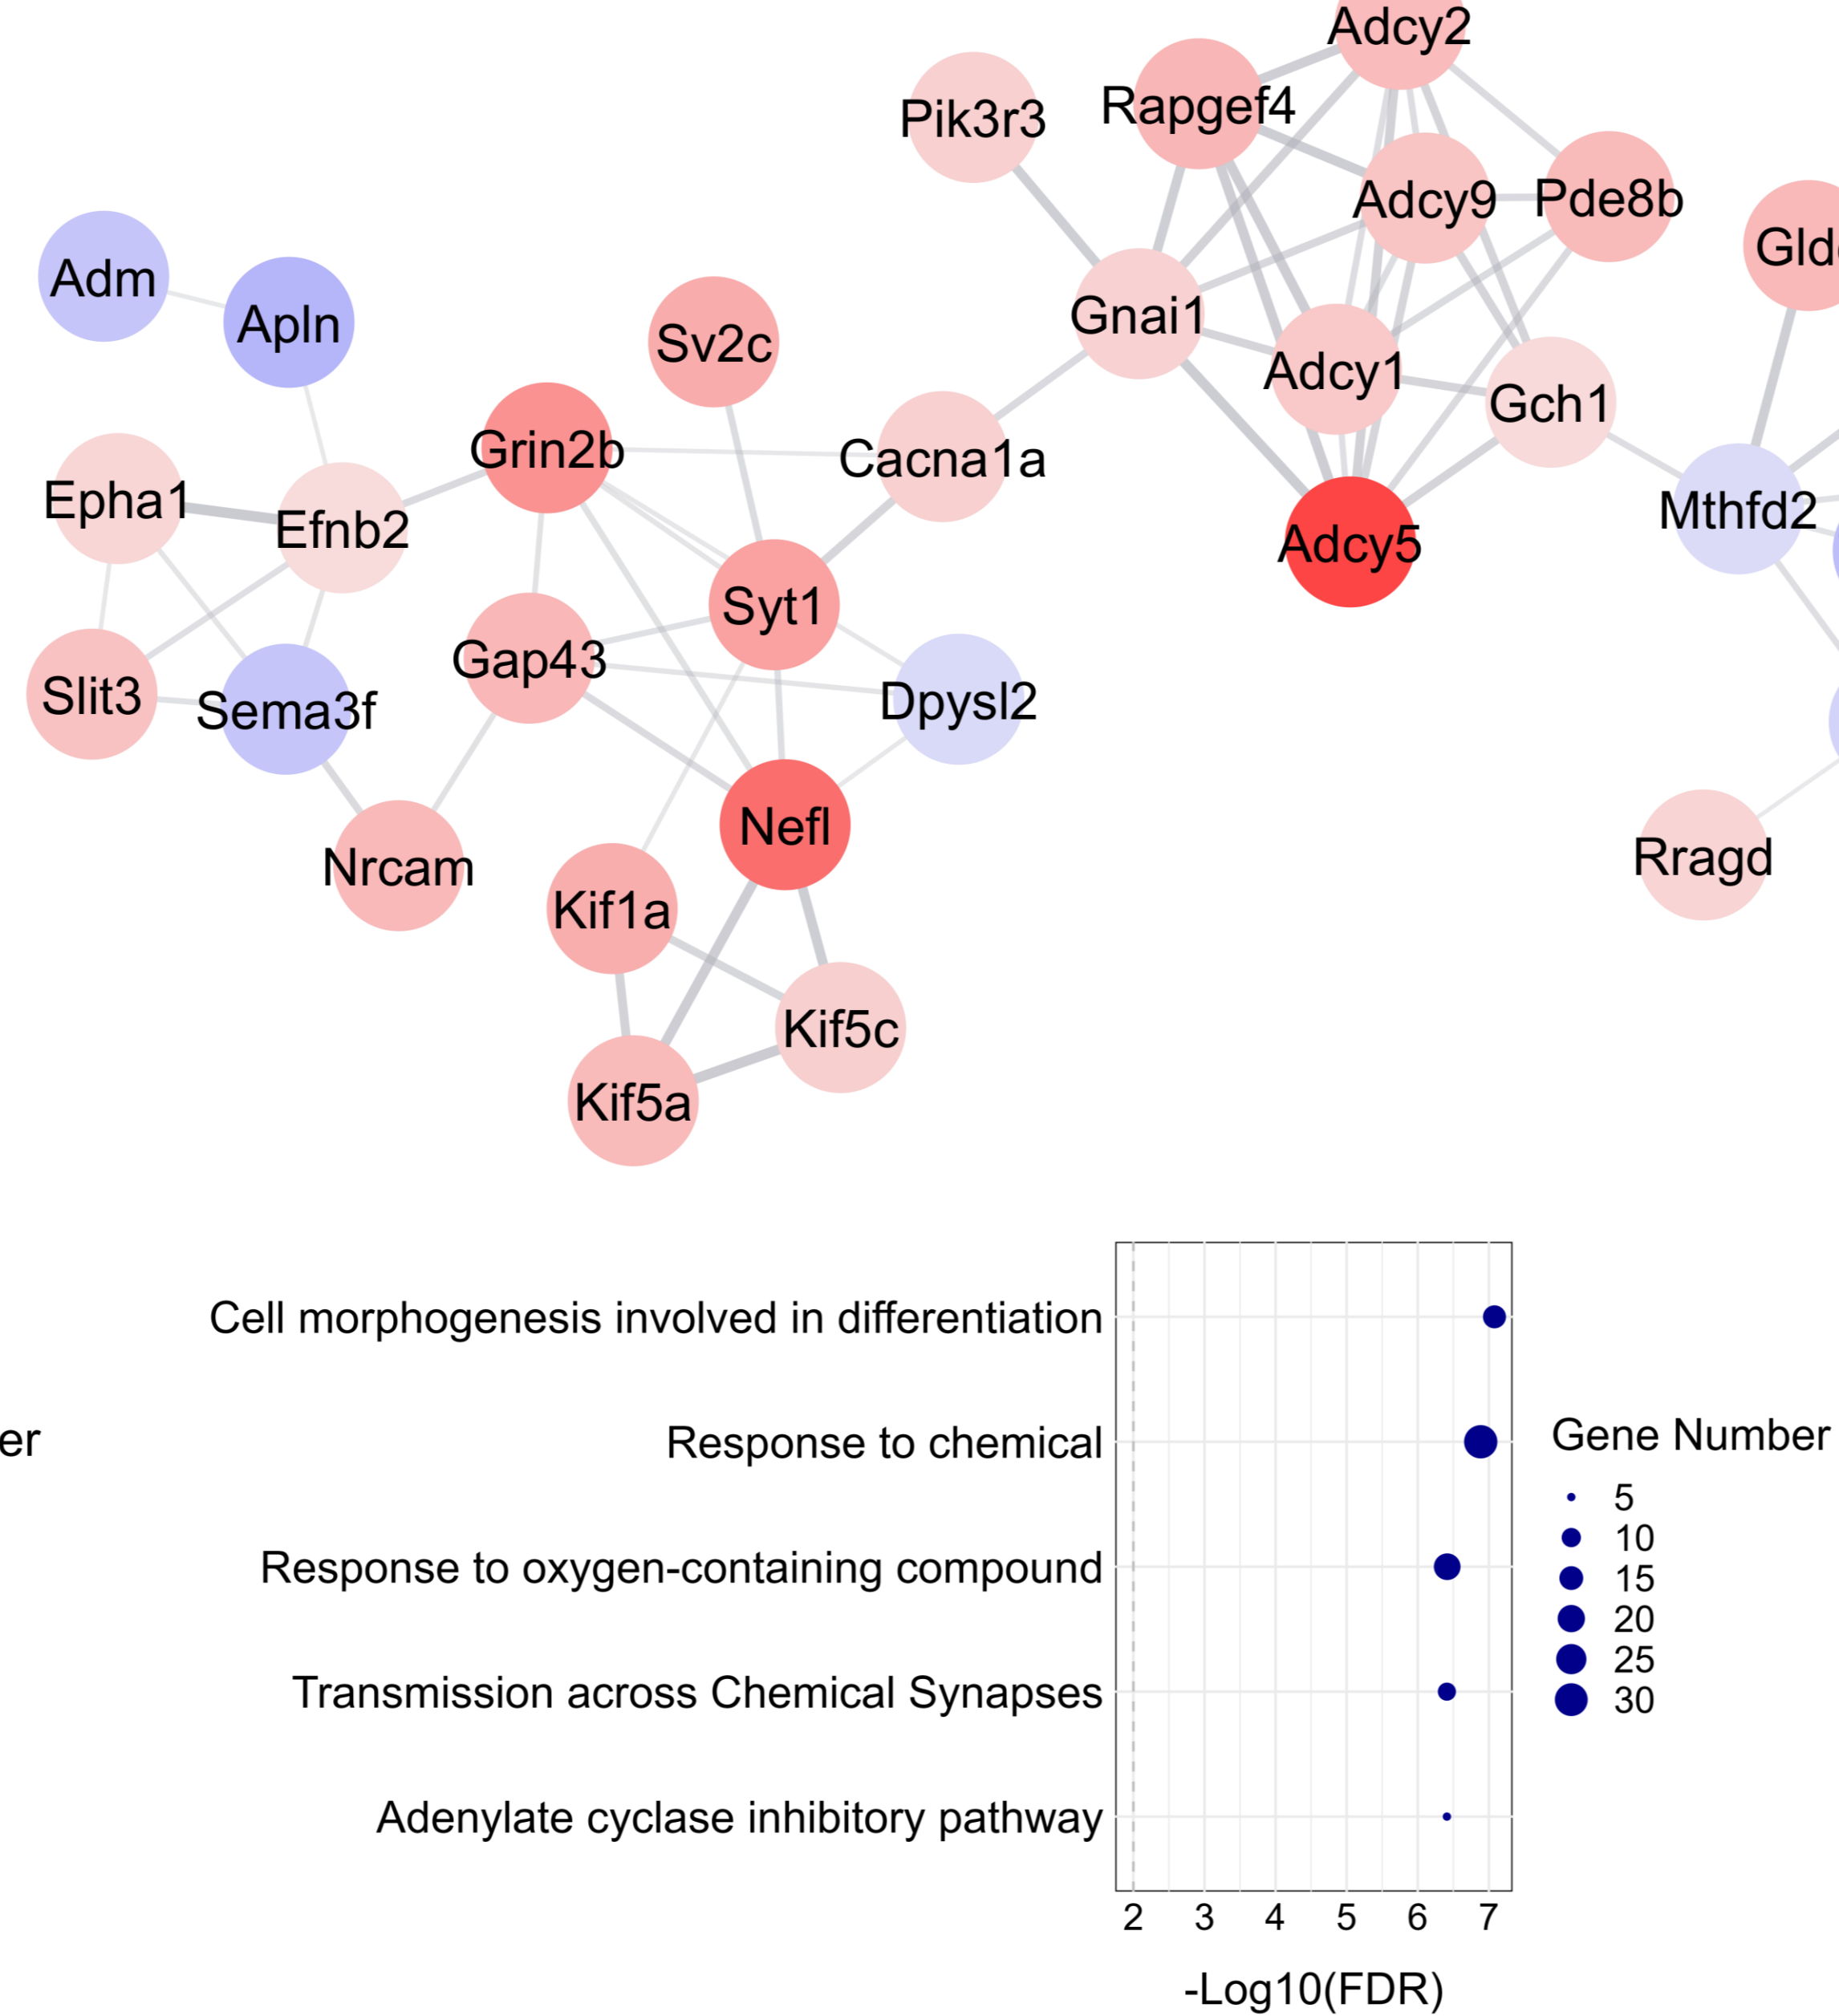

**J** Cluster 10  
Score: 3.333

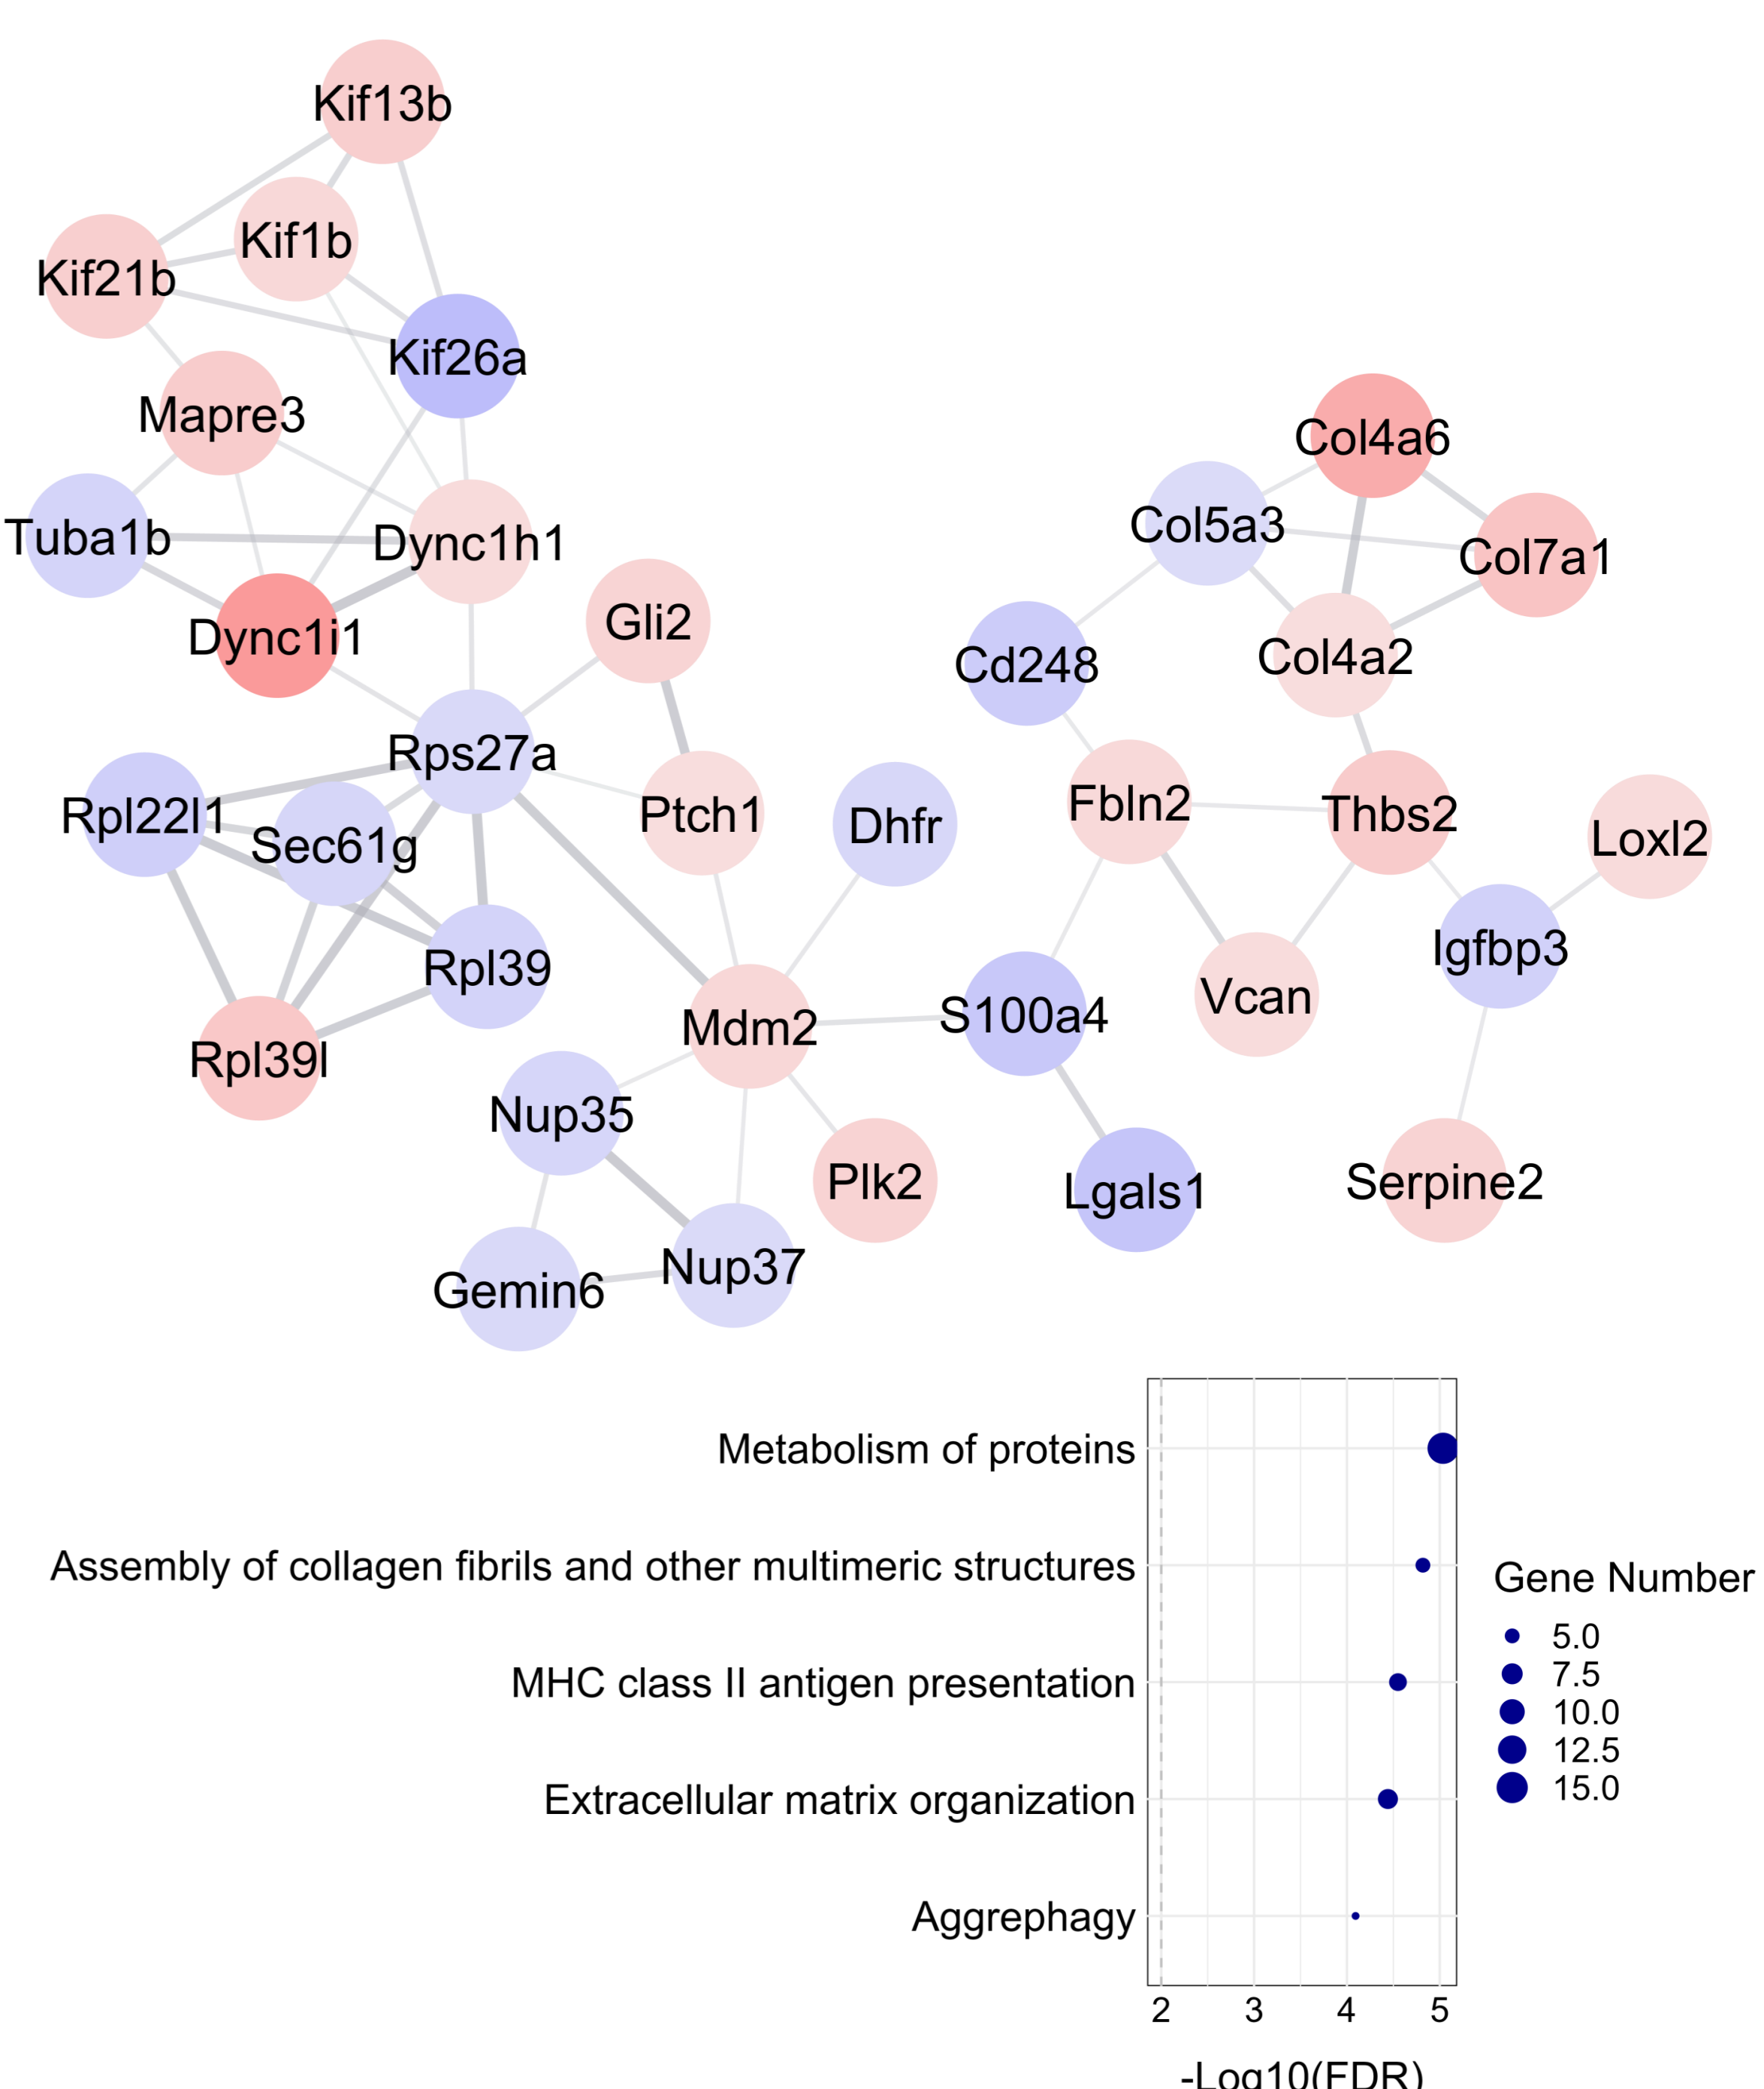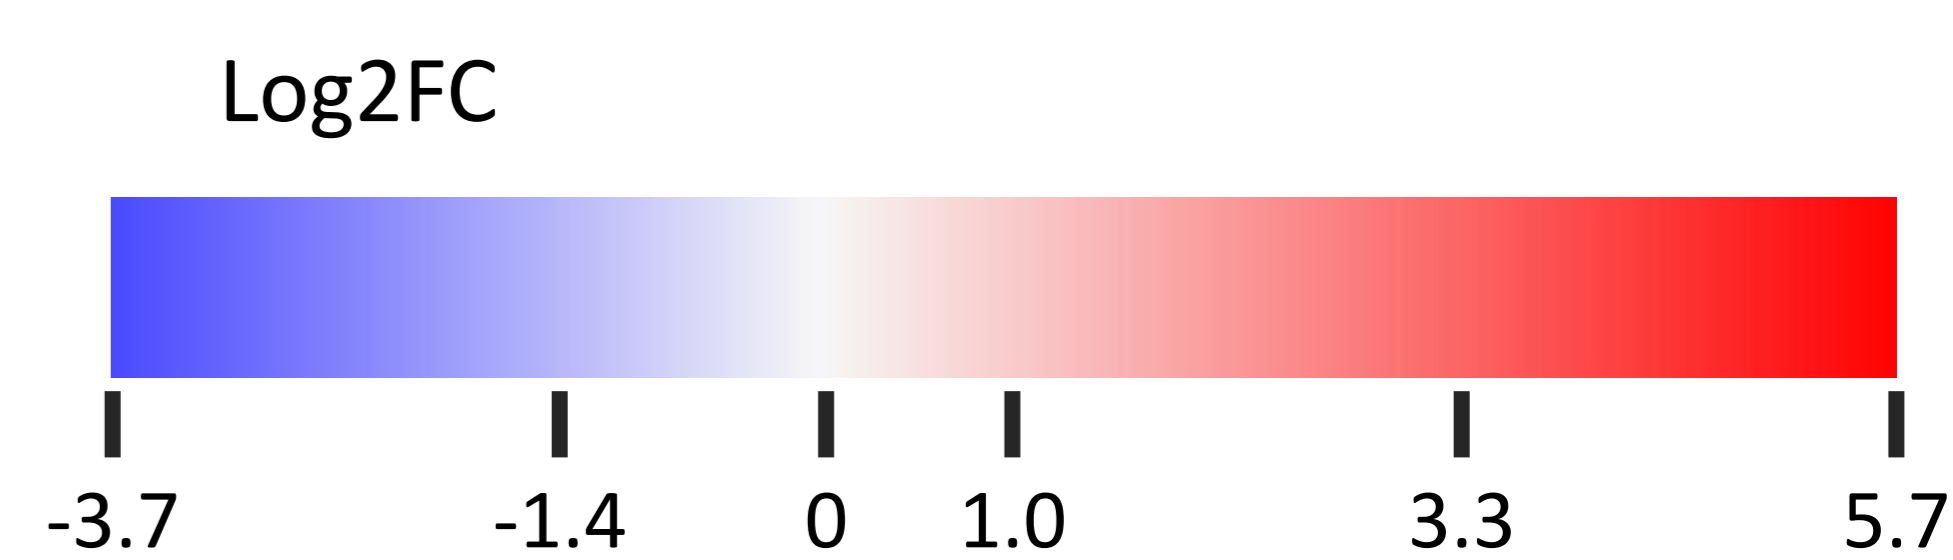

Supplement: Supplementary file 5 [file supplementary]

## A Lefty1<sub>700</sub>-GFP

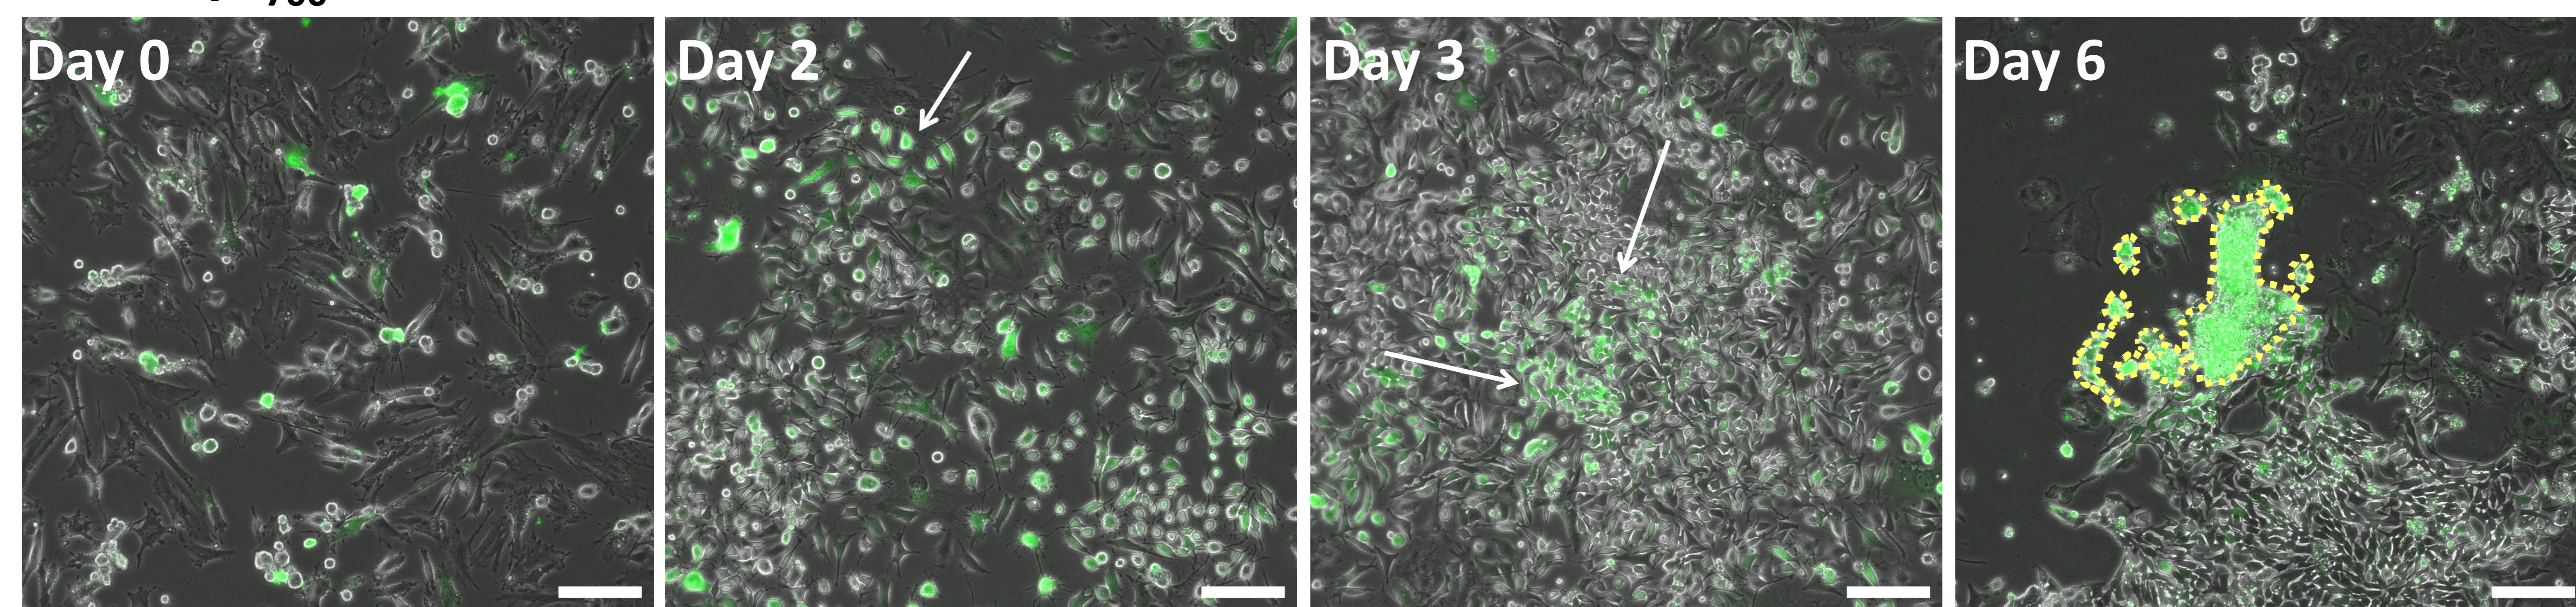

## B Pou5f1<sub>1800</sub>-GFP

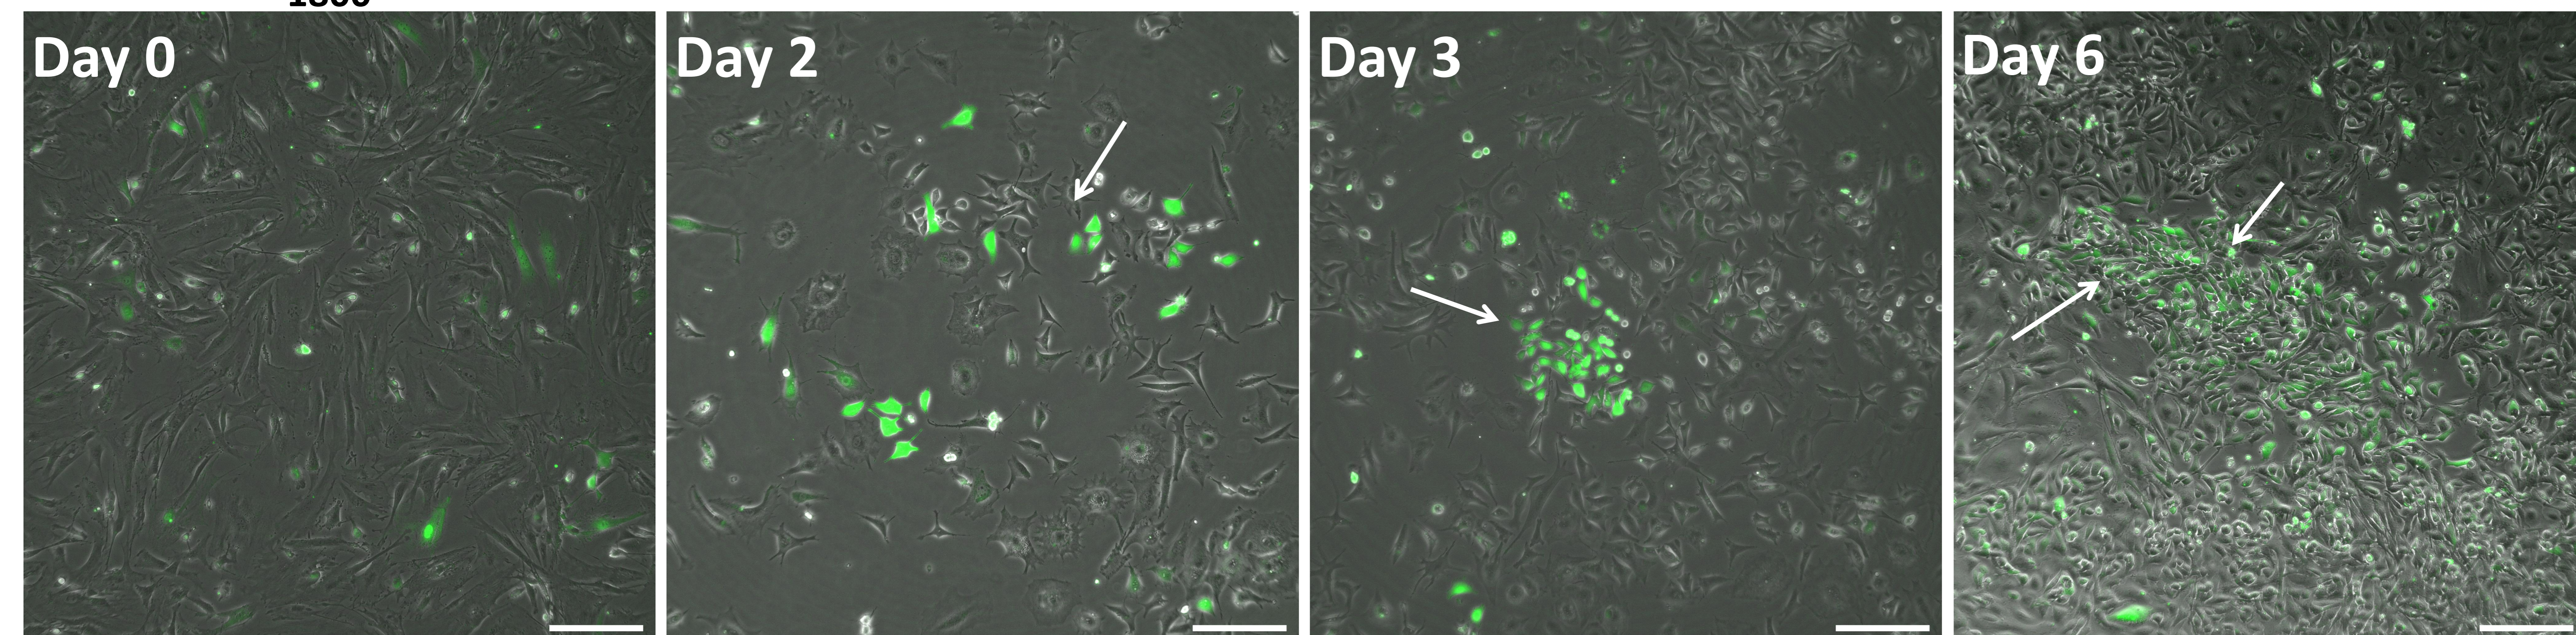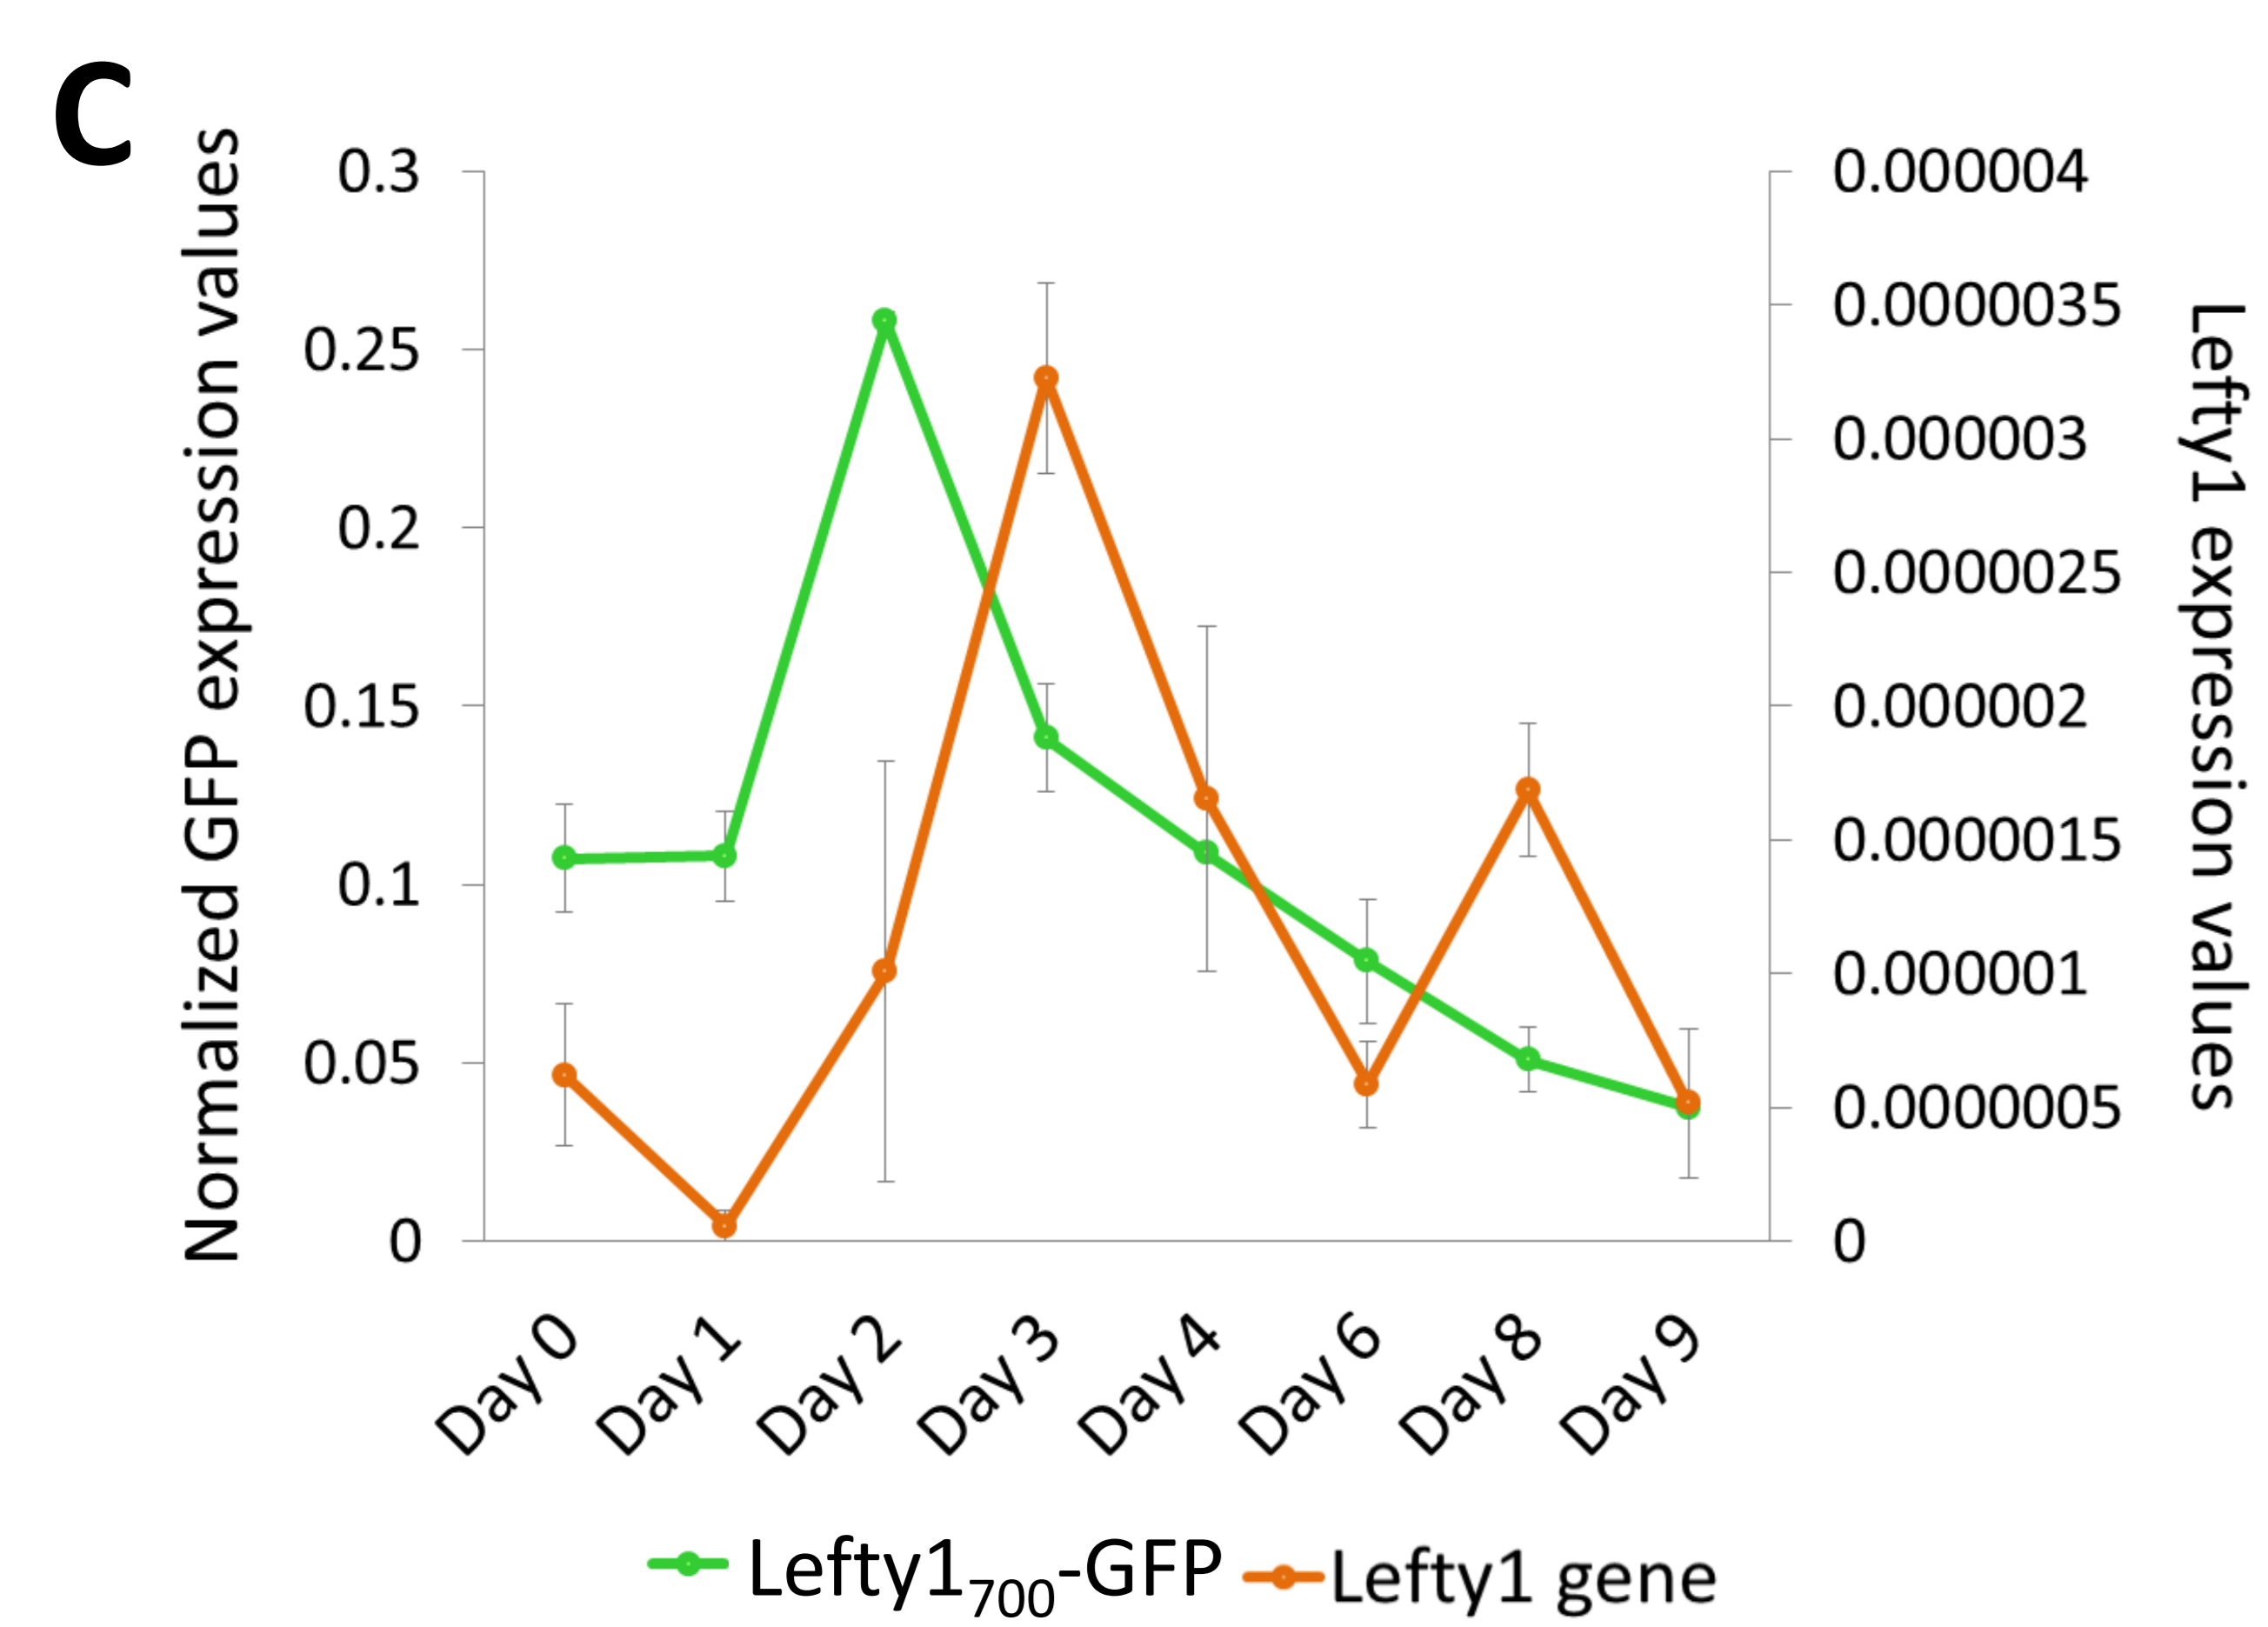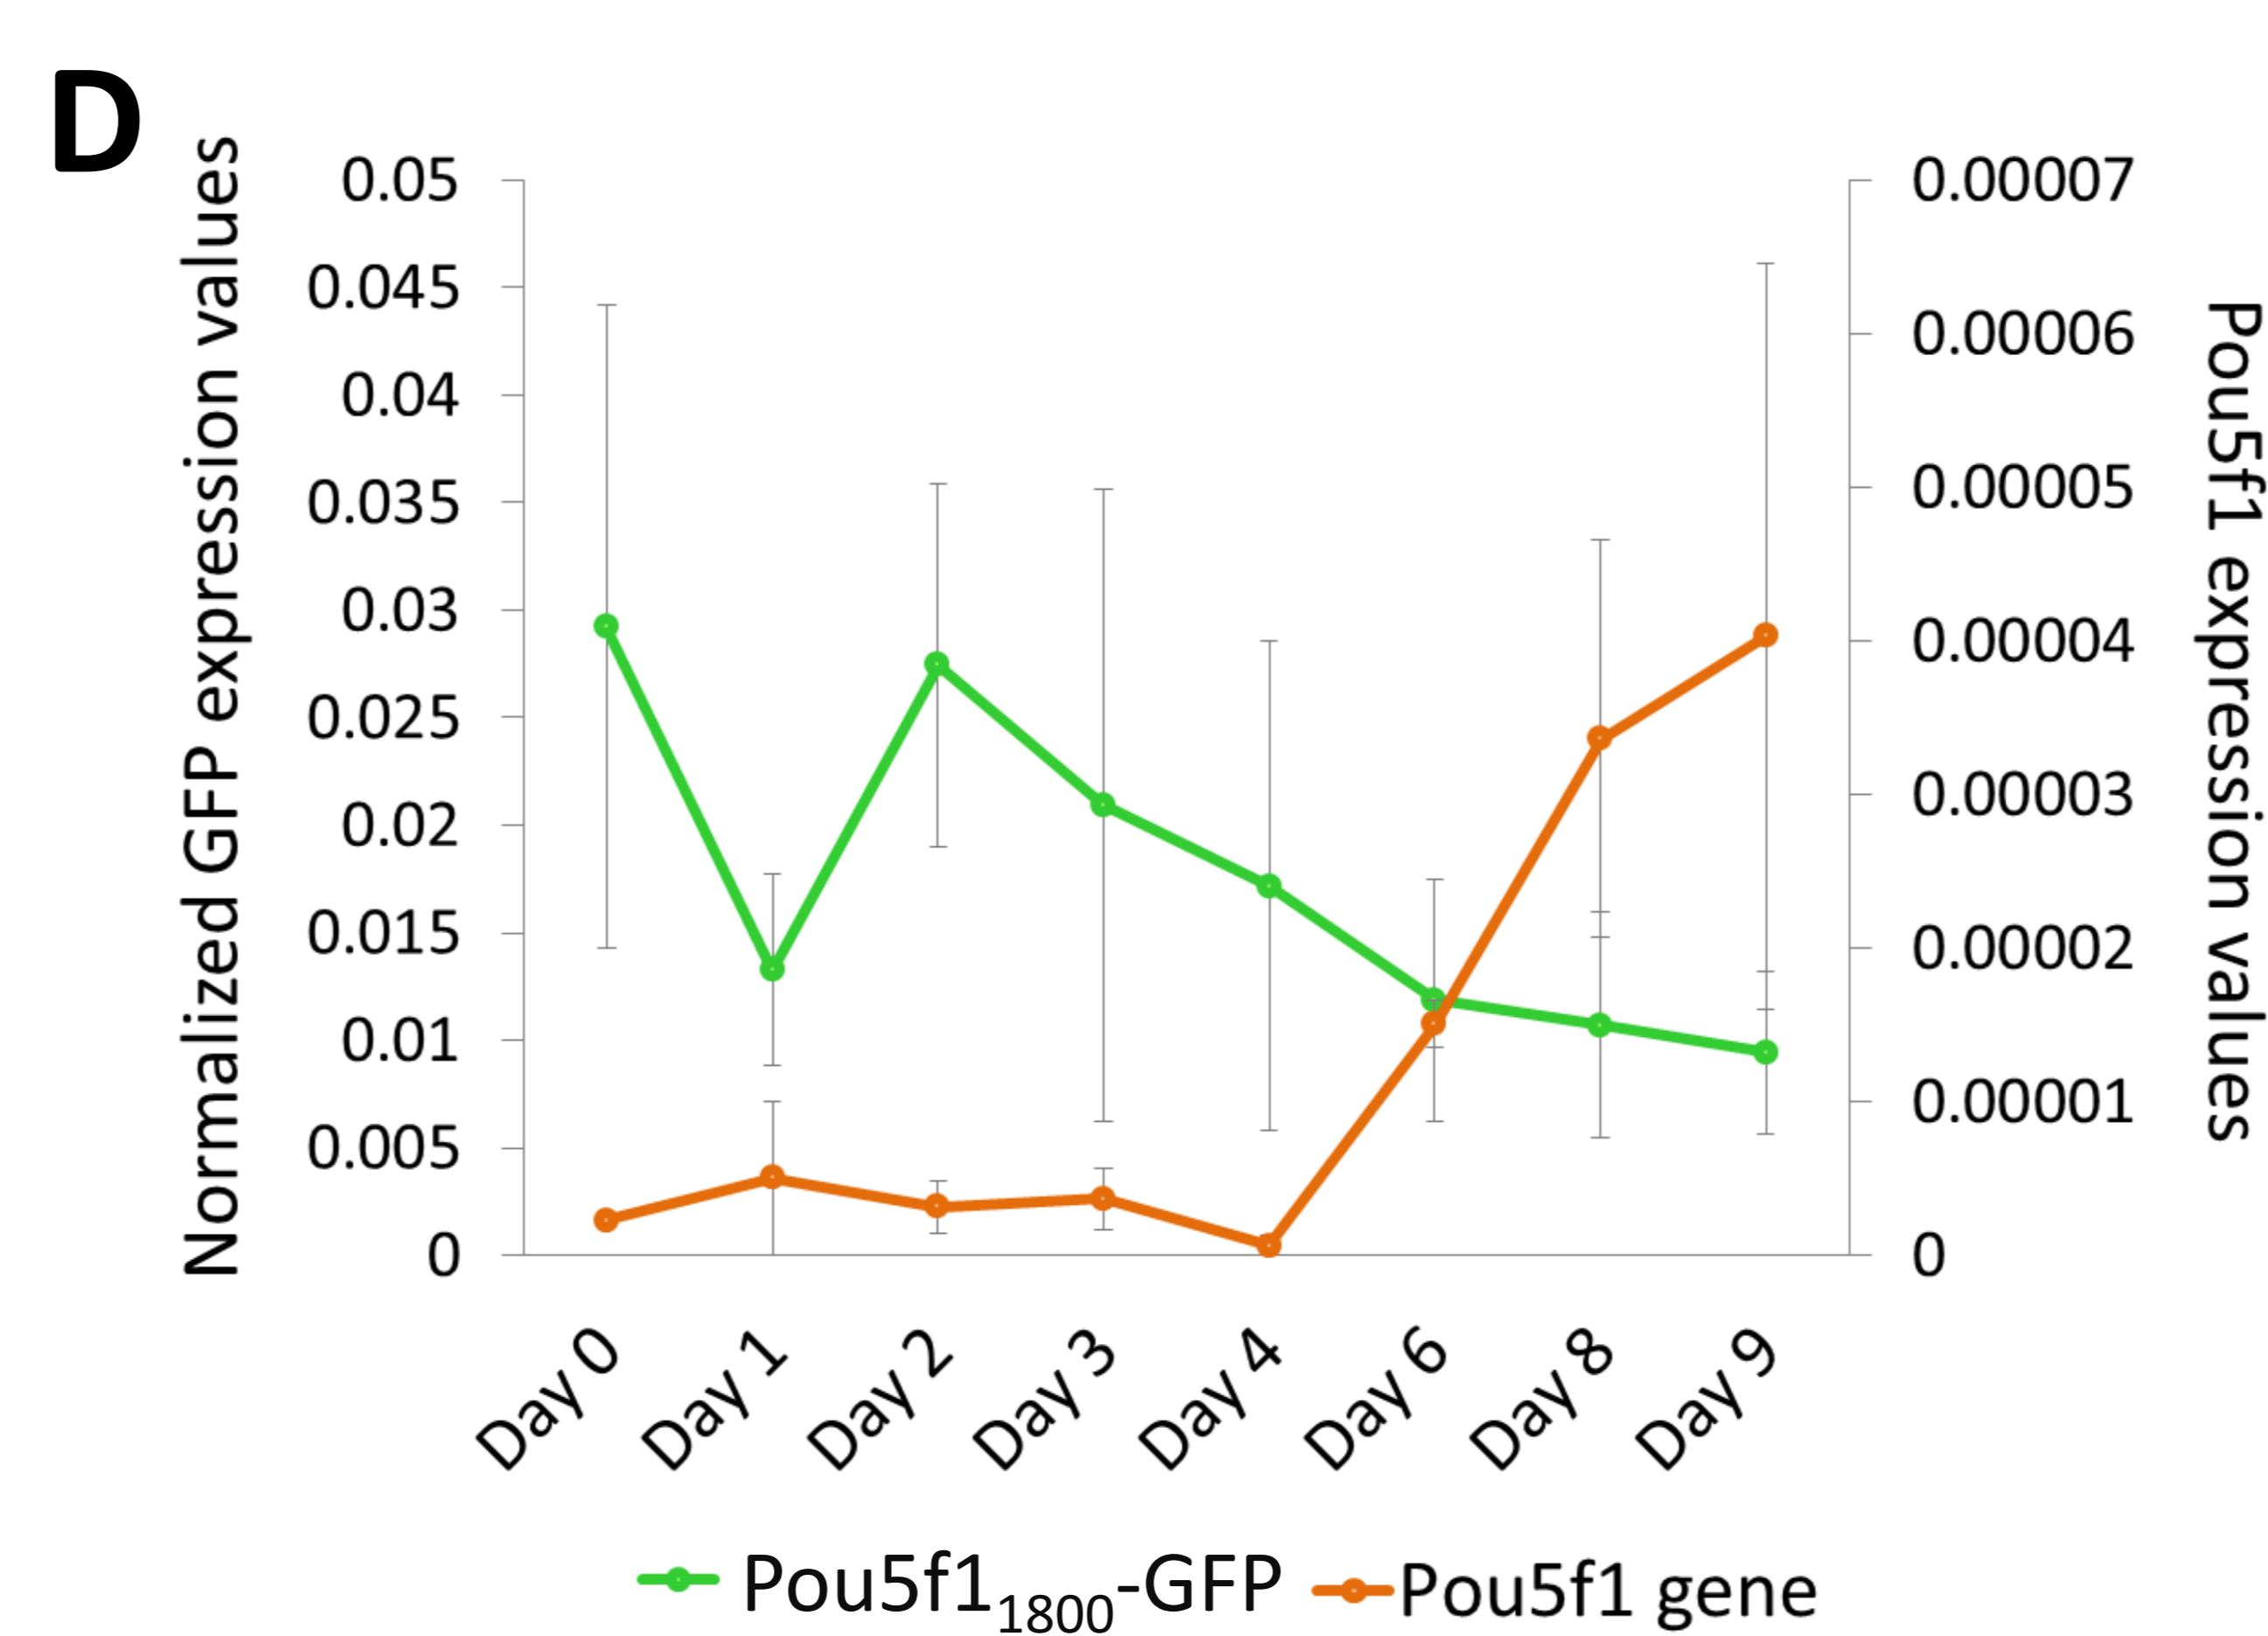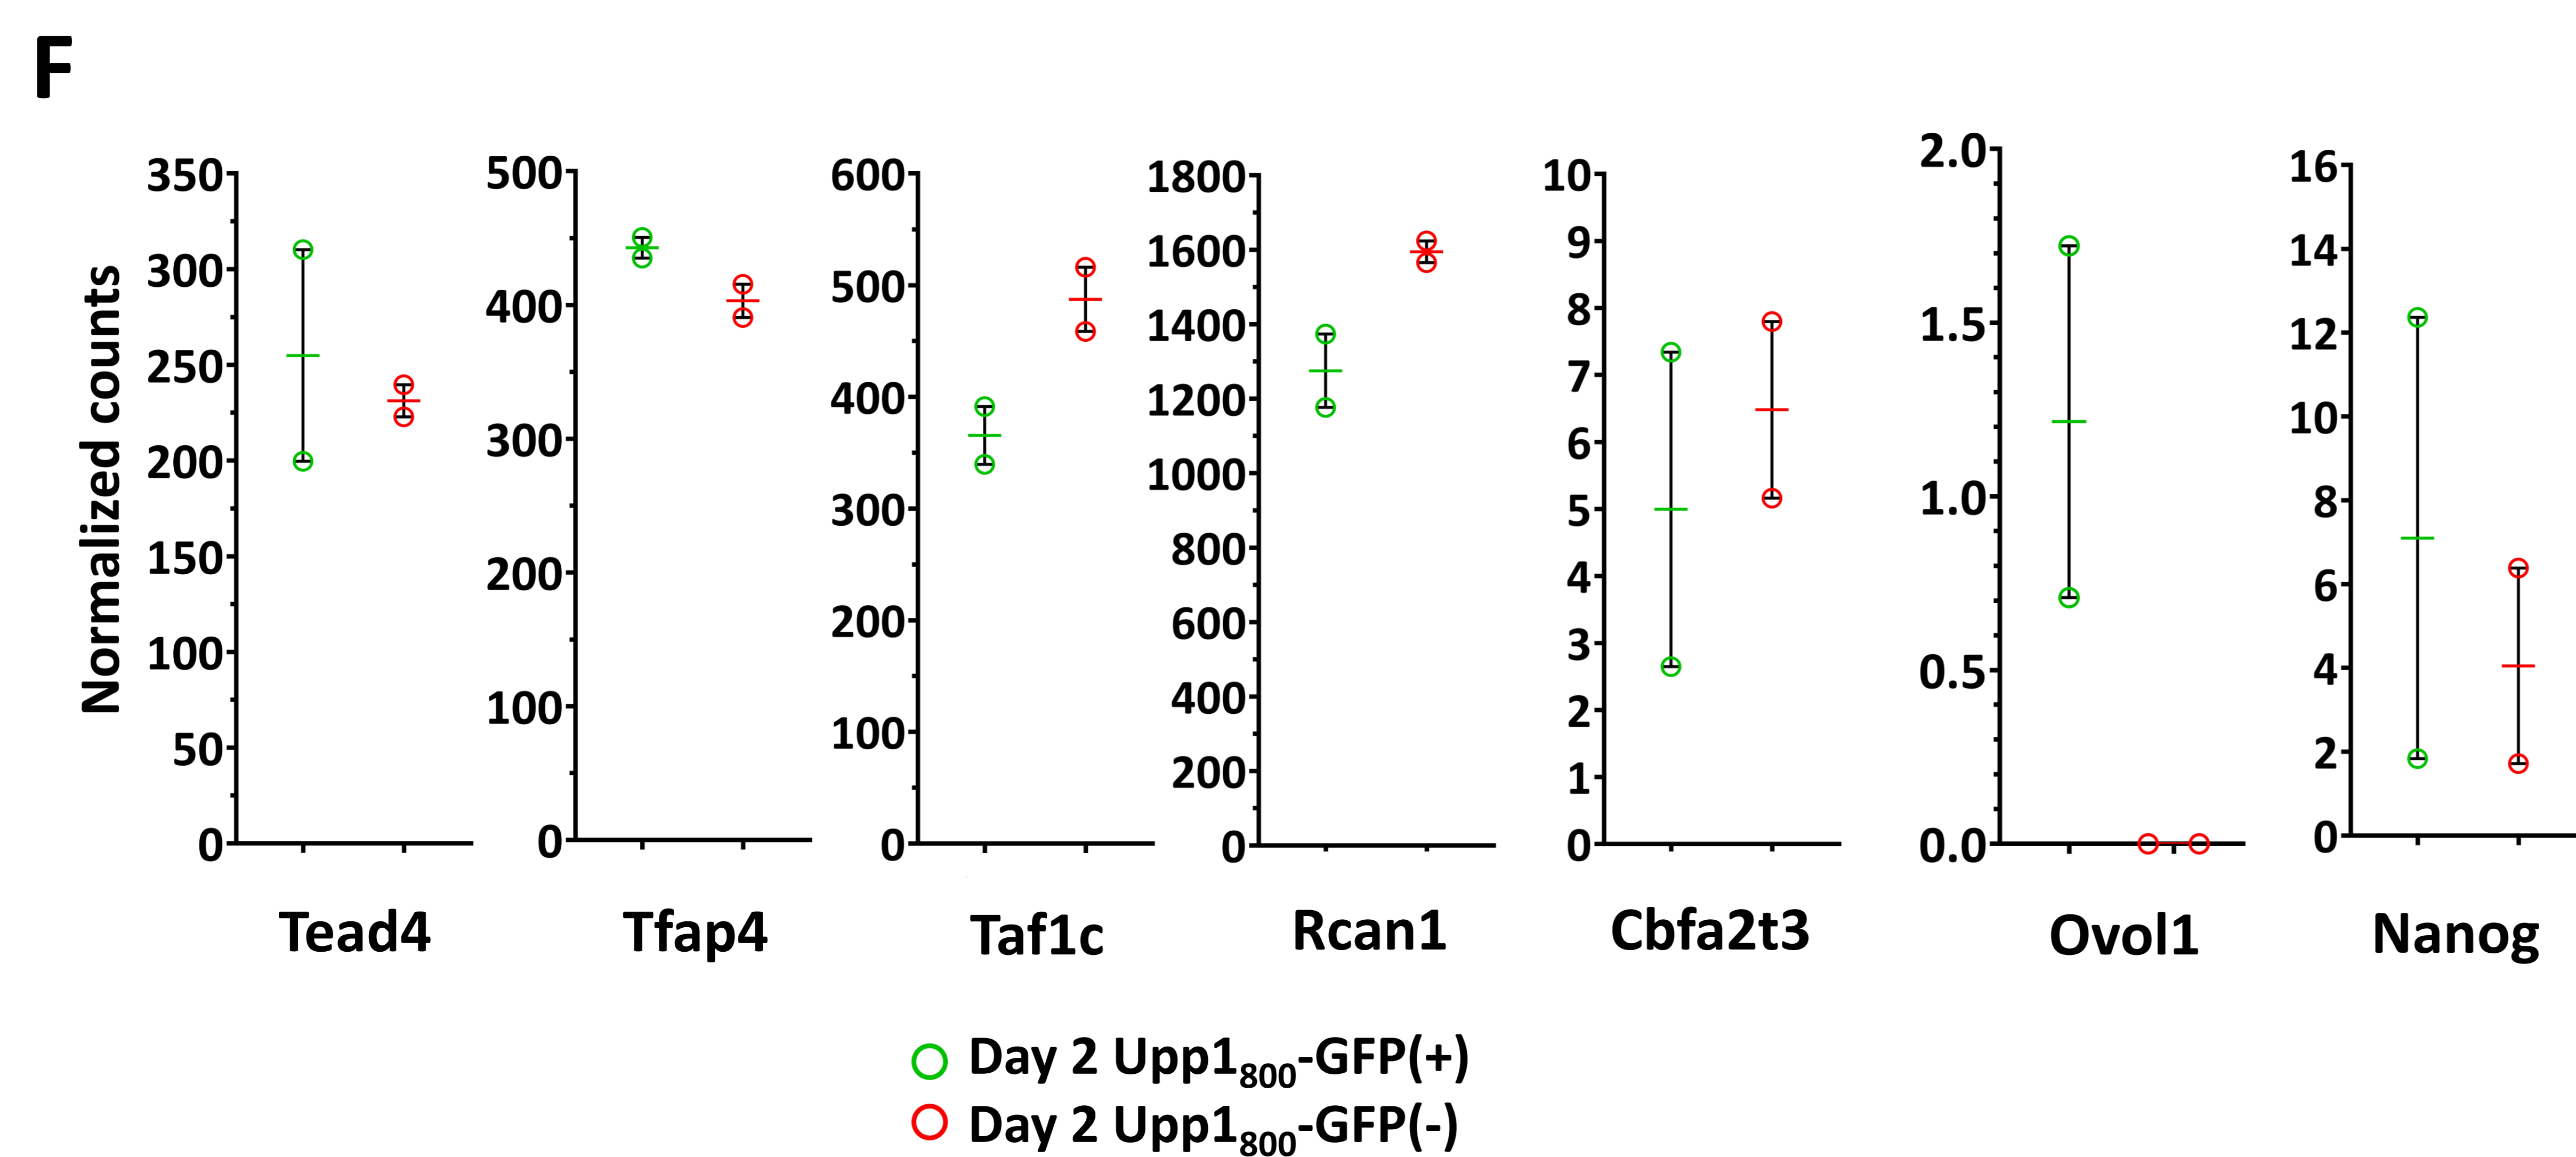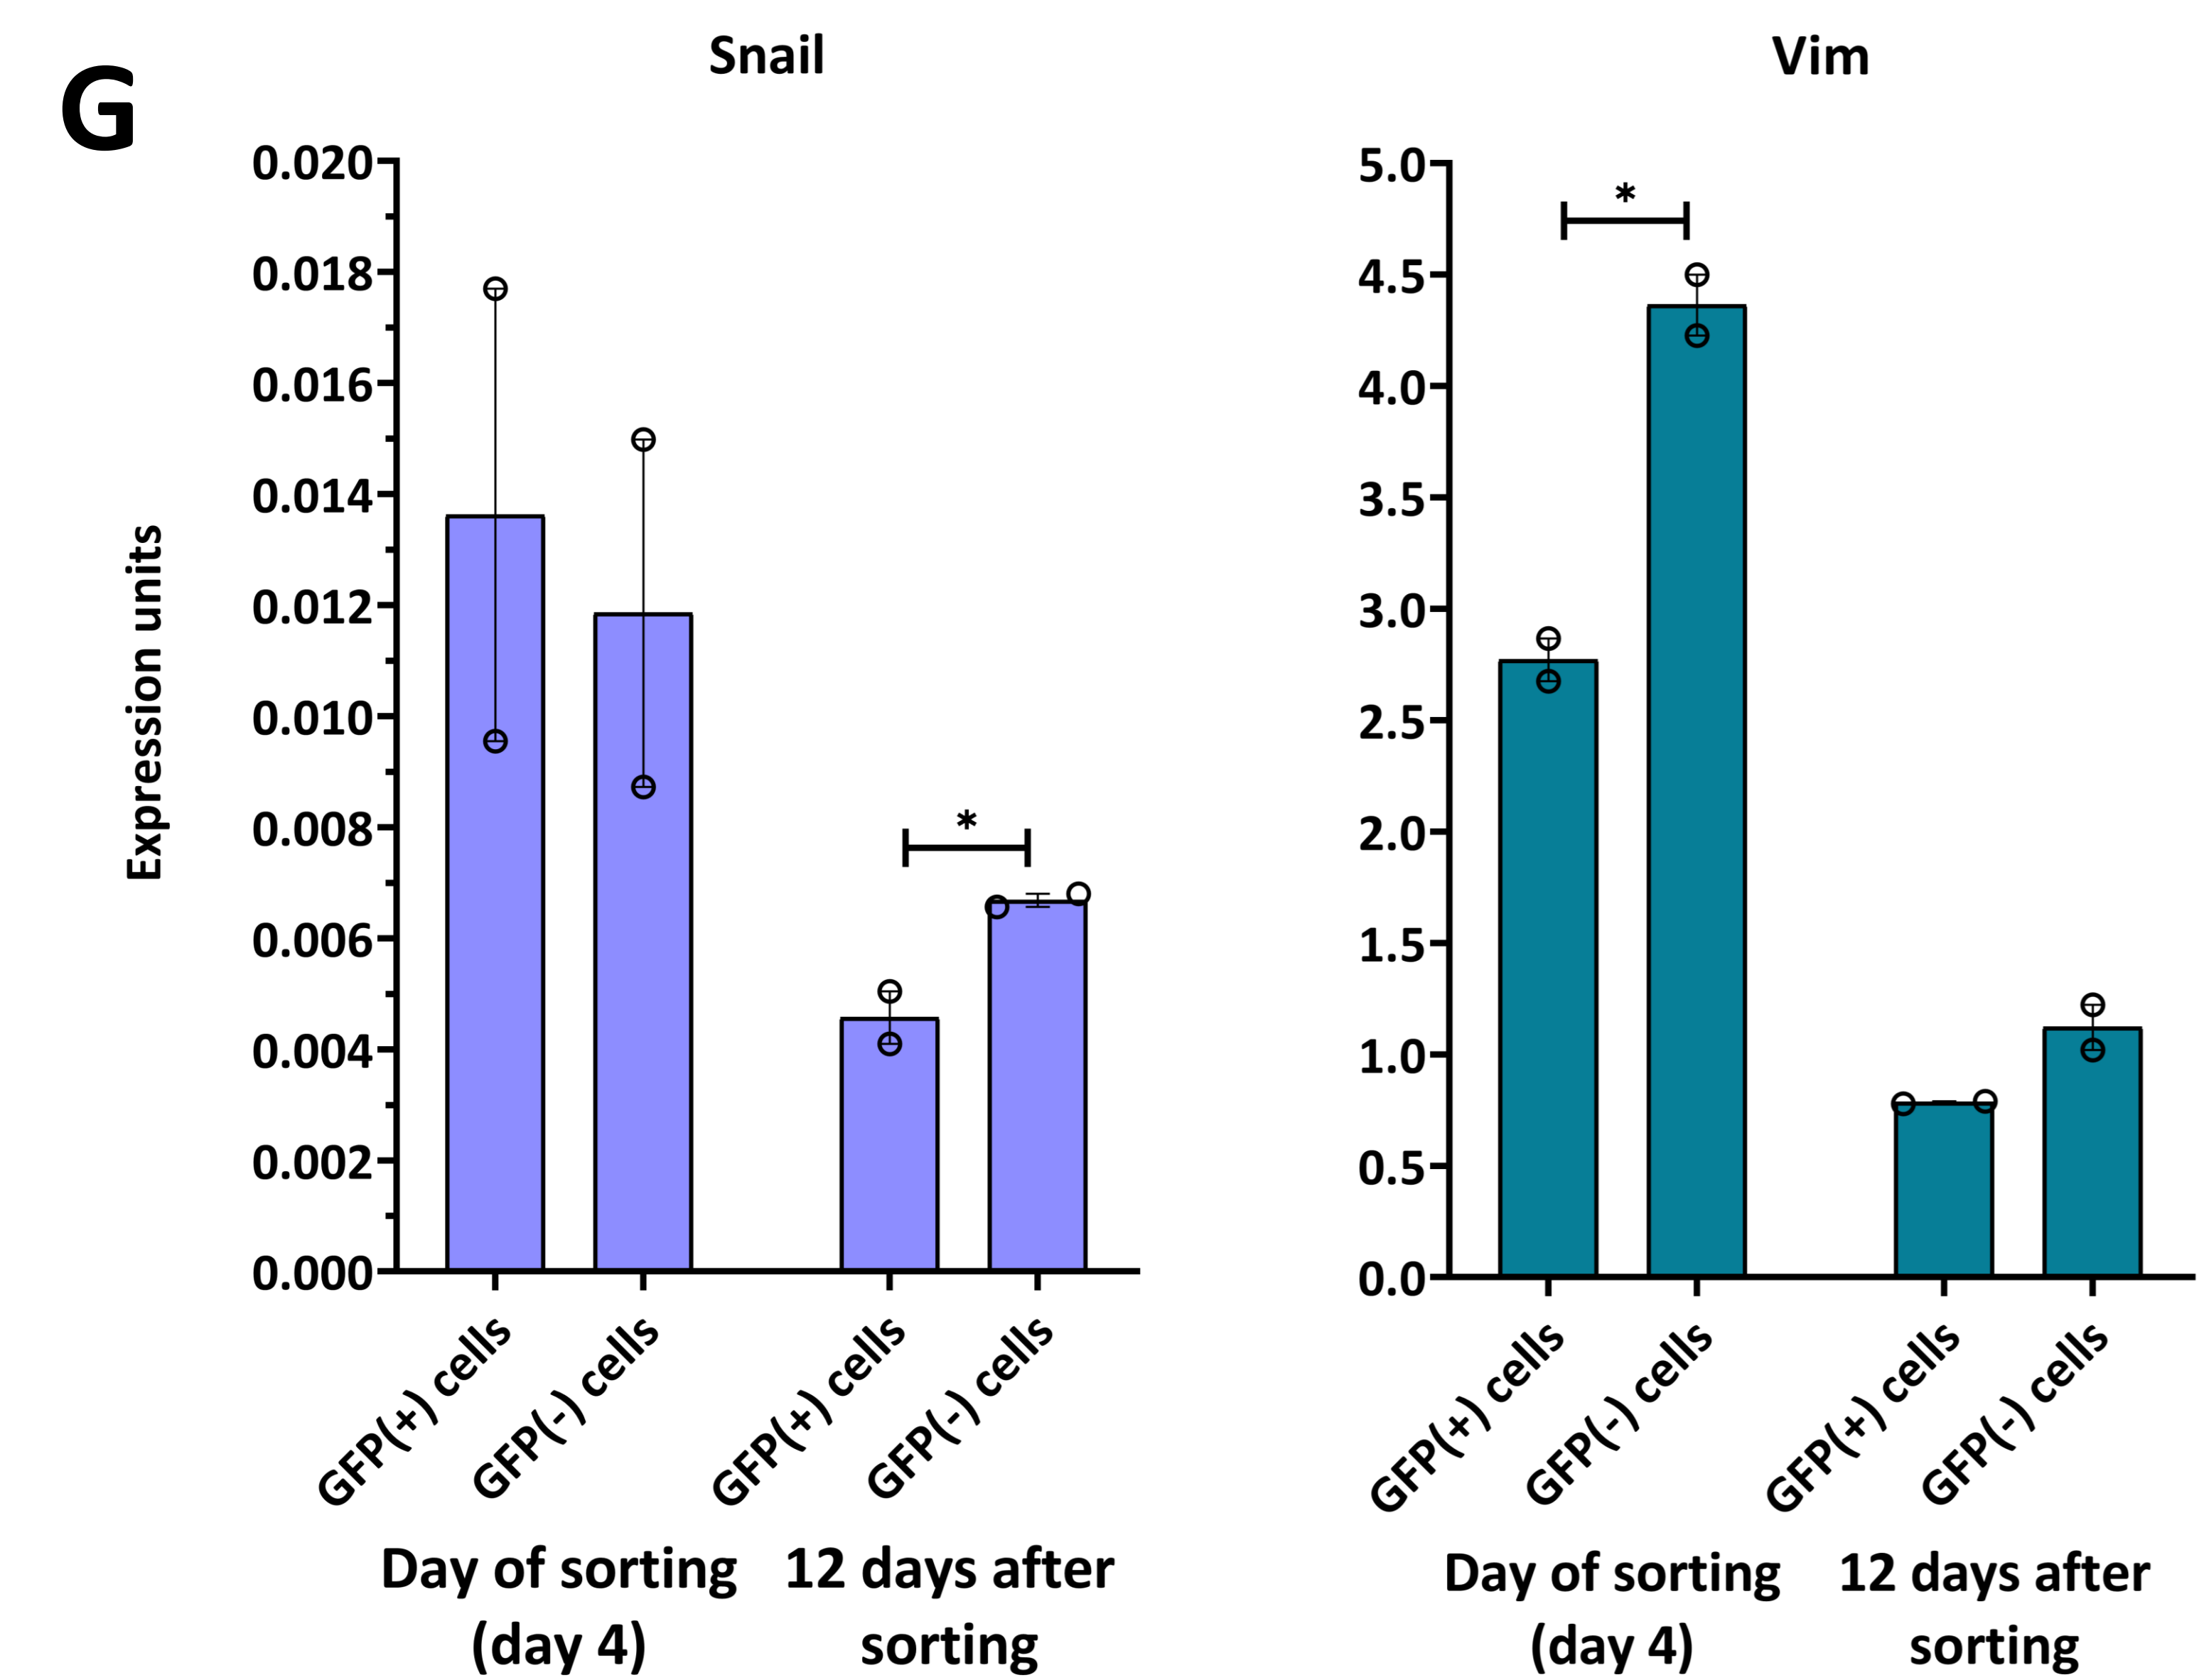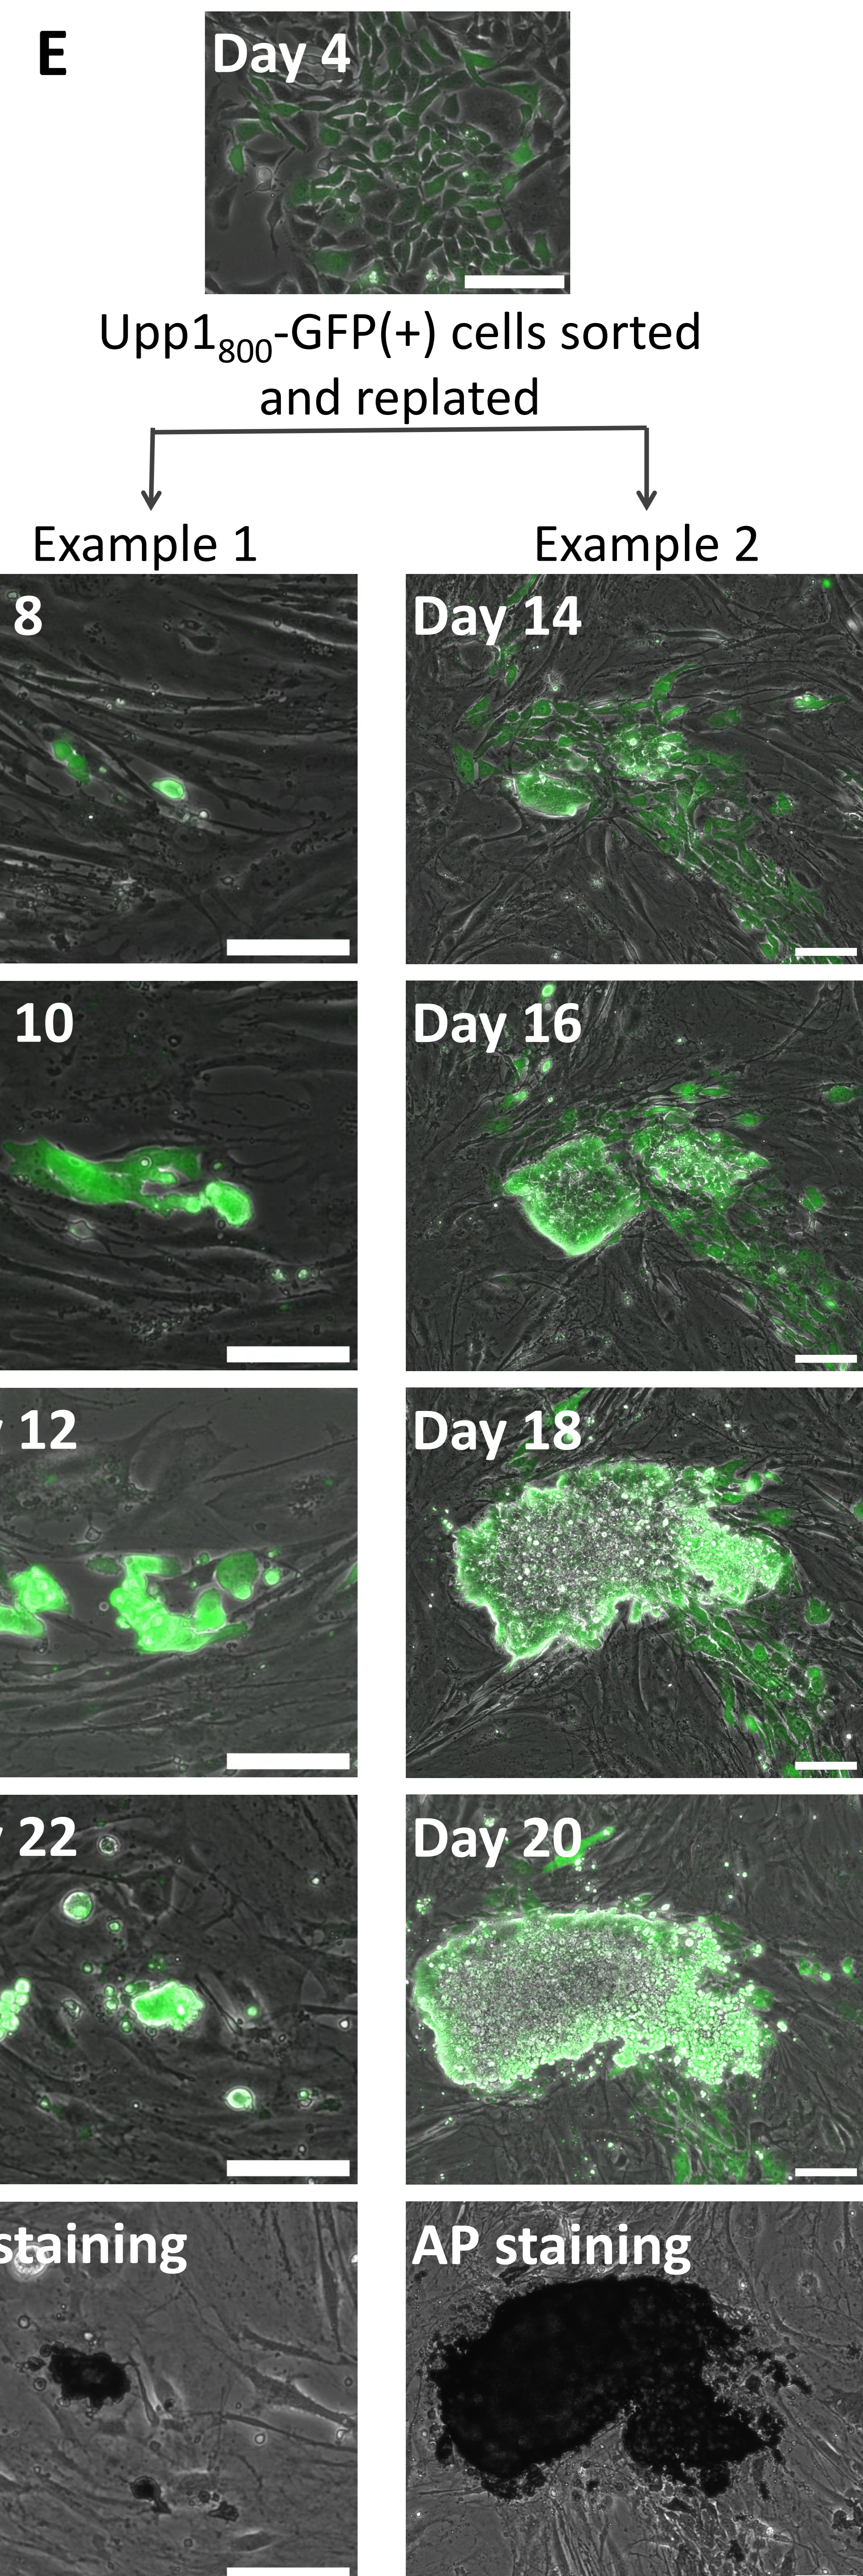

Supplement: Supplementary file 6 [file supplementary]
